# Supplementary material for: Concise synthesis of 2,3-disubstituted quinoline derivatives via ruthenium-catalyzed three-component deaminative coupling reaction of anilines, aldehydes and amines
Source: Royal Society of Chemistry journal article supplement (doi:10.1039/d3ob00348e), 2023-01-01
Supplement: d3ob00348e1.pdf [file d3ob00348e1.pdf]

## Supporting Information

### Concise Synthesis of 2,3-Disubstituted Quinoline Derivatives via Ruthenium-Catalyzed Three-Component Deaminative Coupling Reaction of Anilines, Aldehydes and Amines

Aldiyar Shakenov, Krishna Prasad Gnyawali and Chae S. Yi\*

*Department of Chemistry, Marquette University, Milwaukee, Wisconsin 53233 United States*

\*E-mail: [chae.yi@marquette.edu](mailto:chae.yi@marquette.edu)

#### Table of Contents

|                                                                               |     |
|-------------------------------------------------------------------------------|-----|
| 1. General Information                                                        | S2  |
| 2. Experimental Procedure (Tables S1-S4)                                      | S2  |
| 3. Reaction Profile Experiment (Figure S1)                                    | S5  |
| 4. Carbon Kinetic Isotope Effect Study (Table S5)                             | S6  |
| 5. Hammett Study (Figure S2)                                                  | S7  |
| 6. Detection of Catalytically Relevant Species (Figure S3)                    | S7  |
| 7. X-Ray Crystallographic Data (Figures S4 and S5; Tables S6 and S7)          | S9  |
| 8. Characterization Data of the Products                                      | S12 |
| 9. $^1\text{H}$ and $^{13}\text{C}\{^1\text{H}\}$ NMR Spectra of the Products | S25 |
| 10. References                                                                | S73 |

**1. General Information.** All operations were carried out in a nitrogen-filled glove box or by using standard high vacuum and Schlenk techniques unless otherwise noted. Solvents were freshly distilled over appropriate drying reagents. Benzene, toluene, and hexanes were distilled from purple solutions of sodium and benzophenone, and dichloromethane was dried over calcium hydride prior to use. All organic substrates were received from commercial sources and were used without further purification. Column chromatography was performed on Silicycle ultrapure silica gel P60 (40-63  $\mu\text{m}$  particle size), and thin layer chromatography was performed on EMD Millipore glass back TLC plates pre-coated with silica gel 60 GF<sub>254</sub>. The <sup>1</sup>H, <sup>2</sup>H, <sup>13</sup>C, <sup>19</sup>F and <sup>31</sup>P NMR spectra were recorded on a Varian 300 or 400 MHz FT-NMR spectrometer, and the data are reported in parts per million (ppm) relative to TMS, with the residual solvent peak as an internal reference. Multiplicities are reported as: s = singlet, d = doublet, t = triplet, q = quartet, m = multiplet, br = broad; coupling constant(s) in Hz. Mass spectra were recorded from Shimadzu GCMS-QP2010 SE spectrometer with an SH-Rxi-5sil MS, fused silica (crossbond 1,4-bis(dimethylsiloxy)phenylene dimethyl polysiloxane) column (30 m, 0.25 mm, 0.25  $\mu\text{m}$ ). High resolution mass spectra (HRMS) were obtained at the Analytical Instrumentation Center, School of Pharmacy, University of Wisconsin-Madison, Madison, WI.

**2. Experimental Procedures: General Procedure for the Coupling Reaction of an Aniline with an Aldehyde and an Amine.** In a glove box, complex **1** (11 mg, 5 mol %), an aniline (0.3 mmol), an aldehyde (0.3 mmol) and an amine (0.3 mmol) were dissolved in 1,2-dichloroethane (1.5 mL) in a 25 mL Schlenk tube equipped with a Teflon stopcock and a magnetic stirring bar. The tube was brought out of the glove box and was stirred in an oil bath set at 120 °C for 20 h. The reaction tube was taken out of the oil bath and was cooled to room temperature. After the tube was open to air, the solution was filtered through a short silica gel column by eluting with CH<sub>2</sub>Cl<sub>2</sub> (10 mL), and the filtrate was analyzed by GC-MS. The analytically pure product was isolated by column chromatography on silica gel (40-63  $\mu\text{m}$  particle size, hexanes/EtOAc = 100:1 to 95:5). The product was characterized by NMR and GC-MS spectroscopic methods.

**Catalyst Screening and Optimization Study.** In a glove box, catalyst (5 mol %), 3,5-dimethoxyaniline (1.5 mmol) and triallylamine (1.5 mmol) were dissolved in 1,2-dichloroethane (1.5 mL) in a 25 mL Schlenk tube equipped with a Teflon stopcock and a magnetic stirring bar. The tube was brought out of the glove box and was stirred in an oil bath at 120 °C for 24 h. The product yield was determined by GC-MS by using hexamethylbenzene as an internal standard. The results are summarized in Table S1.

**Table S1.** Catalyst Screening and Optimization for the Reaction of 3,5-Dimethoxyaniline, 4-Methoxybenzaldehyde and Triallylamine.

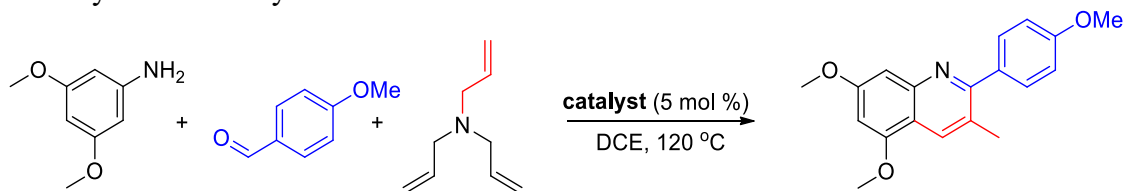

| entry | catalyst                                                                                                               | additive (mol %)                        | yield (%) <sup>a,b</sup> |
|-------|------------------------------------------------------------------------------------------------------------------------|-----------------------------------------|--------------------------|
| 1     | <b>1</b>                                                                                                               | -                                       | 78                       |
| 2     | <b>1</b>                                                                                                               | <b>L1</b> (10) <sup>c</sup>             | 20                       |
| 3     | <b>1</b>                                                                                                               | HBF <sub>4</sub> ·OEt <sub>2</sub> (10) | <5                       |
| 4     | <b>1</b>                                                                                                               | AgOAc (30)                              | <5                       |
| 5     | [(PCy <sub>3</sub> )(CO)RuH] <sub>4</sub> (μ-O)(μ-OH) <sub>2</sub>                                                     | -                                       | 30                       |
| 6     | [(PCy <sub>3</sub> )(CO)RuH] <sub>4</sub> (μ-O)(μ-OH) <sub>2</sub>                                                     | <b>L1</b> (10) <sup>c</sup>             | 29                       |
| 7     | [(C <sub>6</sub> H <sub>6</sub> )(CO)(PCy <sub>3</sub> )RuH] <sup>+</sup> BF <sub>4</sub> <sup>-</sup>                 | -                                       | 30                       |
| 8     | [( <i>p</i> -cymene)RuCl <sub>2</sub> ] <sub>2</sub>                                                                   | -                                       | 40                       |
| 9     | RuCl <sub>3</sub> ·nH <sub>2</sub> O                                                                                   | -                                       | 51                       |
| 10    | (PPh <sub>3</sub> ) <sub>3</sub> RuCl <sub>2</sub>                                                                     | -                                       | 44                       |
| 11    | Ru <sub>3</sub> (CO) <sub>12</sub>                                                                                     | -                                       | 27                       |
| 12    | (PPh <sub>3</sub> ) <sub>3</sub> (CO)RuH <sub>2</sub>                                                                  | -                                       | 0                        |
| 13    | [(PCy <sub>3</sub> ) <sub>2</sub> (CO)(CH <sub>3</sub> CN) <sub>2</sub> RuH] <sup>+</sup> BF <sub>4</sub> <sup>-</sup> | -                                       | 33                       |
| 14    | [(COD)RuCl <sub>2</sub> ] <sub>x</sub>                                                                                 | -                                       | 0                        |
| 15    | AlCl <sub>3</sub>                                                                                                      | -                                       | 0                        |
| 16    | PCy <sub>3</sub>                                                                                                       | -                                       | <5                       |

<sup>a</sup>Reaction conditions: catalyst (5 mol %), 3,5-dimethoxyaniline (0.3 mmol), 4-methoxybenzaldehyde (0.3 mmol), triallylamine (0.3 mmol), 1,2-dichloroethane (1.5 mL), 20 h, 120 °C. <sup>b</sup>GC yields using hexamethylbenzene as an internal standard. <sup>c</sup>**L1** = 3,4,5,6-tetrachloro-1,2-benzoquinone.

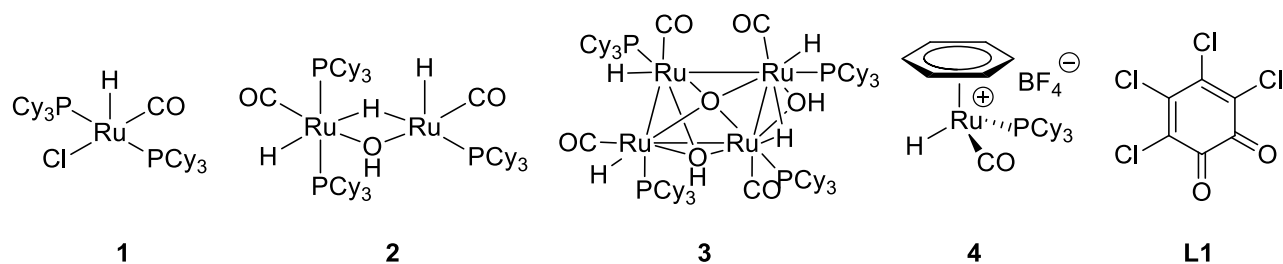

**Table S2.** Solvent Screening Study for the Reaction of 3,5-Dimethoxyaniline, 4-Methoxybenzaldehyde and Triallylamine.

| entry | solvent                               | yield (%) <sup>a,b</sup> |
|-------|---------------------------------------|--------------------------|
| 1     | 1,2-dichloroethane                    | 78                       |
| 2     | 1,2-dichloroethane: toluene (1:1)     | 41                       |
| 3     | 1,2-dichloroethane: 1,4-dioxane (1:1) | 63                       |
| 4     | 1,4-dioxane                           | 45                       |
| 5     | dichloromethane                       | 61                       |
| 6     | toluene                               | 56                       |
| 7     | tetrahydrofuran                       | 60                       |
| 8     | benzene                               | 44                       |
| 9     | chlorobenzene                         | 48                       |

<sup>a</sup> Reaction conditions: **1** (5 mol %), 3,5-dimethoxyaniline (0.30 mmol), 4-methoxybenzaldehyde (0.30 mmol), triallylamine (0.3 mmol), solvent (1.5 mL), 20 h, 120 °C. <sup>b</sup> GC yields using hexamethylbenzene as an internal standard

**Table S3.** Catalyst Loading Study for the Reaction of 3,5-Dimethoxyaniline, 4-Methoxybenzaldehyde and Triallylamine

| entry | catalyst loading (mol %) | yield (%) <sup>a,b</sup> |
|-------|--------------------------|--------------------------|
| 1     | 1                        | 27                       |
| 2     | 3                        | 70                       |
| 3     | 5                        | 76                       |
| 4     | 10                       | 61                       |
| 6     | 20                       | 60                       |

<sup>a</sup> Reaction conditions: 3,5-dimethoxyaniline (0.30 mmol), 4-methoxybenzaldehyde (0.30 mmol), 1,2-dichloroethane (1.5 mL), 20 h, 120 °C. <sup>b</sup> GC yields using hexamethylbenzene as an internal standard

**Table S4.** Optimal Temperature Survey for the Reaction of 3,5-Dimethoxyaniline, 4-Methoxybenzaldehyde and Triallylamine

| entry | Temperature (°C) | yield (%) <sup>a,b</sup> |
|-------|------------------|--------------------------|
| 1     | 140              | 67                       |
| 2     | 120              | 75                       |
| 3     | 100              | 47                       |
| 4     | 80               | 5                        |
| 5     | 60               | 6                        |

<sup>a</sup> Reaction conditions: **1** (5 mol %), 3,5-dimethoxyaniline (0.30 mmol), 4-methoxybenzaldehyde (0.30 mmol), triallylamine (0.3 mmol), solvent (1.5 mL), 20 h, 120 °C. <sup>b</sup> GC yields using hexamethylbenzene as an internal standard

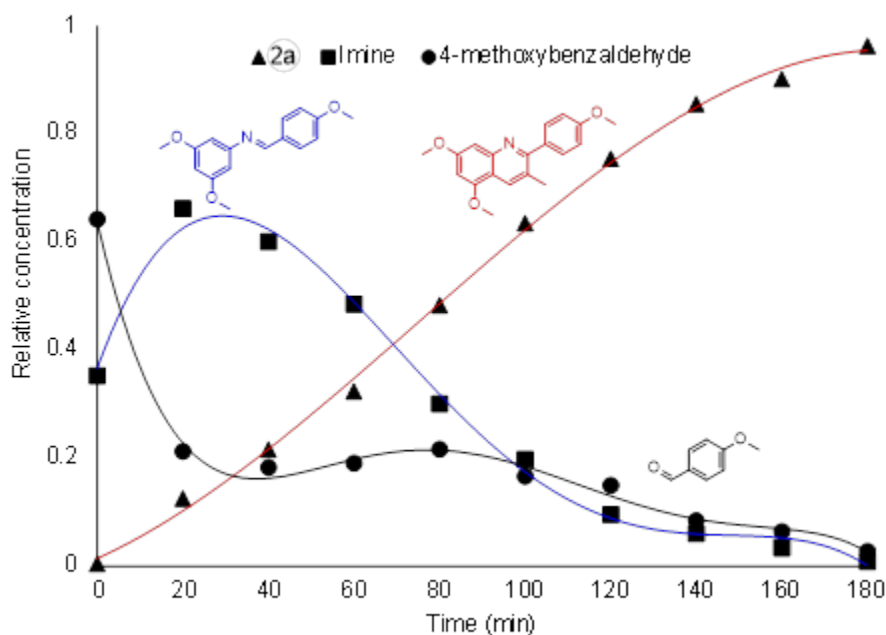

**Figure S1.** The Reaction Profile from the Reaction of 3,5-Dimethoxyaniline and *p*-OMe-C<sub>6</sub>H<sub>4</sub>CHO with Triallylamine. *p*-OMe-C<sub>6</sub>H<sub>4</sub>CHO (●), **2a** (▲), 3,5-Dimethoxy-*N*-(4-methoxybenzylidene)aniline (**4a**) (■).

**3. Reaction Profile Experiment.** In a glove box, complex **1** (72 mg, 0.1 mmol), 3,5-dimethoxyaniline (15 mg, 0.1 mmol), 4-methoxybenzaldehyde (14 mg, 0.1 mmol) and triallylamine (14 mg, 0.1 mmol) were dissolved in CD<sub>2</sub>Cl<sub>2</sub> (0.5 mL) in a J-Young NMR tube equipped with a Teflon screw cap stopcock. The tube was brought out of the glove box and was emersed in an oil bath set at 120 °C. The tube was taken out of the oil bath at 20 min intervals, was immediately cooled in an ice-water bath and was analyzed by <sup>1</sup>H NMR. The product

concentration was measured by monitoring the appearance of the product signals on  $^1\text{H}$  NMR, which was normalized against the internal standard peak (hexamethylbenzene).

**4. Carbon Kinetic Isotope Effect Study.** In a glove box, complex **1** (36 mg, 5 mol %), 3,5-dimethoxyaniline (153 mg, 1.0 mmol), 4-(trifluoromethyl)benzaldehyde (174 mg, 1.0 mmol) and triallylamine (137 mg, 1.0 mmol) were dissolved in 1,2-dichloroethane (1.5 mL) in a 25 mL Schlenk tube equipped with a Teflon screw cap stopcock and a magnetic stirring bar. The resulting mixture was stirred in an oil bath at 120 °C for 20 h. The procedure was repeated two more times, and the product conversion was determined by GC (91%, 88% and 87% conversion). For low conversion samples, complex **1** (36 mg, 5 mol %), 3,5-dimethoxyaniline (153 mg, 1.0 mmol), 4-(trifluoromethyl)benzaldehyde (174 mg, 1.0 mmol) and triallylamine (137 mg, 1.0 mmol) were dissolved in 1,2-dichloroethane (1.5 mL) in a 25 mL Schlenk tube equipped with a Teflon screw cap stopcock and a magnetic stirring bar, and the resulting mixture was stirred for in an oil bath at 120 °C for 4 h. The procedure was repeated two more times, and the product conversion was determined by GC (14%, 18% and 15% conversion). The  $^{13}\text{C}\{^1\text{H}\}$  NMR analysis of the isolated product **2e** was performed by following Singleton's NMR method.<sup>S1</sup> The NMR sample was prepared identically by dissolving **2e** (200 mg) in  $\text{CDCl}_3$  (0.5 mL) in a 5 mm high precision NMR tube. The  $^{13}\text{C}\{^1\text{H}\}$  NMR spectra were recorded with H-decoupling and 45-degree pulses. A 60 s delay between pulses was imposed to minimize  $T_1$  variations ( $d_1 = 120$  s,  $at = 5.0$  s,  $np = 245098$ ,  $nt = 512$ ,  $dm = \text{'nny'}$ ). The data obtained were summarized in Table S2.

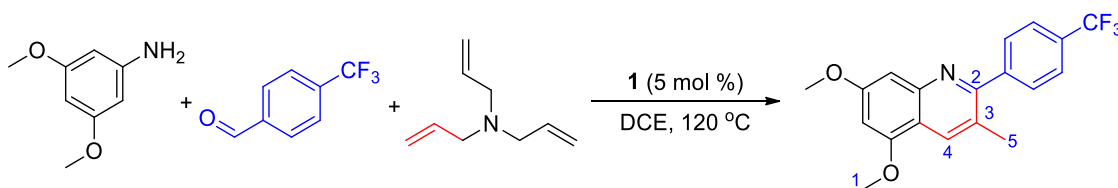

| carbon no. | high conv. $R_0$ | low conv. $R_1$ | $R_0/R_1$ | calculated KIE |
|------------|------------------|-----------------|-----------|----------------|
| 1 (ref)    | 1.000            | 1.000           | 1.000     | 1.000          |
| 2          | 1.080            | 1.088           | 0.992     | 0.993          |
| 3          | 1.267            | 1.256           | 1.009     | 1.009          |
| 4          | 1.057            | 1.061           | 0.996     | 0.996          |
| 5          | 1.189            | 1.142           | 1.041     | <b>1.041</b>   |

**Table S5.**  $^{13}\text{C}$  Integration of the Product **2e** at High Conversion ( $R_0$ , 88% Conversion), at Low Conversion ( $R_1$ , 16% Conversion), and the Calculated  $R_0/R_1$ .

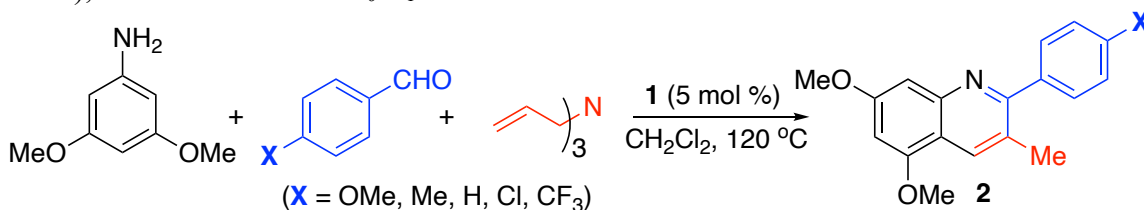

**5. Hammett Study.** In a glove box, complex **1** (5 mol %), 3,5-dimethoxyaniline (0.5 mmol) and triallylamine (0.5 mmol) were dissolved in CD<sub>2</sub>Cl<sub>2</sub> (0.5 mL) in a 25 mL reaction tube. The solution was divided into five equal portions, transferred into five separate J-Young NMR tubes, and *p*-X-C<sub>6</sub>H<sub>5</sub>CHO (X = OMe, Me, H, Cl, CF<sub>3</sub>) (0.1 mmol) was added to each reaction tube. The tubes were brought out of the glove box and were immersed in an oil bath at 120 °C. The tubes were taken out of the bath at 20 min intervals, immediately cooled in ice-water bath and were analyzed by <sup>1</sup>H NMR. The rate of reaction was measured by monitoring product peaks and normalized using hexamethylbenzene as an internal standard. The *k*<sub>obs</sub> of each reaction was determined from first-order plot of  $-\ln[(3,5\text{-dimethoxyaniline})_t/(3,5\text{-dimethoxyaniline})_0]$  vs time. The Hammett plot of  $\log(k_X/k_H)$  vs  $\sigma_p$  is shown in Figure S2.

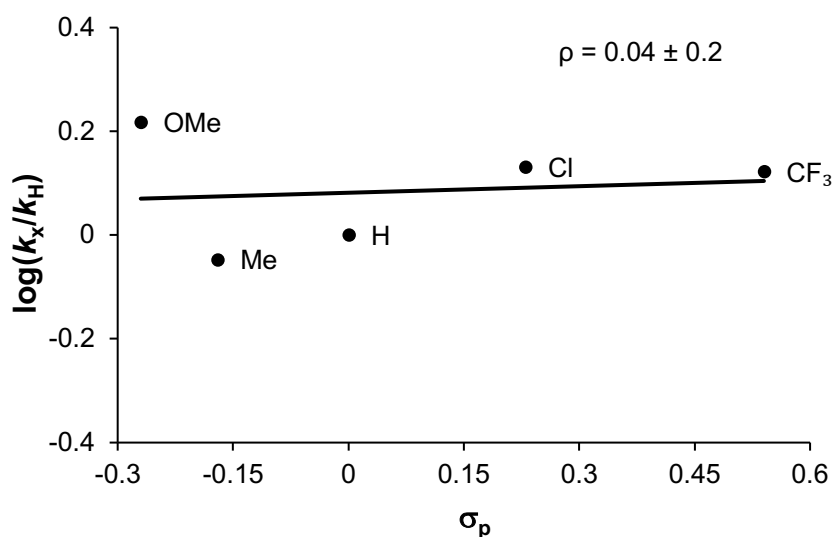

**Figure S2.** Hammett Plot from the Reaction of 3,5-Dimethoxyaniline with *p*-X-C<sub>6</sub>H<sub>4</sub>CHO (X = OMe, Me, H, Cl, CF<sub>3</sub>) and Triallylamine.

**6. Generation and Detection of Catalytically Relevant Species.** The imine substrate ((3-(dimethylamino)-1-phenylpropylidene)-3,5-dimethoxyaniline) (**6a**) was synthesized from the reaction of 3-(dimethylamino)-1-phenylpropan-1-one (178 mg, 1.0 mmol) with 3,5-dimethoxyaniline (154 mg, 1.0 mmol) in CH<sub>2</sub>Cl<sub>2</sub> (2 mL), which was stirred at room temperature for 24 h. In a glove box, complex **1** (11 mg, 5 mol %) and product **6a** (0.3 mmol) were dissolved in 1,2-dichloroethane (1.5 mL) in a 25 mL Schlenk tube equipped with a Teflon stopcock and a magnetic stirring bar. The tube was brought out of the glove box and was immersed in an oil bath set at 120 °C. The tube was taken out of the oil bath after 20 h. The product yield was determined by GC-MS by using hexamethylbenzene as an internal standard. The resulting quinoline **2k** was isolated using column chromatography on silica gel (hexanes/EtOAc = 100:1 to 95:5).

**Spectroscopic Detection of Catalytically Relevant Species.** In glovebox, the complex **1** (73 mg, 0.10 mmol) was dissolved in CD<sub>2</sub>Cl<sub>2</sub> (0.2 mL) in an J-Young NMR tube equipped with resealable stopcock. The imine substrate 2-(((3,5-dimethoxyphenyl)imino)methyl)phenol (**4b**) (52 mg, 0.2 mmol) was added to the mixture. The reaction was monitored by <sup>1</sup>H NMR after heating for 120 s at 120 °C. After recording the <sup>31</sup>P {<sup>1</sup>H} NMR, a small sample was taken from the reaction tube and was analyzed with LC-MS. The LC-MS spectra are shown in Figure S3.

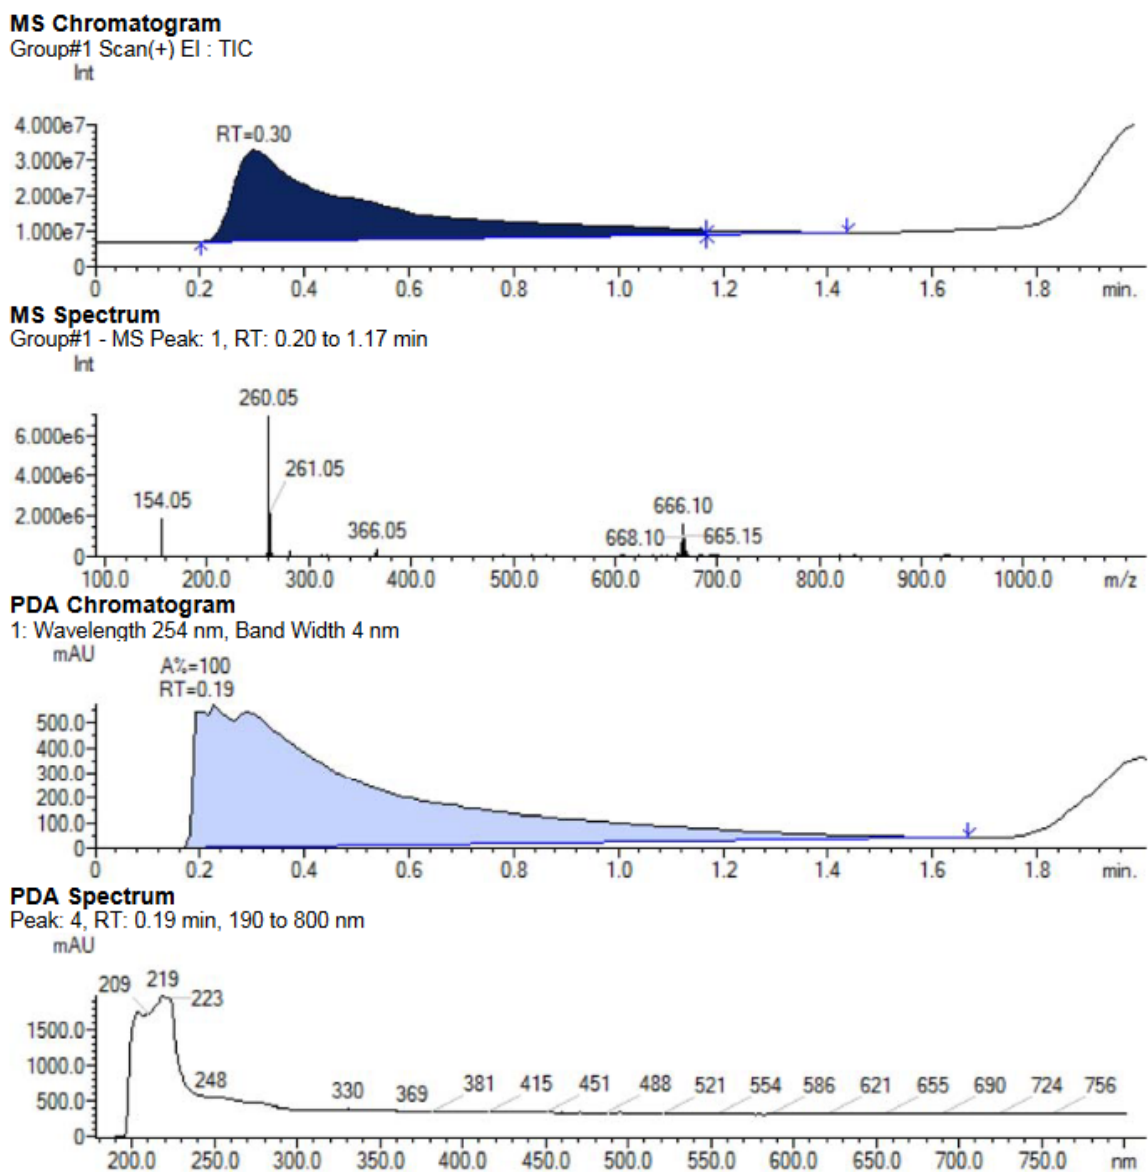

**Figure S3.** LC-MS spectra from the Reaction Mixture of **1** and 2-(((3,5-Dimethoxyphenyl)imino)methyl)phenol (**4a**).



**7. X-Ray Crystallographic Analysis of 2n and 2r.** For **2n**: Single crystals of **2n** were grown in CH<sub>2</sub>Cl<sub>2</sub>/hexanes at room temperature. A suitable crystal was selected and mounted on an Oxford SuperNova diffractometer equipped with dual microfocus Cu/Mo X-ray sources, X-ray mirror optics, and Atlas CCD area detector. The crystal was kept at 99.95(10) K during data collection. Using Olex2<sup>S2</sup>, the structure was solved with the olex2.solve<sup>S3</sup> structure solution program using Charge Flipping and refined with the SHELXL<sup>S4</sup> refinement package using Least Squares minimization.

For **2r**: Single crystals of **2r** were grown in CH<sub>2</sub>Cl<sub>2</sub>/hexanes at room temperature. A suitable crystal was selected and mounted on an Oxford SuperNova diffractometer equipped with dual microfocus Cu/Mo X-ray sources, X-ray mirror optics, and Atlas CCD area detector. The crystal was kept at 99.95(10) K during data collection. Using Olex2<sup>S2</sup>, the structure was solved with the olex2.solve<sup>S3</sup> structure solution program using Charge Flipping and refined with the SHELXL<sup>S4</sup> refinement package using Least Squares minimization.

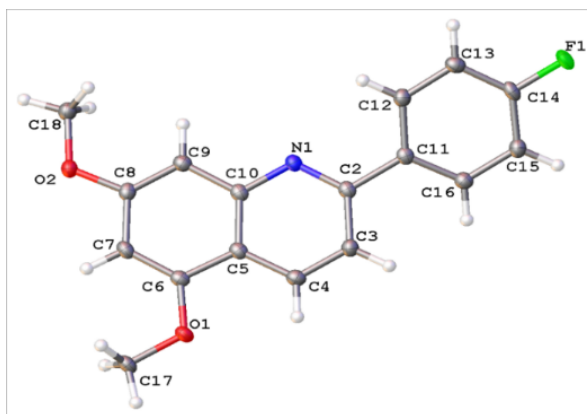

**Figure S4.** Molecular Structure of **2n**.

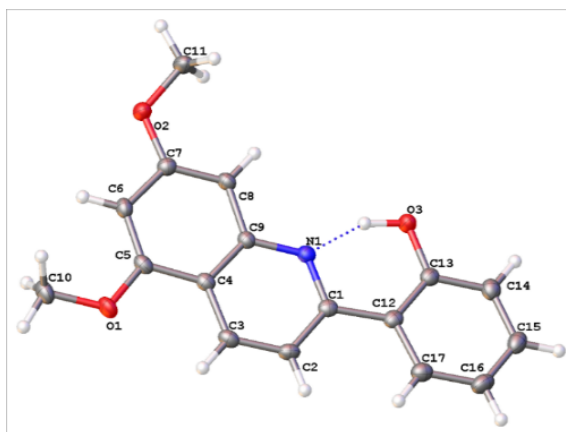

**Figure S5.** Molecular Structure of **2r**.

**Table S6.** Crystal Data and Structure Refinement for **2n**.

---

|                                             |                                                               |
|---------------------------------------------|---------------------------------------------------------------|
| Empirical formula                           | C <sub>17</sub> H <sub>14</sub> FNO <sub>2</sub>              |
| Formula weight                              | 283.29                                                        |
| Temperature/K                               | 99.95(10)                                                     |
| Crystal system                              | monoclinic                                                    |
| Space group                                 | C2/c                                                          |
| a/Å                                         | 26.2945(5)                                                    |
| b/Å                                         | 3.86139(6)                                                    |
| c/Å                                         | 25.3106(4)                                                    |
| α/°                                         | 90                                                            |
| β/°                                         | 94.4637(17)                                                   |
| γ/°                                         | 90                                                            |
| Volume/Å <sup>3</sup>                       | 2562.08(8)                                                    |
| Z                                           | 8                                                             |
| ρ <sub>calc</sub> /g/cm <sup>3</sup>        | 1.469                                                         |
| μ/mm <sup>-1</sup>                          | 0.879                                                         |
| F(000)                                      | 1184.0                                                        |
| Crystal size/mm <sup>3</sup>                | 0.44 × 0.199 × 0.026                                          |
| Radiation                                   | Cu Kα (λ = 1.54184)                                           |
| 2θ range for data collection/°              | 7.006 to 140.822                                              |
| Index ranges                                | -32 ≤ h ≤ 31, -4 ≤ k ≤ 4, -30 ≤ l ≤ 30                        |
| Reflections collected                       | 12360                                                         |
| Independent reflections                     | 2437 [R <sub>int</sub> = 0.0235, R <sub>sigma</sub> = 0.0149] |
| Data/restraints/parameters                  | 2437/0/192                                                    |
| Goodness-of-fit on F <sup>2</sup>           | 1.036                                                         |
| Final R indexes [I ≥ 2σ (I)]                | R <sub>1</sub> = 0.0330, wR <sub>2</sub> = 0.0870             |
| Final R indexes [all data]                  | R <sub>1</sub> = 0.0367, wR <sub>2</sub> = 0.0912             |
| Largest diff. peak/hole / e Å <sup>-3</sup> | 0.20/-0.24                                                    |

---

**Table S7.** Crystal Data and Structure Refinement for **2r**.

---

|                                             |                                                               |
|---------------------------------------------|---------------------------------------------------------------|
| Empirical formula                           | C <sub>17</sub> H <sub>15</sub> NO <sub>3</sub>               |
| Formula weight                              | 281.30                                                        |
| Temperature/K                               | 100.00(10)                                                    |
| Crystal system                              | monoclinic                                                    |
| Space group                                 | P2 <sub>1</sub> /n                                            |
| a/Å                                         | 14.9864(5)                                                    |
| b/Å                                         | 4.87230(14)                                                   |
| c/Å                                         | 18.6483(6)                                                    |
| α/°                                         | 90                                                            |
| β/°                                         | 102.739(3)                                                    |
| γ/°                                         | 90                                                            |
| Volume/Å <sup>3</sup>                       | 1328.16(7)                                                    |
| Z                                           | 4                                                             |
| ρ <sub>calc</sub> /cm <sup>3</sup>          | 1.407                                                         |
| μ/mm <sup>-1</sup>                          | 0.097                                                         |
| F(000)                                      | 592.0                                                         |
| Crystal size/mm <sup>3</sup>                | 0.762 × 0.198 × 0.153                                         |
| Radiation                                   | Mo Kα (λ = 0.71073)                                           |
| 2θ range for data collection/°              | 6.684 to 59.412                                               |
| Index ranges                                | -20 ≤ h ≤ 20, -6 ≤ k ≤ 5, -25 ≤ l ≤ 25                        |
| Reflections collected                       | 15671                                                         |
| Independent reflections                     | 3460 [R <sub>int</sub> = 0.0278, R <sub>sigma</sub> = 0.0275] |
| Data/restraints/parameters                  | 3460/0/196                                                    |
| Goodness-of-fit on F <sup>2</sup>           | 1.033                                                         |
| Final R indexes [I ≥ 2σ (I)]                | R <sub>1</sub> = 0.0464, wR <sub>2</sub> = 0.1138             |
| Final R indexes [all data]                  | R <sub>1</sub> = 0.0615, wR <sub>2</sub> = 0.1256             |
| Largest diff. peak/hole / e Å <sup>-3</sup> | 0.34/-0.28                                                    |

---

## 8. Characterization Data of the Products.

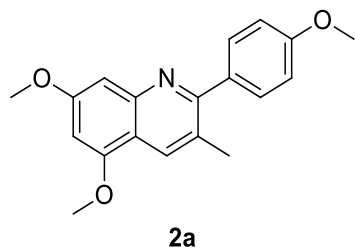

**5,7-Dimethoxy-2-(4-methoxyphenyl)-3-methylquinoline (2a).** A 1,2-dichloroethane (1.5 mL) solution of complex **1** (11 mg, 5 mol %), 3,5-dimethoxyaniline (46 mg, 0.3 mmol), 4-methoxybenzaldehyde (41 mg, 0.3 mmol) and triallylamine (41 mg, 0.3 mmol) was stirred at 125 °C for 20 h. The product **2a** was isolated using column chromatography on silica gel (hexanes/EtOAc = 100:1 to 95:5). Yield: 70 mg (75%). Data for **2a**:  $^1\text{H}$  NMR (400 MHz,  $\text{CDCl}_3$ )  $\delta$  8.27 (s, 1H), 7.54 (d,  $J = 8.8$  Hz, 2H), 7.07-6.96 (m, 3H), 6.48 (d,  $J = 1.9$  Hz, 1H), 3.96 (s, 3H), 3.91 (s, 3H), 3.86 (s, 3H), 2.44 (s, 3H) ppm;  $^{13}\text{C}\{^1\text{H}\}$  NMR (101 MHz,  $\text{CDCl}_3$ )  $\delta$  160.7, 160.5, 159.6, 155.5, 148.7, 133.6, 131.8, 130.4, 126.0, 115.8, 113.7, 99.6, 97.9, 55.8, 55.7, 55.5, 20.7 ppm; GC-MS for  $\text{C}_{19}\text{H}_{19}\text{NO}_3$ ,  $m/z = 309$  ( $\text{M}^+$ ); HRMS (ESI-TOF) Calcd for  $\text{C}_{19}\text{H}_{20}\text{NO}_3$  ( $[\text{M} + \text{H}]^+$ ) 310.1438, Found 310.1437.

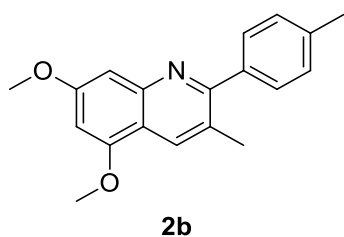

**5,7-Dimethoxy-3-methyl-2-(p-tolyl)quinoline (2b).** A 1,2-dichloroethane (1.5 mL) solution of complex **1** (11 mg, 5 mol %), 3,5-dimethoxyaniline (46 mg, 0.3 mmol), 4-methylbenzaldehyde (36 mg, 0.3 mmol) and triallylamine (41 mg, 0.3 mmol) was stirred at 125 °C for 20 h. The product **2b** was isolated using column chromatography on silica gel (hexanes/EtOAc = 100:1 to 95:5). Yield: 64 mg (73%). Data for **2b**:  $^1\text{H}$  NMR (400 MHz,  $\text{CDCl}_3$ )  $\delta$  8.27 (s, 1H), 7.48 (d,  $J = 7.7$  Hz, 2H), 7.28 (d,  $J = 7.7$  Hz, 2H), 7.06 (d,  $J = 2.2$  Hz, 1H), 6.54-6.44 (m, 1H), 3.94 (d,  $J = 19.9$  Hz, 6H), 2.42 (s, 6H) ppm;  $^{13}\text{C}\{^1\text{H}\}$  NMR (101 MHz,  $\text{CDCl}_3$ )  $\delta$  160.9, 160.6, 155.5, 148.6, 138.2, 137.8, 131.7, 129.0, 128.8, 126, 115.9, 99.7, 97.9, 55.8, 55.6, 21.4, 20.6 ppm; GC-MS for  $\text{C}_{19}\text{H}_{19}\text{NO}_2$ ,  $m/z = 293$  ( $\text{M}^+$ ); HRMS (ESI-TOF) Calcd for  $\text{C}_{19}\text{H}_{20}\text{NO}_2$  ( $[\text{M} + \text{H}]^+$ ) 294.1489, Found 294.1488.

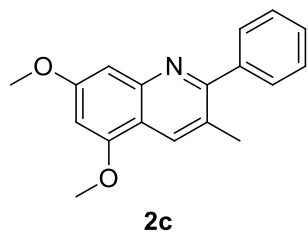

**5,7-Dimethoxy-3-methyl-2-phenylquinoline (2c).** A 1,2-dichloroethane (1.5 mL) solution of complex **1** (11 mg, 5 mol %), 3,5-dimethoxyaniline (46 mg, 0.3 mmol), benzaldehyde (32 mg, 0.3 mmol) and triallylamine (41 mg, 0.3 mmol) was stirred at 125 °C for 20 h. The product **2c** was isolated using column chromatography on silica gel (hexanes/EtOAc = 100:1 to 95:5). Yield: 65 mg (78%). Data for **2c**:  $^1\text{H}$  NMR (400 MHz,  $\text{CDCl}_3$ )  $\delta$  8.29 (s, 1H), 7.57 (d,  $J = 7.9$  Hz, 2H), 7.44 (dt,  $J = 23.4, 7.2$  Hz, 3H), 7.11-6.99 (m, 1H), 6.50 (d,  $J = 1.6$  Hz, 1H), 3.95 (d,  $J = 26.6$  Hz, 6H), 2.42 (s, 3H) ppm;  $^{13}\text{C}\{^1\text{H}\}$  NMR (101 MHz,  $\text{CDCl}_3$ )  $\delta$  161.0, 160.7, 155.5, 148.7, 141.2, 131.8, 128.9, 128.4, 128.1, 126.1, 116, 99.8, 98.1, 55.9, 55.7, 20.5 ppm; GC-MS for  $\text{C}_{18}\text{H}_{17}\text{NO}_2$ ,  $m/z = 279$  ( $\text{M}^+$ ); HRMS (ESI-TOF) Calcd for  $\text{C}_{18}\text{H}_{18}\text{NO}_2$  ( $[\text{M} + \text{H}]^+$ ) 280.1326, Found 280.1332.

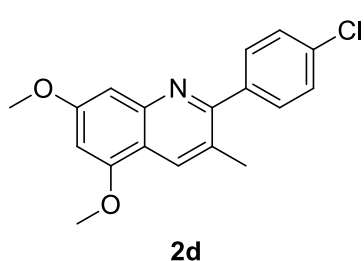

**2-(4-Chlorophenyl)-5,7-dimethoxy-3-methylquinoline (2d).** A 1,2-dichloroethane (1.5 mL) solution of complex **1** (11 mg, 5 mol %), 3,5-dimethoxyaniline (46 mg, 0.3 mmol), 4-chlorobenzaldehyde (42 mg, 0.3 mmol) and triallylamine (41 mg, 0.3 mmol) was stirred at 125 °C for 20 h. The product **2d** was isolated using column chromatography on silica gel (hexanes/EtOAc = 100:1 to 95:5). Yield: 64 mg (68%). Data for **2d**:  $^1\text{H NMR}$  (400 MHz,  $\text{CDCl}_3$ )  $\delta$  8.29 (s, 1H), 7.52 (d,  $J = 8.3$  Hz, 2H), 7.44 (d,  $J = 8.4$  Hz, 2H), 7.03 (s, 1H), 6.50 (d,  $J = 1.8$  Hz, 1H), 3.94 (d,  $J = 24.8$  Hz, 6H), 2.40 (s, 3H) ppm;  $^{13}\text{C}\{^1\text{H}\}$  NMR (101 MHz,  $\text{CDCl}_3$ )  $\delta$  160.9, 159.6, 155.5, 148.7, 139.5, 134.3, 132.1, 130.4, 128.6, 125.7, 116.2, 99.6, 98.3, 55.9, 55.7, 20.4 ppm; GC-MS for  $\text{C}_{18}\text{H}_{16}\text{ClNO}_2$ ,  $m/z = 313$  ( $\text{M}^+$ ); HRMS (ESI-TOF) Calcd for  $\text{C}_{18}\text{H}_{17}\text{ClNO}_2$  ( $[\text{M} + \text{H}]^+$ ) 314.0942, Found 314.0943.

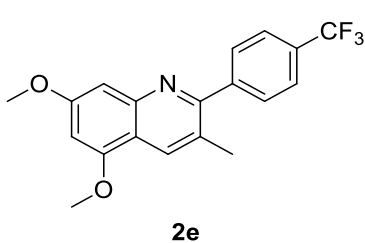

**5,7-Dimethoxy-3-methyl-2-(4-(trifluoromethyl)phenyl)quinoline (2e).** A 1,2-dichloroethane (1.5 mL) solution of complex **1** (11 mg, 5 mol %), 3,5-dimethoxyaniline (46 mg, 0.3 mmol), 4-(trifluoromethyl)benzaldehyde (52 mg, 0.3 mmol) and triallylamine (41 mg, 0.3 mmol) was stirred at 125 °C for 20 h. The product was isolated using column chromatography on silica gel (hexanes/EtOAc = 100:1 to 95:5). Yield: 70 mg (67%). Data for **2e**:  $^1\text{H NMR}$  (400 MHz,  $\text{CDCl}_3$ )  $\delta$  8.31 (s, 1H), 7.80-7.60 (m, 4H), 7.02 (s, 1H), 6.50 (s, 1H), 3.93 (d,  $J = 24.8$  Hz, 6H), 2.39 (s, 3H) ppm;  $^{13}\text{C}\{^1\text{H}\}$  NMR (101 MHz,  $\text{CDCl}_3$ )  $\delta$  161.0, 159.3, 155.5, 148.7, 144.7, 132.2, 129.4, 125.7, 125.6, 125.3 (dd,  $J_{\text{CF}} = 7.5, 3.8$  Hz), 123.0, 116.3, 99.5, 98.4, 55.9, 55.7, 20.2 ppm;  $^{19}\text{F NMR}$  (376 MHz,  $\text{CDCl}_3$ )  $\delta$  -62.68 ppm; GC-MS for  $\text{C}_{19}\text{H}_{16}\text{F}_3\text{NO}_2$ ,  $m/z = 347$  ( $\text{M}^+$ ); HRMS (ESI-TOF) Calcd for  $\text{C}_{19}\text{H}_{17}\text{F}_3\text{NO}_2$  ( $[\text{M} + \text{H}]^+$ ) 348.1206, Found 348.1204.

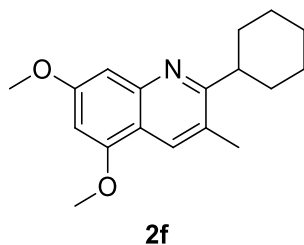

**2-Cyclohexyl-5,7-dimethoxy-3-methylquinoline (2f).** A 1,2-dichloroethane (1.5 mL) solution of complex **1** (11 mg, 5 mol %), 3,5-dimethoxyaniline (46 mg, 0.3 mmol), cyclohexanecarbaldehyde (34 mg, 0.3 mmol) and triallylamine (41 mg, 0.3 mmol) was stirred at 125 °C for 20 h. The product **2f** was isolated using column chromatography on silica gel (hexanes/EtOAc = 100:1 to 95:5). Yield: 38 mg (45%). Data for **2f**:  $^1\text{H NMR}$  (400 MHz,  $\text{CDCl}_3$ )  $\delta$  8.10 (s, 1H), 6.97 (s, 1H), 6.43 (d,  $J = 2.0$  Hz, 1H), 3.96-3.91 (m, 6H), 2.97 (m, 1H), 2.46 (s, 3H), 1.93-1.76 (m, 7H), 1.49-1.37 (m, 3H) ppm;  $^{13}\text{C}\{^1\text{H}\}$  NMR (101 MHz,  $\text{CDCl}_3$ )  $\delta$  166.4, 160.2, 155.5, 148.9, 130.7, 125.8, 115.1, 99.5, 97.3, 55.8, 55.7, 42.8, 31.9, 27.0, 26.2, 19.2 ppm; GC-MS for  $\text{C}_{18}\text{H}_{23}\text{NO}_2$ ,  $m/z = 285$  ( $\text{M}^+$ ); HRMS (ESI-TOF) Calcd for  $\text{C}_{18}\text{H}_{24}\text{NO}_2$  ( $[\text{M} + \text{H}]^+$ ) 286.1802, Found 286.1803.

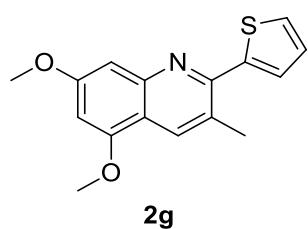

**5,7-Dimethoxy-3-methyl-2-(thiophen-2-yl)quinoline (2g).** A 1,2-dichloroethane (1.5 mL) solution of complex **1** (11 mg, 5 mol %), 3,5-dimethoxyaniline (46 mg, 0.3 mmol), thiophene-2-carbaldehyde (34 mg, 0.3 mmol) and triallylamine (41 mg, 0.3 mmol) was stirred at 125 °C for 20 h. The product **2g** was isolated using column chromatography on silica gel (hexanes/EtOAc = 100:1 to 95:5). Yield: 44 mg (51%).

Data for **2g**:  $^1\text{H}$  NMR (400 MHz,  $\text{CDCl}_3$ )  $\delta$  8.23 (s, 1H), 7.58 (dd,  $J = 3.8, 1.2$  Hz, 1H), 7.46 (dd,  $J = 5.1, 1.1$  Hz, 1H), 7.15 (dd,  $J = 5.2, 3.6$  Hz, 1H), 7.00 (d,  $J = 2.2$  Hz, 1H), 6.45 (d,  $J = 2.2$  Hz, 1H), 3.94 (d,  $J = 3.5$  Hz, 6H), 2.67 (s, 3H) ppm;  $^{13}\text{C}\{^1\text{H}\}$  NMR (101 MHz,  $\text{CDCl}_3$ )  $\delta$  160.9, 155.4, 152.9, 148.6, 145.5, 132.7, 128, 127.7, 127.7, 125, 115.6, 99.3, 98.1, 55.8, 55.7, 21.8 ppm; GC-MS for  $\text{C}_{16}\text{H}_{15}\text{NO}_2\text{S}$ ,  $m/z = 285$  ( $\text{M}^+$ ); HRMS (ESI-TOF) Calcd for  $\text{C}_{16}\text{H}_{16}\text{NO}_2\text{S}$  ( $[\text{M} + \text{H}]^+$ ) 286.0896, Found 286.0895.

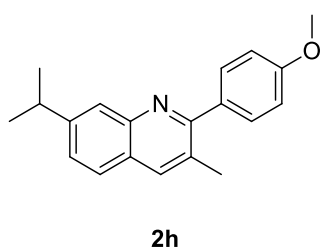

**7-Isopropyl-2-(4-methoxyphenyl)-3-methylquinoline (2h).** A 1,2-dichloroethane (1.5 mL) solution of complex **1** (11 mg, 5 mol %), 3-isopropylaniline (41 mg, 0.3 mmol), 4-methoxybenzaldehyde (41 mg, 0.3 mmol) and triallylamine (41 mg, 0.3 mmol) was stirred at 125 °C for 20 h. The product **2h** was isolated using column chromatography on silica gel (hexanes/EtOAc = 100:1 to 95:5). Yield: 27 mg (30%).

Data for **2h**:  $^1\text{H}$  NMR (400 MHz,  $\text{CDCl}_3$ )  $\delta$  8.0 (d,  $J = 9.0$  Hz, 2H), 7.7 (d,  $J = 8.5$  Hz, 1H), 7.6 (d,  $J = 8.3$  Hz, 2H), 7.4 (m, 1H), 7.0 (d,  $J = 8.3$  Hz, 2H), 3.9 (s, 3H), 3.2-3.1 (m, 1H), 2.5 (s, 3H), 1.4 (d,  $J = 6.8$  Hz, 6H) ppm;  $^{13}\text{C}\{^1\text{H}\}$  NMR (101 MHz,  $\text{CDCl}_3$ )  $\delta$  160.1, 159.7, 149.8, 147.0, 136.6, 133.7, 130.4, 128.5, 126.6, 126.5, 126.0, 125.4, 113.8, 55.5, 34.4, 23.9, 20.8 ppm; GC-MS for  $\text{C}_{21}\text{H}_{25}\text{NO}_2$ ,  $m/z = 291$  ( $\text{M}^+$ ); HRMS (ESI-TOF) Calcd for  $\text{C}_{21}\text{H}_{26}\text{NO}_2$  ( $[\text{M} + \text{H}]^+$ ) 292.1696, Found 292.1695.

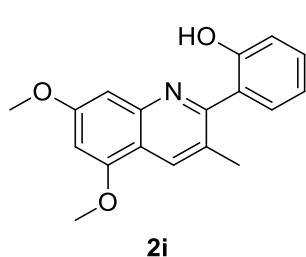

**2-(5,7-Dimethoxy-3-methylquinolin-2-yl)phenol (2i).** A 1,2-dichloroethane (1.5 mL) solution of complex **1** (11 mg, 5 mol %), 3,5-dimethoxyaniline (46 mg, 0.3 mmol), 2-hydroxybenzaldehyde (37 mg, 0.3 mmol) and triallylamine (41 mg, 0.3 mmol) was stirred at 125 °C for 20 h. The product **2i** was isolated using column chromatography on silica gel (hexanes/EtOAc = 100:1 to 95:5). Yield: 39 mg (44%).

Data for **2i**:  $^1\text{H}$  NMR (400 MHz,  $\text{CDCl}_3$ )  $\delta$  8.36 (s, 1H), 7.72-7.63 (m, 1H), 7.36-7.27 (m, 1H), 7.11 (d,  $J = 8.2$  Hz, 1H), 6.99-6.86 (m, 2H), 6.51-6.45 (m, 1H), 3.95 (d,  $J = 17.2$  Hz, 6H), 2.67 (s, 3H) ppm;  $^{13}\text{C}\{^1\text{H}\}$  NMR (101 MHz,  $\text{CDCl}_3$ )  $\delta$  161.5, 158.5, 158.2, 155.5, 146.1, 134.9, 130.9, 130.0, 126.3, 121.9, 118.4, 118.1, 115.5, 98.5, 97.9, 55.9, 55.8, 22.2 ppm; GC-MS for  $\text{C}_{18}\text{H}_{17}\text{NO}_3$ ,  $m/z = 295$  ( $\text{M}^+$ ); HRMS (ESI-TOF) Calcd for  $\text{C}_{18}\text{H}_{18}\text{NO}_3$  ( $[\text{M} + \text{H}]^+$ ) 296.1281, Found 296.1281.

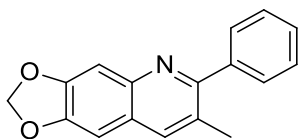

**2j**

**7-Methyl-6-phenyl-[1,3]dioxolo[4,5]quinoline (2j).** A 1,2-dichloroethane (1.5 mL) solution of complex **1** (11 mg, 5 mol %), benzo[1,3]dioxol-5-amine (41 mg, 0.3 mmol), benzaldehyde (32 mg, 0.3 mmol) and triallylamine (41 mg, 0.3 mmol) was stirred at 125 °C for 20 h. The product **2j** was isolated using column chromatography on silica gel (hexanes/EtOAc = 100:1 to 95:5). Yield: 30 mg (38%). Data for **2j**:  $^1\text{H}$  NMR (400 MHz,  $\text{CDCl}_3$ )  $\delta$  7.82 (s, 1H), 7.60-7.37 (m, 6H), 7.02 (s, 1H), 6.09 (s, 2H), 2.41 (s, 3H) ppm;  $^{13}\text{C}\{^1\text{H}\}$  NMR (101 MHz,  $\text{CDCl}_3$ )  $\delta$  158.1, 150.2, 147.9, 144.7, 141.0, 136.1, 129.0, 128.4, 128.1, 127.4, 124.6, 105.9, 101.9, 101.7, 20.4 ppm; GC-MS for  $\text{C}_{17}\text{H}_{13}\text{NO}_2$ ,  $m/z = 263$  ( $\text{M}^+$ ); HRMS (ESI-TOF) Calcd for  $\text{C}_{17}\text{H}_{14}\text{NO}_2$  ( $[\text{M} + \text{H}]^+$ ) 264.1019, Found 264.1019.

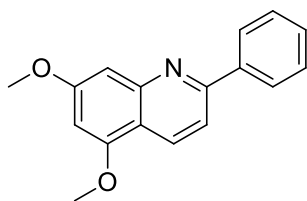

**2k**

**5,7-Dimethoxy-2-phenylquinoline (2k).** A 1,2-dichloroethane (1.5 mL) solution of complex **1** (11 mg, 5 mol %), 3,5-dimethoxyaniline (46 mg, 0.3 mmol), benzaldehyde (36 mg, 0.3 mmol) and triethylamine (30 mg, 0.3 mmol) was stirred at 125 °C for 20 h. The product **2k** was isolated using column chromatography on silica gel (hexanes/EtOAc = 100:1 to 95:5). Yield: 31 mg (40%). Data for **2k**:  $^1\text{H}$  NMR (400 MHz,  $\text{CDCl}_3$ )  $\delta$  8.47 (dt,  $J = 8.6, 1.1$  Hz, 1H), 8.13 (dt,  $J = 8.2, 1.2$  Hz, 2H), 7.68 (dd,  $J = 8.7, 1.3$  Hz, 1H), 7.55-7.48 (m, 2H), 7.48-7.42 (m, 1H), 7.37-7.30 (m, 1H), 7.12 (dd,  $J = 2.2, 1.2$  Hz, 1H), 6.50 (t,  $J = 1.7$  Hz, 1H), 3.96 (d,  $J = 1.3$  Hz, 6H) ppm;  $^{13}\text{C}\{^1\text{H}\}$  NMR 101 MHz,  $\text{CDCl}_3$ )  $\delta$  161.6, 158.1, 156.0, 131.7, 129.3, 128.9, 127.6, 116.1, 115.7, 100.0, 98.1, 92.1, 90.4, 55.9, 55.8 ppm; GC-MS for  $\text{C}_{17}\text{H}_{15}\text{NO}_2$ ,  $m/z = 265$  ( $\text{M}^+$ );  $^1\text{H}$  and  $^{13}\text{C}$  NMR spectral data are in good agreement with the literature values.<sup>S5</sup>

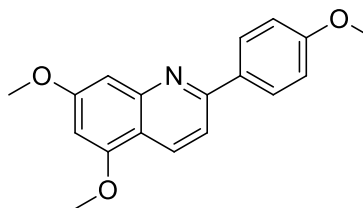

**2l**

**5,7-Dimethoxy-2-(4-methoxyphenyl)quinoline (2l).** A 1,2-dichloroethane (1.5 mL) solution of complex **1** (11 mg, 5 mol %), 3,5-dimethoxyaniline (46 mg, 0.3 mmol), 4-methoxybenzaldehyde (41 mg, 0.3 mmol) and triethylamine (30 mg, 0.3 mmol) was stirred at 125 °C for 20 h. The product **2l** was isolated using column chromatography on silica gel (hexanes/EtOAc = 100:1 to 95:5). Yield: 51 mg (57%). Data for **2l**:  $^1\text{H}$  NMR (400 MHz,  $\text{CDCl}_3$ )  $\delta$  8.45 (d,  $J = 8.7$  Hz, 1H), 8.15-8.05 (m, 2H), 7.65 (d,  $J = 8.7$  Hz, 1H), 7.10 (s, 1H), 7.03 (d,  $J = 8.8$  Hz, 2H), 6.48 (d,  $J = 2.2$  Hz, 1H), 3.97 (d,  $J = 4.6$  Hz, 6H), 3.88 (s, 3H) ppm;  $^{13}\text{C}\{^1\text{H}\}$  NMR (101 MHz,  $\text{CDCl}_3$ )  $\delta$  161.6, 160.9, 157.6, 156.1, 150.3, 132.2, 131.7, 129.0, 115.6, 115.4, 114.3, 99.9, 97.8, 55.9, 55.8, 55.5 ppm; GC-MS for  $\text{C}_{18}\text{H}_{17}\text{NO}_3$ ,  $m/z = 295$  ( $\text{M}^+$ ); HRMS (ESI-TOF) Calcd for  $\text{C}_{18}\text{H}_{18}\text{NO}_3$  ( $[\text{M} + \text{H}]^+$ ) 296.1281, Found 296.1266.

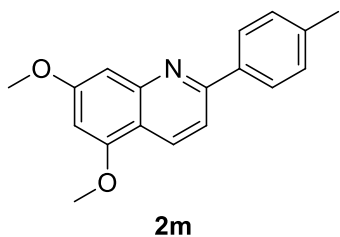

**5,7-Dimethoxy-2-(*p*-tolyl)quinoline (2m).** A 1,2-dichloroethane (1.5 mL) solution of complex **1** (11 mg, 5 mol %), 3,5-dimethoxyaniline (46 mg, 0.3 mmol), 4-methylbenzaldehyde (36 mg, 0.3 mmol) and triethylamine (30 mg, 0.3 mmol) was stirred at 125 °C for 20 h. The product **2m** was isolated using column chromatography on silica gel (hexanes/EtOAc = 100:1 to 95:5). Yield: 35 mg (42%).

Data for **2m**:  $^1\text{H}$  NMR (400 MHz,  $\text{CDCl}_3$ )  $\delta$  8.45 (dd,  $J = 8.7, 2.4$  Hz, 1H), 8.08-8.00 (m, 2H), 7.66 (dd,  $J = 8.7, 2.3$  Hz, 1H), 7.35-7.28 (m, 2H), 7.10 (s, 1H), 6.48 (s, 1H), 3.96 (s, 6H), 2.43 (s, 3H) ppm;  $^{13}\text{C}\{^1\text{H}\}$  NMR (101 MHz,  $\text{CDCl}_3$ )  $\delta$  161.4, 158.1, 156.0, 150.5, 139.3, 137.1, 131.4, 129.6, 127.5, 115.8, 115.5, 100.1, 97.8, 55.8, 55.7, 21.4 ppm; GC-MS for  $\text{C}_{18}\text{H}_{17}\text{NO}_2$ ,  $m/z = 279$  ( $\text{M}^+$ ); HRMS (ESI-TOF) Calcd for  $\text{C}_{18}\text{H}_{18}\text{NO}_2$  ( $[\text{M} + \text{H}]^+$ ) 280.1332, Found 280.1335.

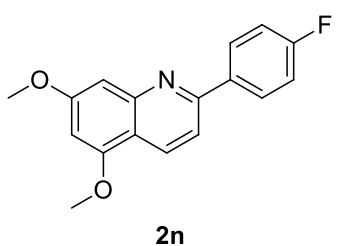

**2-(4-Fluorophenyl)-5,7-dimethoxyquinoline (2n).** A 1,2-dichloroethane (1.5 mL) solution of complex **1** (11 mg, 5 mol %), 3,5-dimethoxyaniline (46 mg, 0.3 mmol), 4-fluorobenzaldehyde (37 mg, 0.3 mmol) and triethylamine (30 mg, 0.3 mmol) was stirred at 125 °C for 20 h. The product **2n** was isolated using column chromatography on silica gel (hexanes/EtOAc = 100:1 to 95:5). Yield: 44 mg (52%).

Data for **2n**:  $^1\text{H}$  NMR (400 MHz,  $\text{CDCl}_3$ )  $\delta$  8.48 (dd,  $J = 8.6, 0.8$  Hz, 1H), 8.19-8.05 (m, 2H), 7.64 (d,  $J = 8.6$  Hz, 1H), 7.24-7.14 (m, 2H), 7.10 (d,  $J = 2.1$  Hz, 1H), 6.51 (d,  $J = 2.2$  Hz, 1H), 3.97 (d,  $J = 6.2$  Hz, 6H) ppm;  $^{13}\text{C}\{^1\text{H}\}$  NMR (101 MHz,  $\text{CDCl}_3$ )  $\delta$  165.1, 162.6, 161.8, 157.0, 156.1, 150.4, 131.9, 129.6, 129.5, 115.9, 115.7 (d,  $J_{\text{CF}} = 1.7$  Hz), 99.9, 98.2, 55.9, 55.8 ppm;  $^{19}\text{F}$  NMR (376 MHz,  $\text{CDCl}_3$ )  $\delta$  -112.79 ppm; GC-MS for  $\text{C}_{17}\text{H}_{14}\text{FNO}_2$ ,  $m/z = 283$  ( $\text{M}^+$ ); HRMS (ESI-TOF) Calcd for  $\text{C}_{17}\text{H}_{15}\text{FNO}_2$  ( $[\text{M} + \text{H}]^+$ ) 284.1081, Found 284.1089.

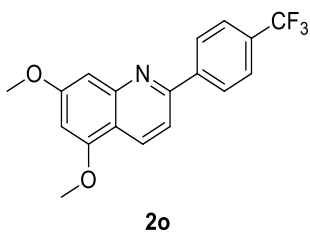

**5,7-Dimethoxy-2-(4-(trifluoromethyl)phenyl)quinoline (2o).** A 1,2-dichloroethane (1.5 mL) solution of complex **1** (11 mg, 5 mol %), 3,5-dimethoxyaniline (46 mg, 0.3 mmol), 4-(trifluoromethyl)benzaldehyde (52 mg, 0.3 mmol) and triethylamine (30 mg, 0.3 mmol) was stirred at 125 °C for 20 h. The product **2o** was isolated using column chromatography on silica gel (hexanes/EtOAc = 100:1 to 95:5). Yield: 53 mg (53%).

Data for **2o**:  $^1\text{H}$  NMR (400 MHz,  $\text{CDCl}_3$ )  $\delta$  8.52 (d,  $J = 8.6$  Hz, 1H), 8.24 (d,  $J = 8.2$  Hz, 2H), 7.76 (d,  $J = 8.1$  Hz, 2H), 7.70 (d,  $J = 8.6$  Hz, 1H), 7.09 (s, 1H), 6.53 (s, 1H), 3.98 (d,  $J = 7.3$  Hz, 6H) ppm;  $^{13}\text{C}\{^1\text{H}\}$  NMR (101 MHz,  $\text{CDCl}_3$ )  $\delta$  161.9, 156.4, 156.0, 150.5, 143.1, 132.0, 127.9, 126.8, 125.8 (dd,  $J_{\text{CF}} = 7.6, 4.0$  Hz), 123.0, 116.1, 115.9, 100.0, 98.6, 55.9, 55.8 ppm;  $^{19}\text{F}$  NMR (376 MHz,  $\text{CDCl}_3$ )  $\delta$  -61.79 ppm; GC-MS for  $\text{C}_{18}\text{H}_{14}\text{F}_3\text{NO}_2$ ,  $m/z = 333$  ( $\text{M}^+$ ); HRMS (ESI-TOF) Calcd for  $\text{C}_{18}\text{H}_{15}\text{F}_3\text{NO}_2$  ( $[\text{M} + \text{H}]^+$ ) 334.1049, Found 334.1055.



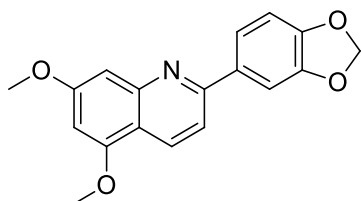

**2p**

**2-(Benzo[1,3]dioxol-5-yl)-5,7-dimethoxyquinoline (2p).** A 1,2-dichloroethane (1.5 mL) solution of complex **1** (11 mg, 5 mol %), 3,5-dimethoxyaniline (46 mg, 0.3 mmol), benzo[1,3]dioxole-5-carbaldehyde (45 mg, 0.3 mmol) and triethylamine (30 mg, 0.3 mmol) was stirred at 125 °C for 20 h. The product **2p** was isolated using column chromatography on silica gel (hexanes/EtOAc = 100:1 to 95:5). Yield: 41 mg (44%). Data for **2p**:  $^1\text{H}$  NMR (400 MHz,  $\text{CDCl}_3$ )  $\delta$  8.45 (d,  $J = 8.7$  Hz, 1H), 7.69 (d,  $J = 1.7$  Hz, 1H), 7.64 (dd,  $J = 8.1, 1.8$  Hz, 1H), 7.60 (d,  $J = 8.7$  Hz, 1H), 7.12 (s, 1H), 6.94 (d,  $J = 8.1$  Hz, 1H), 6.49 (d,  $J = 2.2$  Hz, 1H), 6.04 (s, 2H), 3.97 (d,  $J = 4.7$  Hz, 6H) ppm;  $^{13}\text{C}\{^1\text{H}\}$  (101 MHz,  $\text{CDCl}_3$ )  $\delta$  161.7, 157.4, 156.1, 148.9, 148.4, 131.8, 122.0, 115.7, 115.5, 108.6, 108.1, 101.5, 99.8, 98.1, 55.9, 55.8 ppm; GC-MS for  $\text{C}_{18}\text{H}_{15}\text{NO}_4$ ,  $m/z = 309$  ( $\text{M}^+$ ); HRMS (ESI-TOF) Calcd for  $\text{C}_{18}\text{H}_{16}\text{NO}_4$  ( $[\text{M} + \text{H}]^+$ ) 310.1074, Found 310.1081.

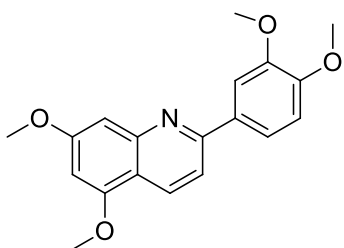

**2q**

**2-(3,4-Dimethoxyphenyl)-5,7-dimethoxyquinoline (2q).** A 1,2-dichloroethane (1.5 mL) solution of complex **1** (11 mg, 5 mol %), 3,5-dimethoxyaniline (46 mg, 0.3 mmol), 3,4-dimethoxybenzaldehyde (50 mg, 0.3 mmol) and triethylamine (30 mg, 0.3 mmol) was stirred at 125 °C for 20 h. The product **2q** was isolated using column chromatography on silica gel (hexanes/EtOAc = 100:1 to 95:5). Yield: 43 mg (44%). Data for **2q**:  $^1\text{H}$  NMR (400 MHz,  $\text{CDCl}_3$ )  $\delta$  8.45 (d,  $J = 8.7$  Hz, 1H), 7.83 (d,  $J = 2.0$  Hz, 1H), 7.68-7.62 (m, 2H), 7.10 (d,  $J = 2.0$  Hz, 1H), 6.98 (d,  $J = 8.4$  Hz, 1H), 6.49 (d,  $J = 2.2$  Hz, 1H), 4.05 (s, 3H), 3.99-3.94 (m, 9H) ppm;  $^{13}\text{C}\{^1\text{H}\}$  NMR (101 MHz,  $\text{CDCl}_3$ )  $\delta$  161.8, 157.4, 156.1, 150.5, 149.4, 131.9, 120.5, 115.6, 115.4, 111.1, 110.6, 99.7, 98.0, 56.2, 56.1, 55.9, 55.8 ppm; GC-MS for  $\text{C}_{19}\text{H}_{19}\text{NO}_4$ ,  $m/z = 325$  ( $\text{M}^+$ ); HRMS (ESI-TOF) Calcd for  $\text{C}_{19}\text{H}_{20}\text{NO}_4$  ( $[\text{M} + \text{H}]^+$ ) 326.1387, Found 326.1391.

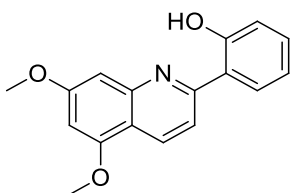

**2r**

**2-(5,7-Dimethoxyquinolin-2-yl)phenol (2r).** A 1,2-dichloroethane (1.5 mL) solution of complex **1** (11 mg, 5 mol %), 3,5-dimethoxyaniline (46 mg, 0.3 mmol), salicylaldehyde (37 mg, 0.3 mmol) and triethylamine (30 mg, 0.3 mmol) was stirred at 125 °C for 20 h. The product **2r** was isolated using column chromatography on silica gel (hexanes/EtOAc = 100:1 to 95:5). Yield: 45 mg (53%). Data for **2r**:  $^1\text{H}$  NMR (400 MHz,  $\text{CDCl}_3$ )  $\delta$  8.50 (d,  $J = 8.9$  Hz, 1H), 7.92 (dd,  $J = 8.1, 1.6$  Hz, 1H), 7.82 (d,  $J = 8.9$  Hz, 1H), 7.35 (dd,  $J = 8.5, 1.6$  Hz, 1H), 7.10 (d,  $J = 8.2$  Hz, 1H), 6.98-6.87 (m, 2H), 6.49 (d,  $J = 2.1$  Hz, 1H), 3.96 (d,  $J = 7.9$  Hz, 6H) ppm;  $^{13}\text{C}\{^1\text{H}\}$  NMR (101 MHz,  $\text{CDCl}_3$ )  $\delta$  162.3, 160.9, 158.2, 156.1, 146.6, 132.5, 131.9, 127.0, 118.9, 118.7, 118.7, 114.9, 113.9, 98.3, 97.9, 55.8, 55.8 ppm; GC-MS for  $\text{C}_{17}\text{H}_{15}\text{NO}_3$ ,  $m/z = 281$  ( $\text{M}^+$ ); HRMS (ESI-TOF) Calcd for  $\text{C}_{17}\text{H}_{16}\text{NO}_3$  ( $[\text{M} + \text{H}]^+$ ) 282.1125, Found 282.1129.

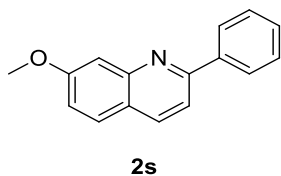

**7-Methoxy-2-phenylquinoline (2s).** A 1,2-dichloroethane (1.5 mL) solution of complex **1** (11 mg, 5 mol %), 3-methoxyaniline (37 mg, 0.3 mmol), benzaldehyde (32 mg, 0.3 mmol) and triethylamine (30 mg, 0.3 mmol) was stirred at 125 °C for 20 h. The product **2s** was isolated using column chromatography on silica gel (hexanes/EtOAc = 100:1 to 95:5). Yield: 26 mg (37%). Data for **2s**:  $^1\text{H}$  NMR (400 MHz,  $\text{CDCl}_3$ )  $\delta$  8.15 (m, 3H), 7.73 (dd,  $J = 8.5$ , 7.3 Hz, 2H), 7.62-7.58 (m, 1H), 7.51 (dt,  $J = 13.0$ , 6.9 Hz, 3H), 7.20 (dd,  $J = 8.9$ , 2.4 Hz, 1H), 3.99 (s, 3H) ppm;  $^{13}\text{C}\{^1\text{H}\}$  NMR (101 MHz,  $\text{CDCl}_3$ )  $\delta$  161.3, 157.6, 137.0, 137.0, 129.5, 129.0, 128.6, 127.8, 122.6, 119.9, 117.1, 107.4, 106.4, 55.8 ppm; GC-MS for  $\text{C}_{16}\text{H}_{13}\text{NO}$ ,  $m/z = 235$  ( $\text{M}^+$ ); HRMS (ESI-TOF) Calcd for  $\text{C}_{16}\text{H}_{14}\text{NO}$  ( $[\text{M} + \text{H}]^+$ ) 236.10699, Found 236.1075.

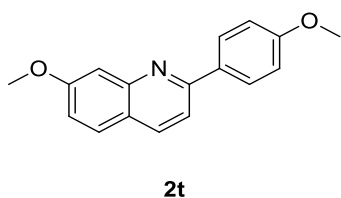

**7-Methoxy-2-(4-methoxyphenyl)quinoline (2t).** A 1,2-dichloroethane (1.5 mL) solution of complex **1** (11 mg, 5 mol %), 3-methoxyaniline (37 mg, 0.3 mmol), 4-methoxybenzaldehyde (41 mg, 0.3 mmol) and triethylamine (30 mg, 0.3 mmol) was stirred at 125 °C for 20 h. The product **2t** was isolated using column chromatography on silica gel (hexanes/EtOAc = 100:1 to 95:5). Yield: 25 mg (31%). Data for **2t**:  $^1\text{H}$  NMR (400 MHz,  $\text{CDCl}_3$ )  $\delta$  8.10 (dd,  $J = 12.4$ , 8.7 Hz, 3H), 7.68 (dd,  $J = 8.8$ , 4.8 Hz, 2H), 7.48 (s, 1H), 7.15 (dd,  $J = 8.9$ , 2.4 Hz, 1H), 7.04 (d,  $J = 8.6$  Hz, 2H), 3.98 (s, 3H), 3.88 (s, 3H) ppm;  $^{13}\text{C}\{^1\text{H}\}$  NMR (101 MHz,  $\text{CDCl}_3$ )  $\delta$  161.1, 160.9, 158.7, 157.2, 149.8, 136.7, 129.1, 128.6, 122.2, 119.3, 116.6, 114.3, 107.3, 55.7, 55.5 ppm; GC-MS for  $\text{C}_{17}\text{H}_{13}\text{NO}_3$ ,  $m/z = 279$  ( $\text{M}^+$ );  $^1\text{H}$  and  $^{13}\text{C}$  NMR spectral data are in good agreement with the literature values.<sup>S6</sup>

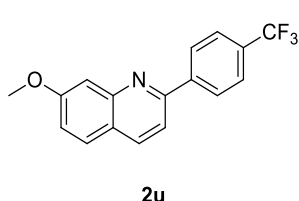

**7-Methoxy-2-(4-(trifluoromethyl)phenyl)quinoline (2u).** A 1,2-dichloroethane (1.5 mL) solution of complex **1** (11 mg, 5 mol %), 3-methoxyaniline (37 mg, 0.3 mmol), 4-(trifluoromethyl)benzaldehyde (52 mg, 0.3 mmol) and triethylamine (30 mg, 0.3 mmol) was stirred at 125 °C for 20 h. The product **2u** was isolated using column chromatography on silica gel (hexanes/EtOAc = 100:1 to 95:5). Yield: 37 mg (41%). Data for **2u**:  $^1\text{H}$  NMR (400 MHz,  $\text{CDCl}_3$ )  $\delta$  8.26 (d,  $J = 8.2$  Hz, 2H), 8.18 (d,  $J = 8.5$  Hz, 1H), 7.79 (s, 1H), 7.77-7.74 (m, 2H), 7.72 (d,  $J = 3.2$  Hz, 1H), 7.54 (d,  $J = 2.0$  Hz, 1H), 7.22 (dd,  $J = 8.9$ , 2.4 Hz, 1H), 3.99 (s, 3H) ppm;  $^{13}\text{C}\{^1\text{H}\}$  NMR (101 MHz,  $\text{CDCl}_3$ )  $\delta$  161.4, 156.0, 150.0, 143.1, 139.3, 137.0, 128.7, 128.0, 125.8 (dd,  $J_{\text{CF}} = 7.9$ , 4.0 Hz), 122.9, 120.4, 116.9, 107.6, 106.2, 55.8 ppm;  $^{19}\text{F}$  NMR (376 MHz,  $\text{CDCl}_3$ )  $\delta$  -62.69 ppm; GC-MS for  $\text{C}_{17}\text{H}_{12}\text{F}_3\text{NO}$ ,  $m/z = 303$  ( $\text{M}^+$ ); HRMS (ESI-TOF) Calcd for  $\text{C}_{17}\text{H}_{13}\text{F}_3\text{NO}$  ( $[\text{M} + \text{H}]^+$ ) 304.0944, Found 304.0945.

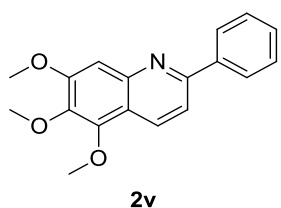

**5,6,7-Trimethoxy-2-phenylquinoline (2v).** A 1,2-dichloroethane (1.5 mL) solution of complex **1** (11 mg, 5 mol %), 3,4,5-trimethoxyaniline (55 mg, 0.3 mmol), benzaldehyde (46 mg, 0.3 mmol) and triethylamine (30 mg, 0.3 mmol) was stirred at 125 °C for 20 h. The product **2v** was isolated using column chromatography on silica gel (hexanes/EtOAc

= 100:1 to 95:5). Yield: 35 mg (39%). Data for **2v**:  $^1\text{H}$  NMR (400 MHz,  $\text{CDCl}_3$ )  $\delta$  8.43 (d,  $J = 8.7$  Hz, 1H), 8.11 (d,  $J = 7.0$  Hz, 2H), 7.73 (d,  $J = 8.7$  Hz, 1H), 7.48 (dt,  $J = 23.2, 8.2$  Hz, 4H), 4.09 (s, 3H), 4.04 (s, 3H), 4.00 (s, 3H) ppm;  $^{13}\text{C}\{^1\text{H}\}$  NMR (101 MHz,  $\text{CDCl}_3$ )  $\delta$  156.9, 156.4, 147.1, 145.8, 142.7, 140.9, 131.6, 129.4, 129.0, 127.6, 118.3, 116.9, 104.3, 61.8, 61.4, 56.3 ppm; GC-MS for  $\text{C}_{18}\text{H}_{17}\text{NO}_3$ ,  $m/z = 295$  ( $\text{M}^+$ ); HRMS (ESI-TOF) Calcd for  $\text{C}_{18}\text{H}_{18}\text{NO}_3$  ( $[\text{M} + \text{H}]^+$ ) 296.1281, Found 296.1294.

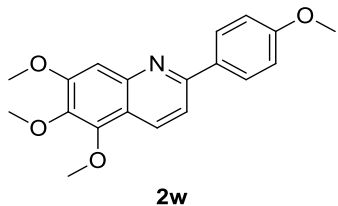

**5,6,7-Trimethoxy-2-(4-methoxyphenyl)quinoline (2w).** A 1,2-dichloroethane (1.5 mL) solution of complex **1** (11 mg, 5 mol %), 3,4,5-trimethoxyaniline (55 mg, 0.3 mmol), 4-methoxybenzaldehyde (41 mg, 0.3 mmol) and triethylamine (30 mg, 0.3 mmol) was stirred at 125 °C for 20 h. The product **2w** was isolated using column chromatography on silica gel (hexanes/EtOAc = 100:1 to 95:5). Yield: 49 mg (50%).

Data for **2w**:  $^1\text{H}$  NMR (400 MHz,  $\text{CDCl}_3$ )  $\delta$  8.39 (d,  $J = 8.6$  Hz, 1H), 8.10 (d,  $J = 8.6$  Hz, 2H), 7.69 (d,  $J = 8.6$  Hz, 1H), 7.16 (d,  $J = 8.5$  Hz, 1H), 7.04 (d,  $J = 8.6$  Hz, 2H), 4.08 (s, 3H), 4.03 (s, 3H), 3.99 (s, 3H), 3.88 (s, 3H) ppm;  $^{13}\text{C}\{^1\text{H}\}$  NMR (101 MHz,  $\text{CDCl}_3$ )  $\delta$  161.1, 154.0, 147.1, 144.9, 140.7, 130.5, 129.1, 128.1, 118.0, 116.4, 114.4, 114.2, 103.9, 61.8, 61.4, 61.2, 56.4 ppm; GC-MS for  $\text{C}_{19}\text{H}_{19}\text{NO}_4$ ,  $m/z = 325$  ( $\text{M}^+$ ); HRMS (ESI-TOF) Calcd for  $\text{C}_{19}\text{H}_{20}\text{NO}_4$  ( $[\text{M} + \text{H}]^+$ ) 326.1386, Found 326.1402.

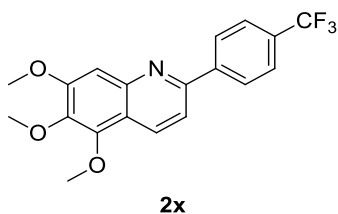

**5,6,7-Trimethoxy-2-(4-(trifluoromethyl)phenyl)quinoline (2x).** A 1,2-dichloroethane (1.5 mL) solution of complex **1** (11 mg, 5 mol %), 3,4,5-trimethoxyaniline (55 mg, 0.3 mmol), 4-(trifluoromethyl)benzaldehyde (52 mg, 0.3 mmol) and triethylamine (30 mg, 0.3 mmol) was stirred at 125 °C for 20 h. The product **2x** was isolated using column chromatography on silica gel (hexanes/EtOAc = 100:1 to 95:5). Yield: 47 mg (43%).

Data for **2x**:  $^1\text{H}$  NMR (400 MHz,  $\text{CDCl}_3$ )  $\delta$  8.45 (d,  $J = 8.6$  Hz, 1H), 8.22 (d,  $J = 8.0$  Hz, 2H), 7.80 – 7.69 (m, 3H), 7.33 (s, 1H), 4.09 (s, 3H), 4.04 (s, 3H), 4.01 (s, 3H) ppm;  $^{13}\text{C}\{^1\text{H}\}$  NMR (101 MHz,  $\text{CDCl}_3$ )  $\delta$  156.5, 155.3, 147.0, 146.2, 143.2, 141.2, 131.6, 131.1, 130.8, 127.8, 125.8 (dd,  $J_{\text{CF}} = 7.5, 4.0$  Hz), 118.7, 116.7, 104.5, 61.8, 61.4, 56.3 ppm;  $^{19}\text{F}$  NMR (376 MHz,  $\text{CDCl}_3$ )  $\delta$  -62.62 ppm; GC-MS for  $\text{C}_{19}\text{H}_{16}\text{F}_3\text{NO}_3$ ,  $m/z = 363$  ( $\text{M}^+$ ); HRMS (ESI-TOF) Calcd for  $\text{C}_{19}\text{H}_{17}\text{F}_3\text{NO}_3$  ( $[\text{M} + \text{H}]^+$ ) 364.1155, Found 364.1156.

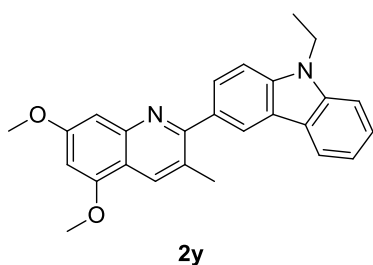

**3-(5,7-Dimethoxy-3-methylquinolin-2-yl)-9-ethyl-9H-carbazole (2y).** A 1,2-dichloroethane (1.5 mL) solution of complex **1** (11 mg, 5 mol %), 3,5-dimethoxyaniline (46 mg, 0.3 mmol), 9-ethyl-9H-carbazole-3-carbaldehyde (67 mg, 0.3 mmol) and triallylamine (41 mg, 0.3 mmol) was stirred at 125 °C for 20 h. The product **2y** was isolated using column chromatography on silica gel (hexanes/EtOAc = 100:1 to 95:5). Yield: 53 mg (44%).

Data for **2y**:  $^1\text{H}$  NMR (400 MHz,  $\text{CDCl}_3$ )  $\delta$  8.34 (d,  $J = 6.3$  Hz, 2H), 8.14 (d,  $J = 7.8$  Hz, 1H), 7.73 (dd,  $J = 8.4, 1.4$  Hz, 1H), 7.49 (dd,  $J = 15.0, 7.9$  Hz, 3H), 7.26-7.23 (m, 1H), 7.16-7.10 (m, 1H), 6.52 (d,  $J = 1.9$  Hz, 1H), 4.43 (q,  $J = 7.3$  Hz, 2H), 4.01

(s, 3H), 3.94 (s, 3H), 2.53 (s, 3H), 1.47 (t,  $J = 7.2$  Hz, 3H) ppm;  $^{13}\text{C}\{^1\text{H}\}$  NMR (101 MHz,  $\text{CDCl}_3$ )  $\delta$  161.8, 160.7, 155.6, 148.8, 140.5, 139.9, 132.0, 131.8, 127.0, 126.4, 125.8, 123.3, 123.0, 121.3, 120.8, 119.1, 115.8, 108.7, 108.3, 99.8, 97.9, 55.9, 55.7, 37.8, 21.0, 14.0 ppm; GC-MS for  $\text{C}_{22}\text{H}_{26}\text{N}_2\text{O}_2$ ,  $m/z = 396$  ( $\text{M}^+$ ); HRMS (ESI-TOF) Calcd for  $\text{C}_{22}\text{H}_{27}\text{N}_2\text{O}_2$  ( $[\text{M} + \text{H}]^+$ ) 397.1911, Found 397.1908.

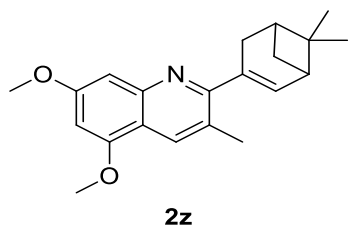

**2z**

**2-(6,6-Dimethylbicyclo[3.1.1]hept-2-en-3-yl)-5,7-dimethoxy-3-methylquinoline (2z).**

A 1,2-dichloroethane (1.5 mL) solution of complex **1** (11 mg, 5 mol %), 3,5-dimethoxyaniline (46 mg, 0.3 mmol), myrtenal (50 mg, 0.3 mmol) and triallylamine (41 mg, 0.3 mmol) was stirred at 125 °C for 20 h. The product **2z** was isolated using column chromatography on silica gel (hexanes/EtOAc = 100:1 to 95:5). Yield: 37 mg (38%). Data for **2z**:  $^1\text{H}$  NMR (400 MHz,  $\text{CDCl}_3$ )  $\delta$  8.13 (s, 1H), 7.00 (d,  $J = 2.1$  Hz, 1H), 6.43 (d,  $J = 2.2$  Hz, 1H), 5.95 (m, 1H), 3.92 (d,  $J = 8.1$  Hz, 6H), 2.69 (m, 1H), 2.58 (m, 1H), 2.51 (m, 2H), 2.42 (d,  $J = 0.8$  Hz, 3H), 2.21 (m, 1H), 1.53 (d,  $J = 8.7$  Hz, 1H), 1.37 (s, 3H), 1.09 (s, 3H) ppm;  $^{13}\text{C}\{^1\text{H}\}$  NMR (101 MHz,  $\text{CDCl}_3$ ) 161.2, 160.3, 155.4, 149.1, 148.7, 131.3, 125.7, 124.9, 115.5, 99.9, 97.6, 55.8, 55.7, 46.2, 40.7, 38.3, 32.3, 32.1, 26.5, 21.8, 20.4 ppm; GC-MS for  $\text{C}_{21}\text{H}_{25}\text{NO}_2$ ,  $m/z = 323$  ( $\text{M}^+$ ); HRMS (ESI-TOF) Calcd for  $\text{C}_{21}\text{H}_{26}\text{NO}_2$  ( $[\text{M} + \text{H}]^+$ ) 324.1958, Found 324.1955.

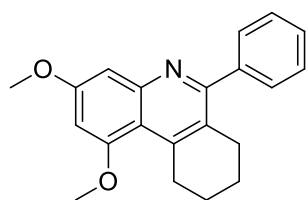

**3a**

**1,3-Dimethoxy-6-phenyl-7,8,9,10-tetrahydrophenanthridine (3a).**

A 1,2-dichloroethane (1.5 mL) solution of complex **1** (11 mg, 5 mol %), 3,5-dimethoxyaniline (46 mg, 0.3 mmol), benzaldehyde (36 mg, 0.3 mmol) and 4-(cyclohex-1-en-1-yl)morpholine (50 mg, 0.3 mmol) was stirred at 125 °C for 20 h. The product **3a** was isolated using column chromatography on silica gel (hexanes/EtOAc = 100:1 to 95:5). Yield: 32 mg (33%). Data for **3a**:  $^1\text{H}$  NMR (400 MHz,  $\text{CDCl}_3$ )  $\delta$  7.49-7.37 (m, 5H), 7.09 (s, 1H), 6.50 (s, 1H), 3.89 (s, 6H), 3.49 (t,  $J = 6.1$  Hz, 2H), 2.65 (t,  $J = 5.9$  Hz, 2H), 1.82 (p,  $J = 5.9$  Hz, 2H), 1.73-1.65 (m, 2H) ppm;  $^{13}\text{C}\{^1\text{H}\}$  NMR (101 MHz,  $\text{CDCl}_3$ )  $\delta$  161.0, 159.6, 158.6, 149.0, 145.2, 141.4, 128.6, 128.3, 127.9, 126.1, 115.6, 101.1, 98.9, 55.6, 55.6, 30.2, 29.2, 23.2, 22.3 ppm; GC-MS for  $\text{C}_{21}\text{H}_{21}\text{NO}_2$ ,  $m/z = 319$  ( $\text{M}^+$ ); HRMS (ESI-TOF) Calcd for  $\text{C}_{21}\text{H}_{22}\text{NO}_2$  ( $[\text{M} + \text{H}]^+$ ) 320.1645, Found 320.1660.

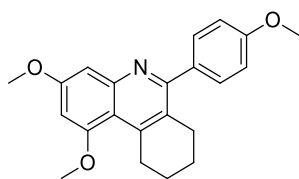

**3b**

**1,3-Dimethoxy-6-(4-methoxyphenyl)-7,8,9,10-tetrahydrophenanthridine (3b).**

A 1,2-dichloroethane (1.5 mL) solution of complex **1** (11 mg, 5 mol %), 3,5-dimethoxyaniline (46 mg, 0.3 mmol), benzaldehyde (36 mg, 0.3 mmol) and 4-(cyclohex-1-en-1-yl)morpholine (50 mg, 0.3 mmol) was stirred at 125 °C for 20 h. The product **3b** was isolated using column chromatography on silica gel (hexanes/EtOAc = 100:1 to 95:5). Yield: 58 mg (55%). Data for **3b**:  $^1\text{H}$  NMR (400 MHz,  $\text{CDCl}_3$ )  $\delta$  7.44 (d,  $J = 8.0$  Hz, 2H), 7.07 (s, 1H), 6.98 (d,  $J = 8.1$  Hz, 2H), 6.49 (d,  $J = 1.7$  Hz, 1H), 3.92-3.83 (m, 8H), 3.49 (t,  $J = 6.3$  Hz, 2H), 2.68 (t,  $J = 6.1$  Hz, 2H), 1.82 (m, 3H), 1.69 (m, 3H) ppm;  $^{13}\text{C}\{^1\text{H}\}$  NMR (101 MHz,  $\text{CDCl}_3$ )  $\delta$  160.7, 159.5, 159.4, 158.5,

149.2, 144.9, 130.0, 128.9, 126.3, 115.4, 113.7, 101.1, 98.7, 55.5, 55.5, 55.4, 30.1, 29.4, 23.2, 22.4 ppm; GC-MS for C<sub>22</sub>H<sub>23</sub>NO<sub>3</sub>, *m/z* = 349 (M<sup>+</sup>); HRMS (ESI-TOF) Calcd for C<sub>22</sub>H<sub>24</sub>NO<sub>3</sub> ([M + H]<sup>+</sup>) 350.1750, Found 350.1766.

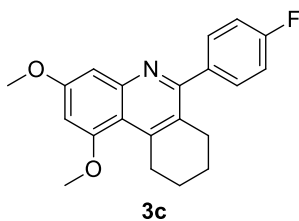

**6-(4-Fluorophenyl)-1,3-dimethoxy-7,8,9,10-tetrahydrophenanthridine (3c).** A 1,2-dichloroethane (1.5 mL) solution of complex **1** (11 mg, 5 mol %), 3,5-dimethoxyaniline (46 mg, 0.3 mmol), 4-fluorobenzaldehyde (37 mg, 0.3 mmol) and 4-(cyclohex-1-en-1-yl)morpholine (50 mg, 0.3 mmol) was stirred at 125 °C for 20 h. The product **3c** was isolated using column chromatography on silica gel (hexanes/EtOAc =

100:1 to 95:5). Yield: 64 mg (63%). Data for **3c**: <sup>1</sup>H NMR (400 MHz, CDCl<sub>3</sub>) δ 7.46 (dd, *J* = 8.4, 5.6 Hz, 2H), 7.13 (t, *J* = 8.7 Hz, 2H), 7.04 (d, *J* = 2.4 Hz, 1H), 6.50 (d, *J* = 2.4 Hz, 1H), 3.89 (s, 6H), 3.49 (t, *J* = 6.5 Hz, 2H), 2.63 (t, *J* = 6.3 Hz, 2H), 1.82 (m, 2H), 1.69 (m, 2H) ppm; <sup>13</sup>C{<sup>1</sup>H} NMR (101 MHz, CDCl<sub>3</sub>) δ 163.9, 161.4, 159.7, 158.6, 149.1, 145.3, 137.5, 130.6 (d, *J*<sub>CF</sub> = 8.3 Hz), 126.1, 115.6, 115.2 (d, *J*<sub>CF</sub> = 22.3 Hz), 101.0, 99.0, 55.6, 55.6, 30.2, 29.3, 23.1, 22.3 ppm; <sup>19</sup>F NMR (376 MHz, CDCl<sub>3</sub>) δ -113.68 ppm; GC-MS for C<sub>21</sub>H<sub>20</sub>FNO<sub>2</sub>, *m/z* = 337 (M<sup>+</sup>); HRMS (ESI-TOF) Calcd for C<sub>21</sub>H<sub>21</sub>FNO<sub>2</sub> ([M + H]<sup>+</sup>) 338.1551, Found 338.1547.

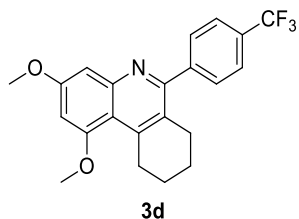

**1,3-Dimethoxy-6-(4-(trifluoromethyl)phenyl)-7,8,9,10-tetrahydrophenanthridine**

**(3d).** A 1,2-dichloroethane (1.5 mL) solution of complex **1** (11 mg, 5 mol %), 3,5-dimethoxyaniline (46 mg, 0.3 mmol), 4-(trifluoromethyl)benzaldehyde (52 mg, 0.3 mmol) and 4-(cyclohex-1-en-1-yl)morpholine (50 mg, 0.3 mmol) was stirred at 125 °C for 20 h. The product **3d** was isolated using column chromatography on silica gel

(hexanes/EtOAc = 100:1 to 95:5). Yield: 60 mg (52%). Data for **3d**: <sup>1</sup>H NMR (400 MHz, CDCl<sub>3</sub>) δ 7.71 (d, *J* = 8.1 Hz, 2H), 7.60 (d, *J* = 8.0 Hz, 2H), 7.03 (d, *J* = 2.2 Hz, 1H), 6.52 (d, *J* = 2.3 Hz, 1H), 3.90 (d, *J* = 6.6 Hz, 6H), 3.51 (t, *J* = 6.4 Hz, 2H), 2.62 (t, *J* = 6.1 Hz, 2H), 1.83 (dt, *J* = 12.3, 6.2 Hz, 2H), 1.71 (dt, *J* = 11.5, 6.0 Hz, 2H) ppm; <sup>13</sup>C{<sup>1</sup>H} NMR (101 MHz, CDCl<sub>3</sub>) δ 159.9, 159.6, 158.7, 149.3, 145.6, 145.3, 130.3, 129.9, 129.2, 125.8, 125.4 (dd, *J*<sub>CF</sub> = 7.4, 3.6 Hz), 115.9, 101.1, 99.3, 55.7, 55.6, 30.2, 29.2, 23.2, 22.3 ppm; <sup>19</sup>F NMR (376 MHz, CDCl<sub>3</sub>) δ -62.64 ppm; GC-MS for C<sub>22</sub>H<sub>20</sub>F<sub>3</sub>NO<sub>2</sub>, *m/z* = 387 (M<sup>+</sup>); HRMS (ESI-TOF) Calcd for C<sub>22</sub>H<sub>21</sub>F<sub>3</sub>NO<sub>2</sub> ([M + H]<sup>+</sup>) 388.1519, Found 388.1516.

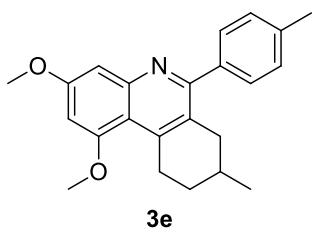

**1,3-Dimethoxy-8-methyl-6-(*p*-tolyl)-7,8,9,10-tetrahydrophenanthridine (3e).** A

1,2-dichloroethane (1.5 mL) solution of complex **1** (11 mg, 5 mol %), 3,5-dimethoxyaniline (46 mg, 0.3 mmol), 4-methylbenzaldehyde (36 mg, 0.3 mmol) and 4-(4-methylcyclohex-1-en-1-yl)morpholine (54 mg, 0.3 mmol) was stirred at 125 °C for 20 h. The product **3e** was isolated using column chromatography on silica gel

(hexanes/EtOAc = 100:1 to 95:5). Yield: 50 mg (48%). Data for **3e**: <sup>1</sup>H NMR (400 MHz, CDCl<sub>3</sub>) δ 7.37 (d, *J* = 8.0 Hz, 2H), 7.24 (s, 2H), 7.05 (s, 1H), 6.48 (d, *J* = 2.3 Hz, 1H), 3.89 (s, 6H), 3.70 (d, *J* = 19.5 Hz, 1H), 3.34 (dt, *J* = 18.8, 8.3 Hz, 1H), 2.68 (dd, *J* = 16.5, 5.4 Hz, 1H), 2.41 (s, 3H), 2.31 (dd, *J* = 16.2, 11.1 Hz, 1H), 1.98-1.85

(m, 1H), 1.68 (s, 1H), 1.42-1.30 (m, 1H), 0.98 (d,  $J = 4.9$  Hz, 3H) ppm;  $^{13}\text{C}\{^1\text{H}\}$  NMR (101 MHz,  $\text{CDCl}_3$ )  $\delta$  161.1, 159.6, 158.6, 149.3, 144.5, 138.7, 137.6, 129.0, 128.6, 126.0, 115.4, 101.2, 98.8, 55.6, 55.6, 37.6, 31.4, 30.2, 28.3, 21.9, 21.5 ppm; GC-MS for  $\text{C}_{23}\text{H}_{25}\text{NO}_2$ ,  $m/z = 347$  ( $\text{M}^+$ ); HRMS (ESI-TOF) Calcd for  $\text{C}_{23}\text{H}_{26}\text{NO}_2$  ( $[\text{M} + \text{H}]^+$ ) 348.1958, Found 348.1959.

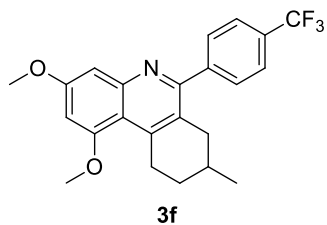

**1,3-Dimethoxy-8-methyl-6-(4-(trifluoromethyl)phenyl)-7,8,9,10-tetrahydropheanthridine (3f).** A 1,2-dichloroethane (1.5 mL) solution of complex **1** (11 mg, 5 mol %), 3,5-dimethoxyaniline (46 mg, 0.3 mmol), 4-(trifluoromethyl)benzaldehyde (52 mg, 0.3 mmol) and 4-(4-methylcyclohex-1-en-1-yl)morpholine (54 mg, 0.3 mmol) was stirred at 125 °C for 20 h. The product **3f** was isolated using column chromatography on silica gel (hexanes/EtOAc = 100:1 to 95:5). Yield: 54 mg (45%). Data for **3f**:

$^1\text{H}$  NMR (400 MHz,  $\text{CDCl}_3$ )  $\delta$  7.72 (d,  $J = 8.1$  Hz, 2H), 7.60 (d,  $J = 8.0$  Hz, 2H), 7.03 (s, 1H), 6.52 (d,  $J = 2.3$  Hz, 1H), 3.91 (d,  $J = 7.6$  Hz, 6H), 3.79-3.68 (m, 1H), 3.42-3.31 (m, 1H), 2.61 (dd,  $J = 17.0, 4.2$  Hz, 1H), 2.29 (dd,  $J = 16.7, 10.1$  Hz, 1H), 2.01-1.92 (m, 1H), 1.79-1.67 (m, 1H), 1.38 (m, 1H), 1.00 (d,  $J = 6.5$  Hz, 3H) ppm;  $^{13}\text{C}\{^1\text{H}\}$  NMR (101 MHz,  $\text{CDCl}_3$ )  $\delta$  160.0, 159.5, 158.7, 149.3, 145.2, 130.3, 130.0, 129.2, 125.5, 125.4 (dd,  $J_{\text{CF}} = 7.8, 3.8$  Hz), 123.0, 115.8, 101.1, 99.3, 55.7, 55.7, 37.5, 31.3, 30.2, 28.3, 21.9 ppm;  $^{19}\text{F}$  NMR (376 MHz,  $\text{CDCl}_3$ )  $\delta$  -62.43 ppm; GC-MS for  $\text{C}_{23}\text{H}_{22}\text{F}_3\text{NO}_2$ ,  $m/z = 401$  ( $\text{M}^+$ ); HRMS (ESI-TOF) Calcd for  $\text{C}_{23}\text{H}_{23}\text{F}_3\text{NO}_2$  ( $[\text{M} + \text{H}]^+$ ) 402.1675, Found 402.1671.

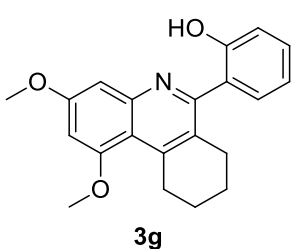

**2-(1,3-Dimethoxy-7,8,9,10-tetrahydrophenanthridin-6-yl)phenol (3g).** A 1,2-dichloroethane (1.5 mL) solution of complex **1** (11 mg, 5 mol %), 3,5-dimethoxyaniline (46 mg, 0.3 mmol), salicylaldehyde (37 mg, 0.3 mmol) and 4-(cyclohex-1-en-1-yl)morpholine (50 mg, 0.3 mmol) was stirred at 125 °C for 20 h. The product **3g** was isolated using column chromatography on silica gel (hexanes/EtOAc = 100:1 to 95:5).

Yield: 49 mg (49%). Data for **3g**:  $^1\text{H}$  NMR (400 MHz,  $\text{CDCl}_3$ )  $\delta$  7.52 (d,  $J = 7.8$  Hz, 1H), 7.30-7.24 (m, 1H), 7.04 (d,  $J = 8.2$  Hz, 1H), 6.94-6.86 (m, 2H), 6.47 (d,  $J = 2.4$  Hz, 1H), 3.90 (d,  $J = 9.8$  Hz, 6H), 3.54-3.43 (m, 2H), 2.92 (t,  $J = 6.1$  Hz, 2H), 1.86 (p,  $J = 6.5$  Hz, 2H), 1.65 (p,  $J = 5.9$  Hz, 2H) ppm;  $^{13}\text{C}\{^1\text{H}\}$  NMR (101 MHz,  $\text{CDCl}_3$ )  $\delta$  160.1, 158.6, 158.0, 157.2, 147.5, 147.1, 130.5, 130.3, 127.3, 123.2, 118.6, 118.1, 115.2, 99.6, 99.2, 55.7, 55.7, 30.1, 29.9, 23.1, 22.4 ppm; GC-MS for  $\text{C}_{21}\text{H}_{21}\text{NO}_3$ ,  $m/z = 335$  ( $\text{M}^+$ ); HRMS (ESI-TOF) Calcd for  $\text{C}_{21}\text{H}_{22}\text{NO}_3$  ( $[\text{M} + \text{H}]^+$ ) 336.1594, Found 336.1597.

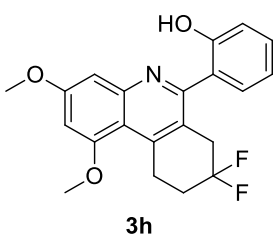

**2-(8,8-Difluoro-1,3-dimethoxy-7,8,9,10-tetrahydrophenanthridin-6-yl)phenol (3h).** A 1,2-dichloroethane (1.5 mL) solution of complex **1** (11 mg, 5 mol %), 3,5-dimethoxyaniline (46 mg, 0.3 mmol), salicylaldehyde (37 mg, 0.3 mmol) and 4-(4,4-difluorocyclohex-1-en-1-yl)morpholine (61 mg, 0.3 mmol) was stirred at 125 °C for 20 h. The product **3h** was isolated using column chromatography on silica gel

(hexanes/EtOAc = 100:1 to 95:5). Yield: 67 mg (60%). Data for **3h**:  $^1\text{H}$  NMR (400 MHz,  $\text{CDCl}_3$ )  $\delta$  7.32 (d,  $J = 7.6$  Hz, 1H), 7.23 (d,  $J = 7.6$  Hz, 1H), 6.99-6.90 (m, 3H), 6.52 (s, 1H), 3.92 (s, 6H), 3.72 (t,  $J = 6.6$  Hz, 2H), 3.35 (t,  $J = 14.6$  Hz, 2H), 2.30-2.17 (m, 2H) ppm;  $^{13}\text{C}\{^1\text{H}\}$  NMR (101 MHz,  $\text{CDCl}_3$ )  $\delta$  160.8, 158.2, 157.9, 155.9, 147.4, 144.5, 141.6, 131.0, 129.9, 122.4, 119.6, 118.7, 114.2, 99.6, 99.2, 55.8, 55.8, 36.6 (t,  $J_{\text{CF}} = 27.3$  Hz), 30.3 (t,  $J_{\text{CF}} = 23.8$  Hz), 27.9 (t,  $J_{\text{CF}} = 5.0$  Hz) ppm;  $^{19}\text{F}$  NMR (376 MHz,  $\text{CDCl}_3$ )  $\delta$  -97.24 ppm; GC-MS for  $\text{C}_{21}\text{H}_{19}\text{F}_2\text{NO}_3$ ,  $m/z = 371$  ( $\text{M}^+$ ); HRMS (ESI-TOF) Calcd for  $\text{C}_{21}\text{H}_{20}\text{F}_2\text{NO}_3$  ( $[\text{M} + \text{H}]^+$ ) 372.1406, Found 372.1407.

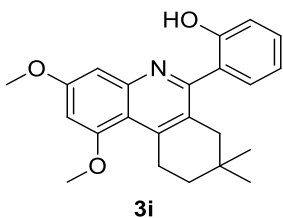

**2-(8,8-Dimethyl-1,3-dimethoxy-7,8,9,10-tetrahydrophenanthridin-6-yl)phenol (3i).**

A 1,2-dichloroethane (1.5 mL) solution of complex **1** (11 mg, 5 mol %), 3,5-dimethoxyaniline (46 mg, 0.3 mmol), salicylaldehyde (37 mg, 0.3 mmol) and 4-(4,4-dimethylcyclohex-1-en-1-yl)morpholine (58 mg, 0.3 mmol) was stirred at 125 °C for 20 h. The product **3i** was isolated using column chromatography on silica gel (hexanes/EtOAc = 100:1 to 95:5). Yield: 59 mg (54%). Data for **3i**:  $^1\text{H}$  NMR (400 MHz,  $\text{CDCl}_3$ )  $\delta$  7.52 (d,  $J = 7.6$  Hz, 1H), 7.29 (d,  $J = 7.7$  Hz, 1H), 7.09 (d,  $J = 8.0$  Hz, 1H), 6.99 (s, 1H), 6.93 (t,  $J = 7.4$  Hz, 1H), 6.52 (s, 1H), 3.92 (s, 6H), 3.56 (t,  $J = 6.4$  Hz, 2H), 2.73 (s, 2H), 1.65 (t,  $J = 6.4$  Hz, 2H), 0.90 (s, 6H) ppm;  $^{13}\text{C}\{^1\text{H}\}$  NMR (101 MHz,  $\text{CDCl}_3$ )  $\delta$  160.4, 158.7, 157.9, 157.3, 147.4, 146.6, 130.6, 130.4, 126.1, 122.5, 118.6, 118.0, 115.0, 99.4, 99.1, 55.8, 55.8, 42.9, 35.5, 28.6, 28.1, 27.6 ppm; GC-MS for  $\text{C}_{23}\text{H}_{25}\text{NO}_3$ ,  $m/z = 363$  ( $\text{M}^+$ ); HRMS (ESI-TOF) Calcd for  $\text{C}_{23}\text{H}_{26}\text{NO}_3$  ( $[\text{M} + \text{H}]^+$ ) 364.1907, Found 364.1905.

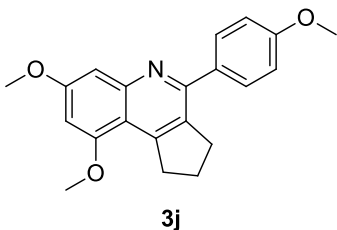

**7,9-Dimethoxy-4-(4-methoxyphenyl)-2,3-dihydro-1H-cyclopentaquinoline (3j).**

A 1,2-dichloroethane (1.5 mL) solution of complex **1** (11 mg, 5 mol %), 3,5-dimethoxyaniline (46 mg, 0.3 mmol), 4-methoxybenzaldehyde (41 mg, 0.3 mmol) and 4-(cyclopent-1-en-1-yl)morpholine (46 mg, 0.3 mmol) was stirred at 125 °C for 20 h. The product **3j** was isolated using column chromatography on silica gel (hexanes/EtOAc = 100:1 to 95:5). Yield: 51 mg (52%). Data for **3j**:  $^1\text{H}$  NMR (400 MHz,  $\text{CDCl}_3$ )  $\delta$  7.78 (d, 2H), 7.10 (s, 1H), 7.01 (d,  $J = 8.5$  Hz, 2H), 6.45 (d,  $J = 1.7$  Hz, 1H), 3.92 (d,  $J = 5.4$  Hz, 6H), 3.87 (s, 3H), 3.54 (t,  $J = 7.5$  Hz, 2H), 3.10 (t,  $J = 7.5$  Hz, 2H), 2.12 (p,  $J = 7.6$  Hz, 2H) ppm;  $^{13}\text{C}\{^1\text{H}\}$  NMR (101 MHz,  $\text{CDCl}_3$ )  $\delta$  160.4, 160.0, 157.4, 155.7, 151.3, 150.1, 133.2, 132.8, 130.2, 114.1, 113.8, 100.3, 98.0, 55.7, 55.6, 55.5, 35.4, 32.7, 25.4 ppm; GC-MS for  $\text{C}_{21}\text{H}_{21}\text{NO}_3$ ,  $m/z = 335$  ( $\text{M}^+$ ); HRMS (ESI-TOF) Calcd for  $\text{C}_{21}\text{H}_{22}\text{NO}_3$  ( $[\text{M} + \text{H}]^+$ ) 336.1594, Found 336.1593.

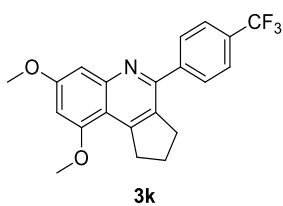

**7,9-Dimethoxy-4-(4-(trifluoromethyl)phenyl)-2,3-dihydro-1H-cyclopentaquinoline (3k).**

A 1,2-dichloroethane (1.5 mL) solution of complex **1** (11 mg, 5 mol %), 3,5-dimethoxyaniline (46 mg, 0.3 mmol), 4-(trifluoromethyl)benzaldehyde (52 mg, 0.3 mmol) and 4-(cyclopent-1-en-1-yl)morpholine (46 mg, 0.3 mmol) was stirred at 125 °C for 20 h. The product **3k** was isolated using column chromatography on silica gel

(hexanes/EtOAc = 100:1 to 95:5). Yield: 53 mg (48%). Data for **3k**:  $^1\text{H}$  NMR (400 MHz,  $\text{CDCl}_3$ )  $\delta$  7.91 (d,  $J$  = 7.9 Hz, 2H), 7.74 (d,  $J$  = 7.6 Hz, 2H), 7.12 (s, 1H), 6.49 (s, 1H), 3.92 (d,  $J$  = 7.5 Hz, 6H), 3.56 (t,  $J$  = 7.4 Hz, 2H), 3.06 (t,  $J$  = 7.4 Hz, 2H), 2.13 (p,  $J$  = 7.2 Hz, 2H) ppm;  $^{13}\text{C}\{^1\text{H}\}$  NMR (101 MHz,  $\text{CDCl}_3$ )  $\delta$  161.9, 160.6, 157.3, 154.5, 151.9, 150.2, 132.8, 129.1, 125.3 (dd,  $J_{\text{CF}}$  = 7.5, 3.6 Hz), 114.6, 100.2, 98.6, 92.1, 90.4, 55.6, 55.6, 35.4, 32.3, 25.3 ppm; GC-MS for  $\text{C}_{21}\text{H}_{18}\text{F}_3\text{NO}_2$ ,  $m/z$  = 373 ( $\text{M}^+$ );  $^{19}\text{F}$  NMR (376 MHz,  $\text{CDCl}_3$ )  $\delta$  -62.67 ppm; HRMS (ESI-TOF) Calcd for  $\text{C}_{21}\text{H}_{19}\text{F}_3\text{NO}_2$  ( $[\text{M} + \text{H}]^+$ ) 374.1383, Found 374.1376.

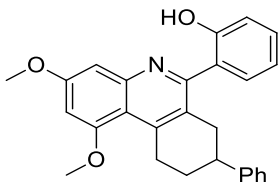

**3I**

**2-(1,3-Dimethoxy-8-phenyl-7,8,9,10-tetrahydrophenanthridin-6-yl)phenol (3I).** A 1,2-dichloroethane (1.5 mL) solution of complex **1** (11 mg, 5 mol %), 3,5-dimethoxyaniline (46 mg, 0.3 mmol), salicylaldehyde (37 mg, 0.3 mmol) and 4-(1,2,3,6-tetrahydro-[1,1'-biphenyl]-4-yl)morpholine (73 mg, 0.3 mmol) was stirred at 125 °C for 20 h. The product **3I** was isolated using column chromatography on silica gel

(hexanes/EtOAc = 100:1 to 95:5). Yield: 54.3 mg (44%). Data for **3I**:  $^1\text{H}$  NMR (400 MHz,  $\text{CDCl}_3$ )  $\delta$  7.49 (d,  $J$  = 7.5 Hz, 1H), 7.33 (t,  $J$  = 7.5 Hz, 2H), 7.27-7.20 (m, 4H), 7.08-6.99 (m, 2H), 6.86 (t,  $J$  = 7.5 Hz, 1H), 6.53 (d,  $J$  = 2.3 Hz, 1H), 3.98-3.89 (m, 6H), 3.59-3.48 (m, 1H), 3.13 (q,  $J$  = 8.2, 4.9 Hz, 2H), 2.78-2.70 (m, 1H), 2.26 (d,  $J$  = 11.7 Hz, 1H), 2.02 (m, 1H) ppm;  $^{13}\text{C}\{^1\text{H}\}$  NMR (101 MHz,  $\text{CDCl}_3$ )  $\delta$  160.5, 158.7, 157.7, 157.1, 147.5, 146.8, 146.0, 130.7, 130.2, 128.7, 127.0, 126.9, 126.5, 122.5, 118.9, 118.1, 115.1, 99.5, 99.2, 55.8, 39.8, 37.9, 31.1, 30.1 ppm; GC-MS for  $\text{C}_{27}\text{H}_{25}\text{NO}_3$ ,  $m/z$  = 411 ( $\text{M}^+$ ); HRMS (ESI-TOF) Calcd for  $\text{C}_{27}\text{H}_{26}\text{NO}_3$  ( $[\text{M} + \text{H}]^+$ ) 412.1907, Found 412.1908.



## 9. $^1\text{H}$ NMR of 2a (400 MHz, $\text{CDCl}_3$ )

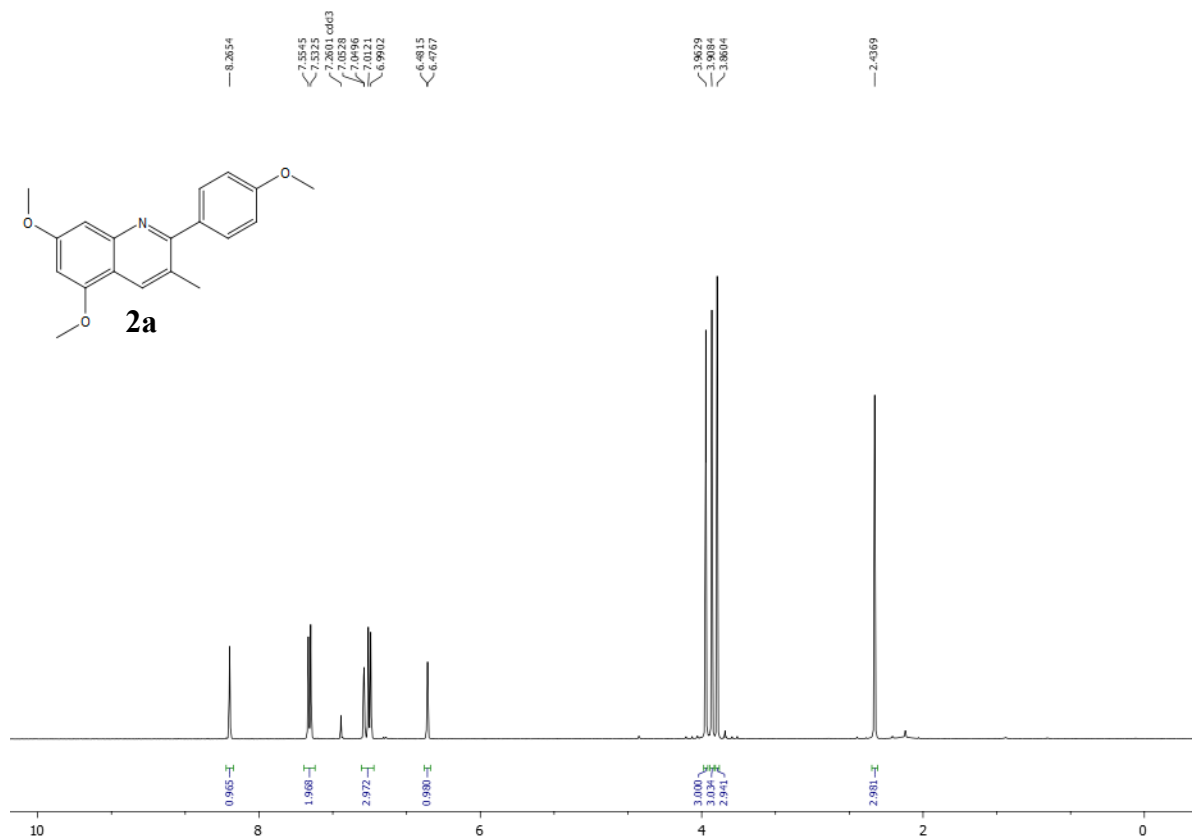

## $^{13}\text{C}\{^1\text{H}\}$ NMR of 2a (101 MHz, $\text{CDCl}_3$ )

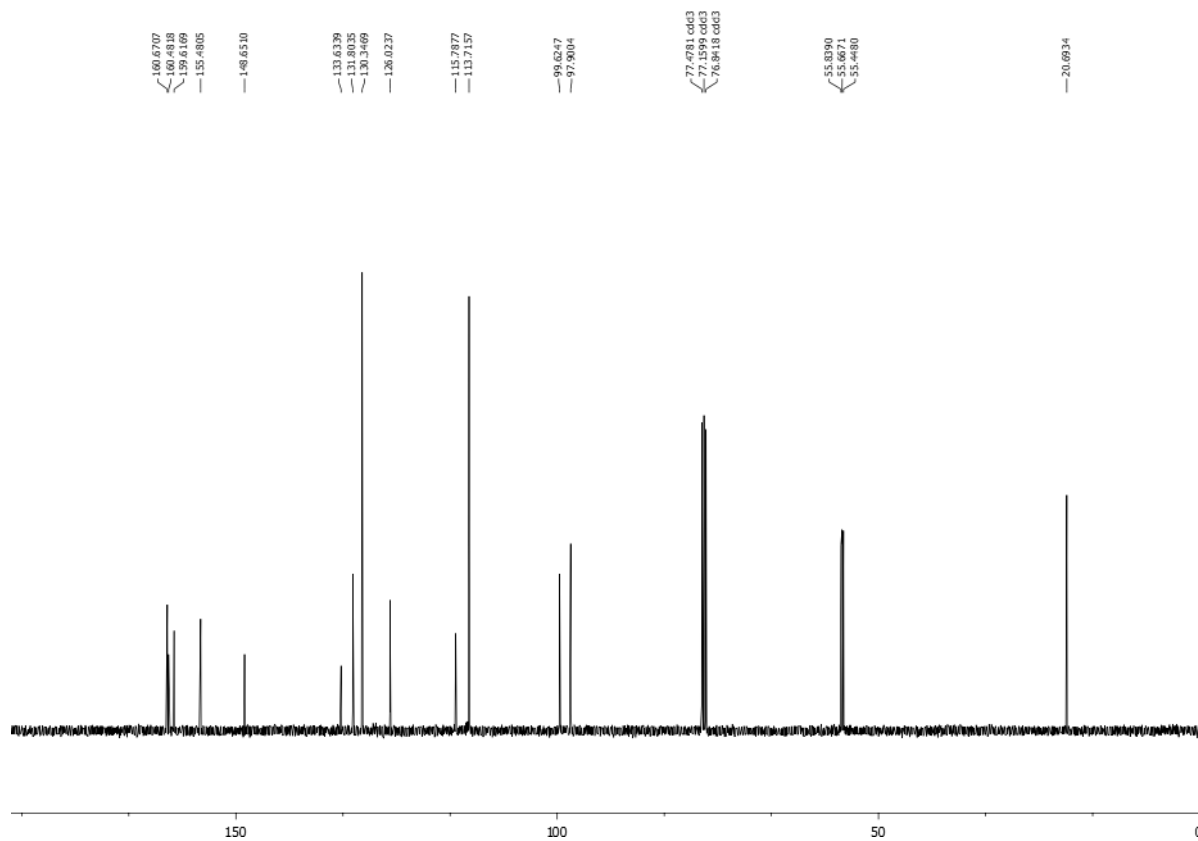

# $^1\text{H}$ NMR of 2b (400 MHz, $\text{CDCl}_3$ )

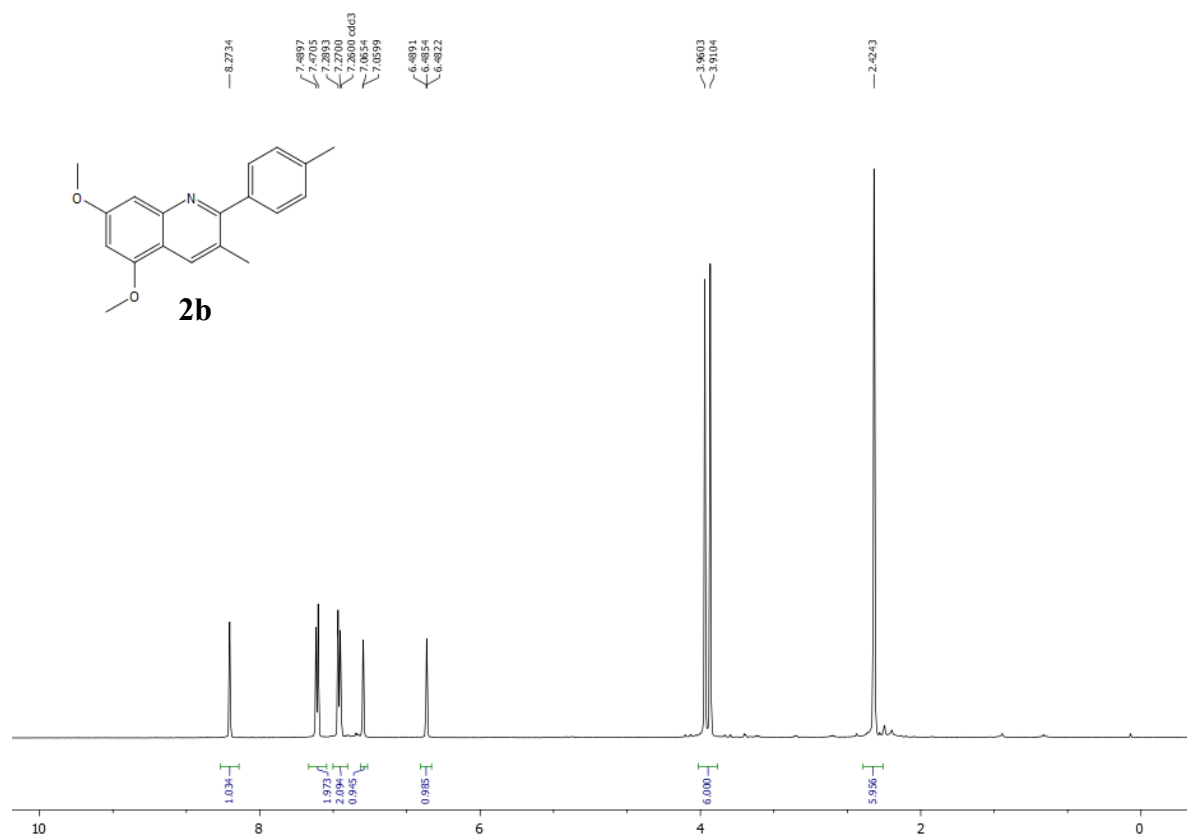

# $^{13}\text{C}\{^1\text{H}\}$ NMR of 2b (101 MHz, $\text{CDCl}_3$ )

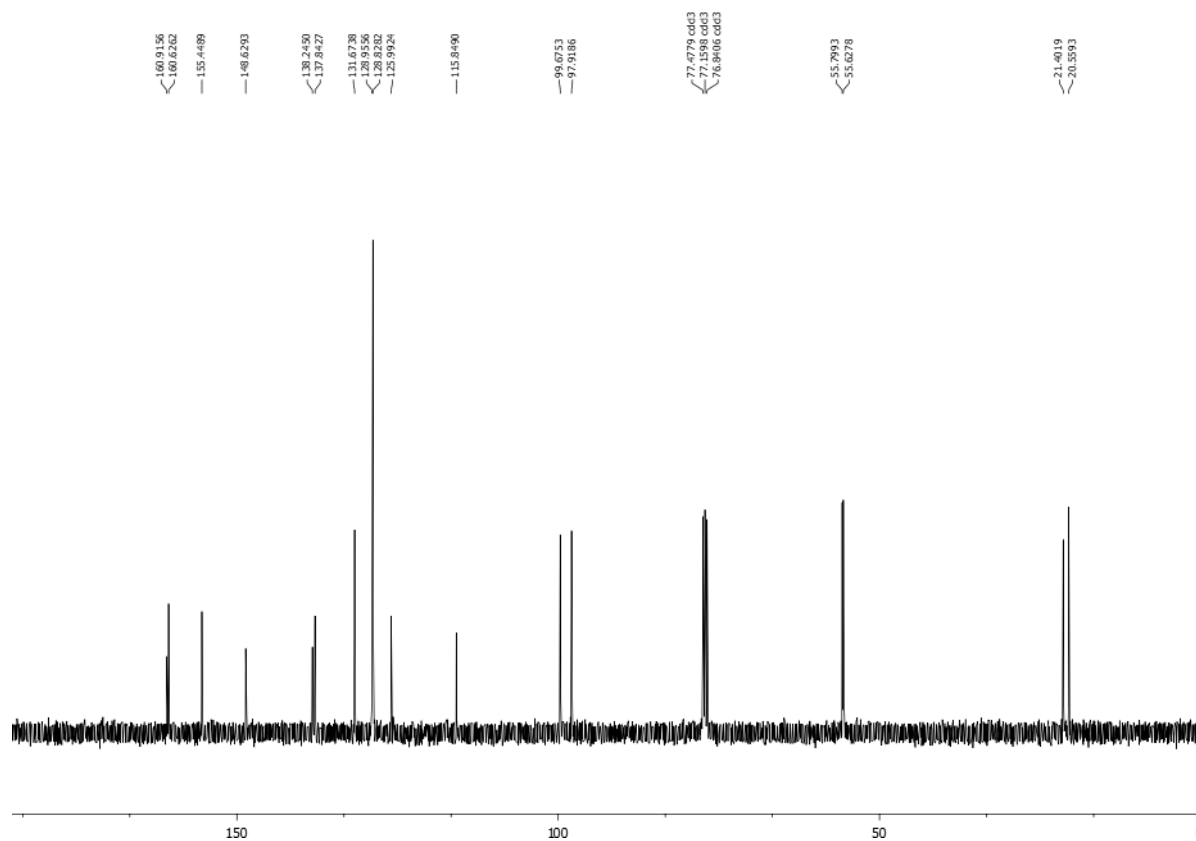

$^1\text{H}$  NMR of **2c** (400 MHz,  $\text{CDCl}_3$ )

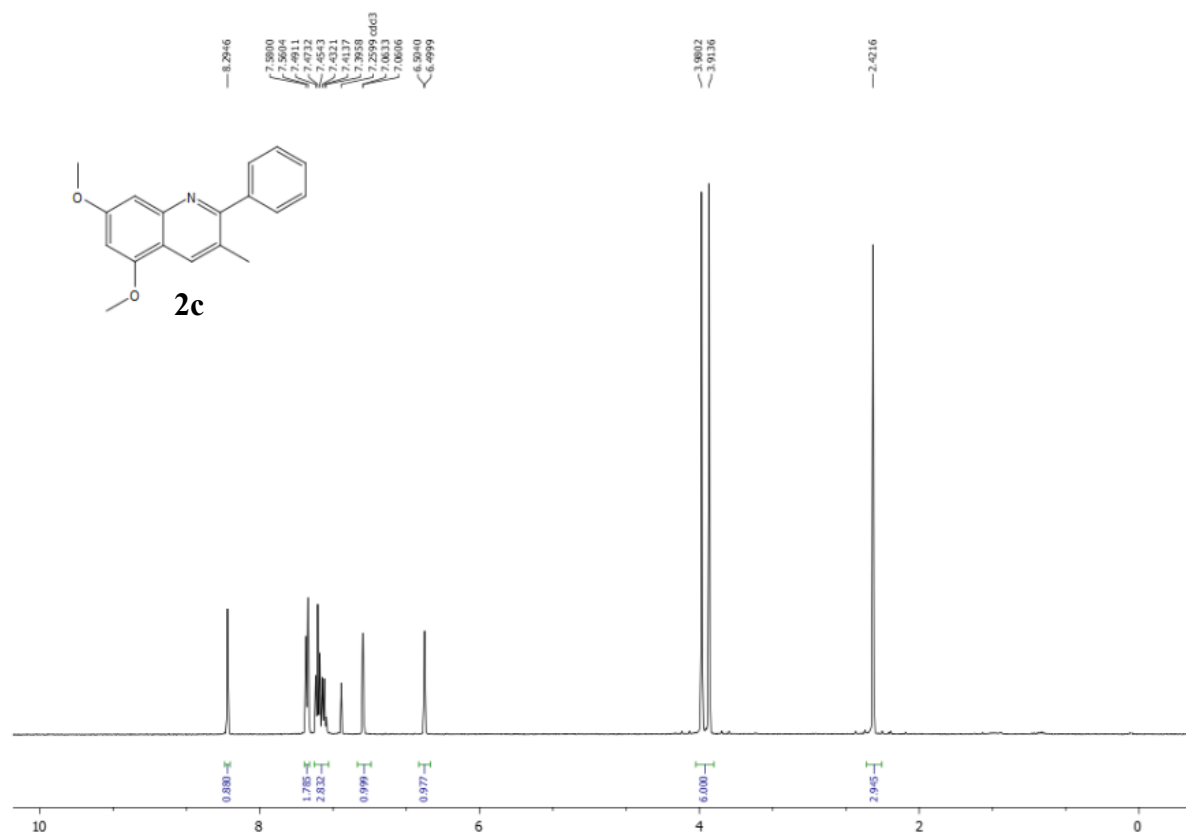

$^{13}\text{C}\{^1\text{H}\}$  NMR of **2c** (101 MHz,  $\text{CDCl}_3$ )

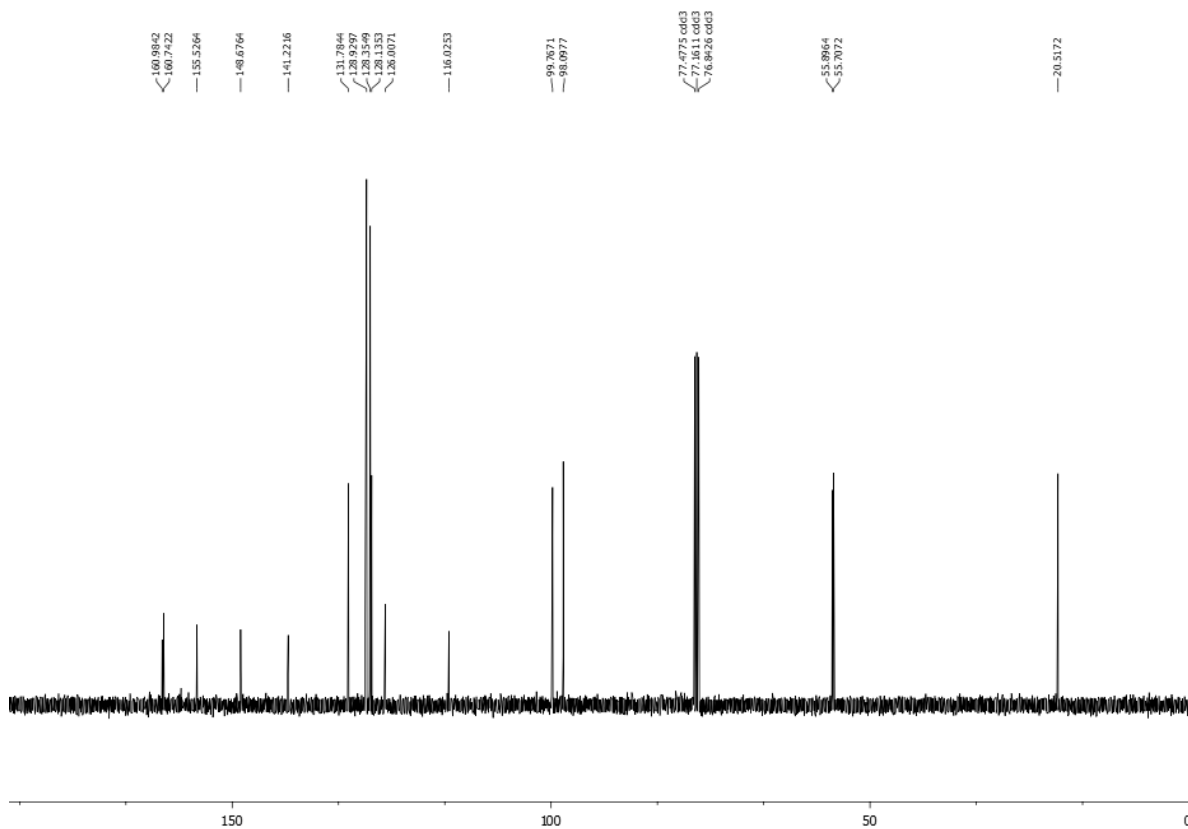

# $^1\text{H}$ NMR of 2d (400 MHz, $\text{CDCl}_3$ )

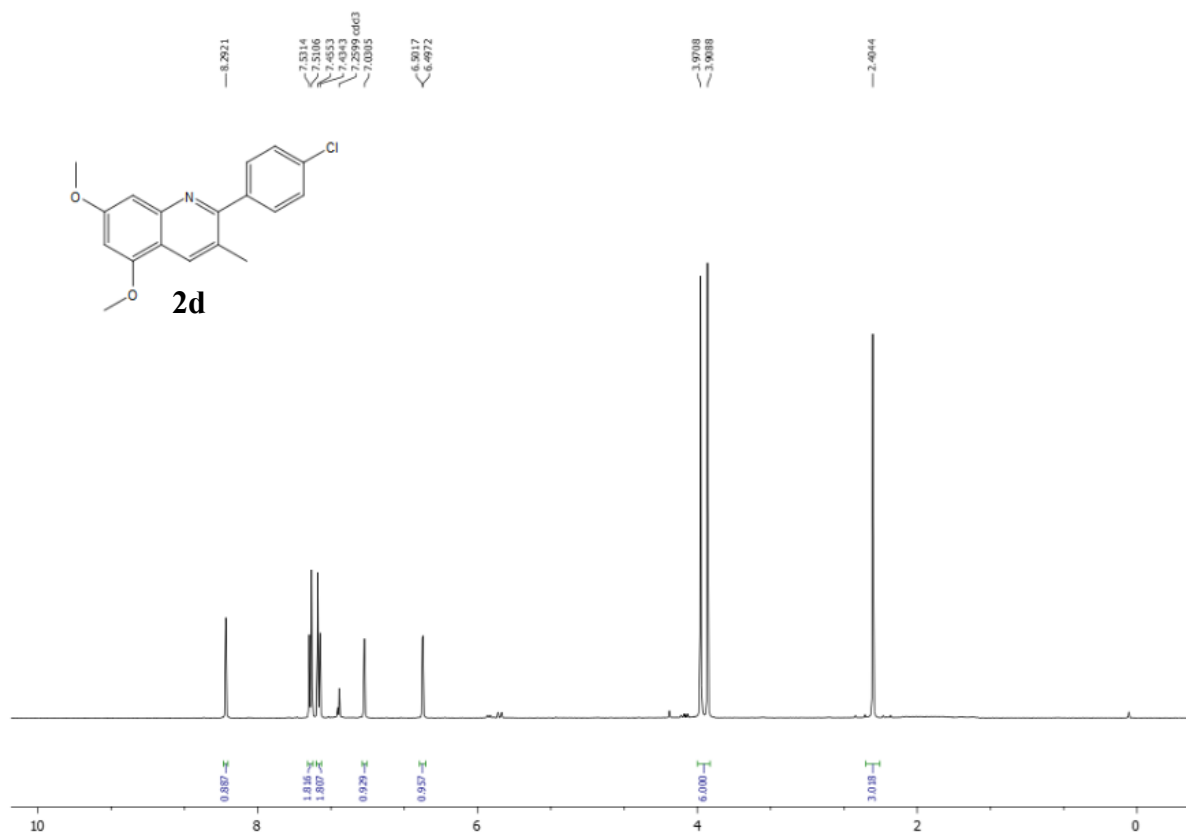

# $^{13}\text{C}\{^1\text{H}\}$ NMR of 2d (101 MHz, $\text{CDCl}_3$ )

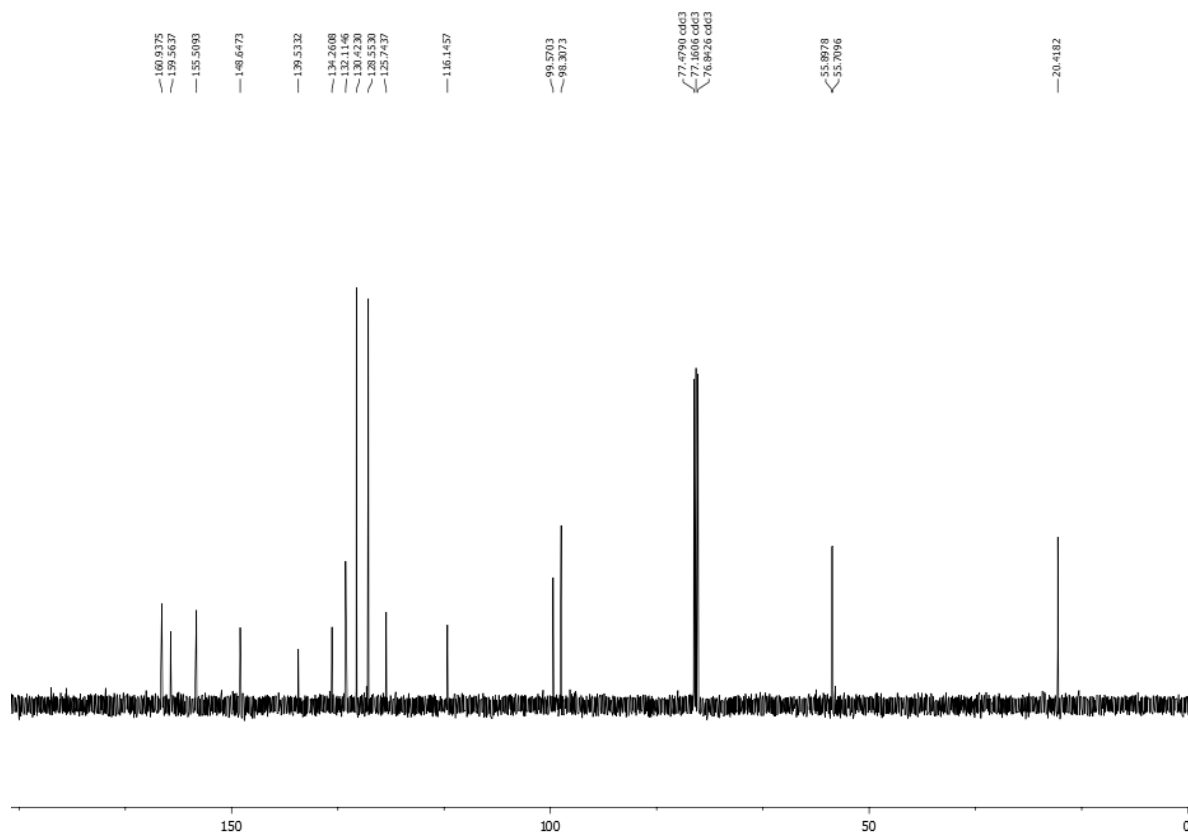

# $^1\text{H}$ NMR of 2e (400 MHz, $\text{CDCl}_3$ )

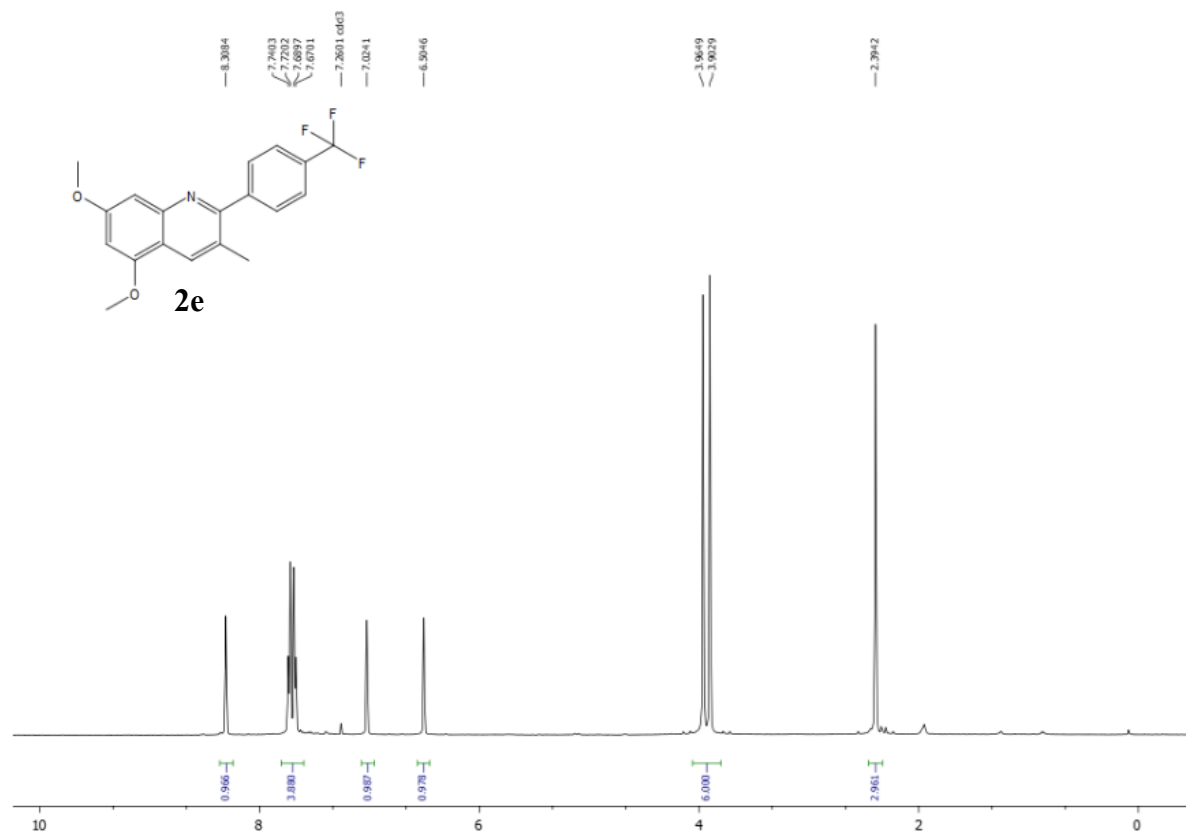

# $^{13}\text{C}\{^1\text{H}\}$ NMR of 2e (101 MHz, $\text{CDCl}_3$ )

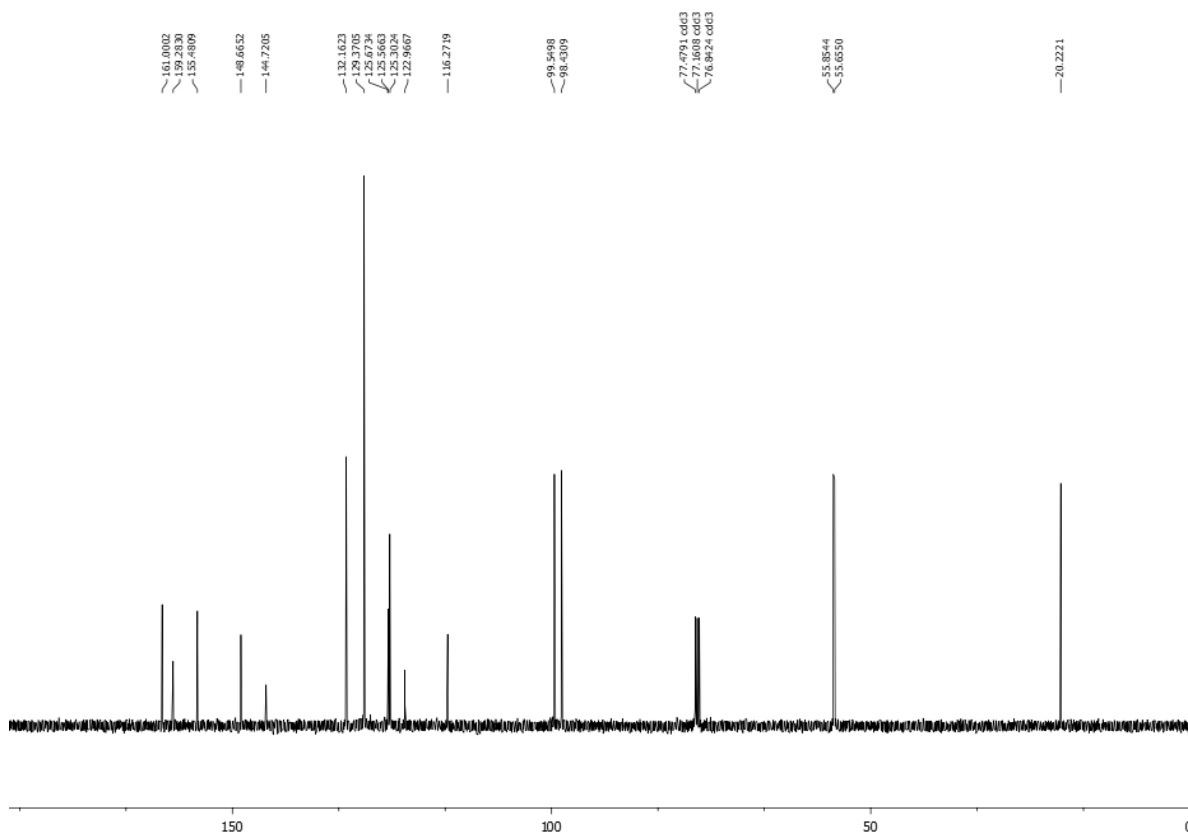

**$^{19}\text{F}$  NMR of 2e (376 MHz,  $\text{CDCl}_3$ )**

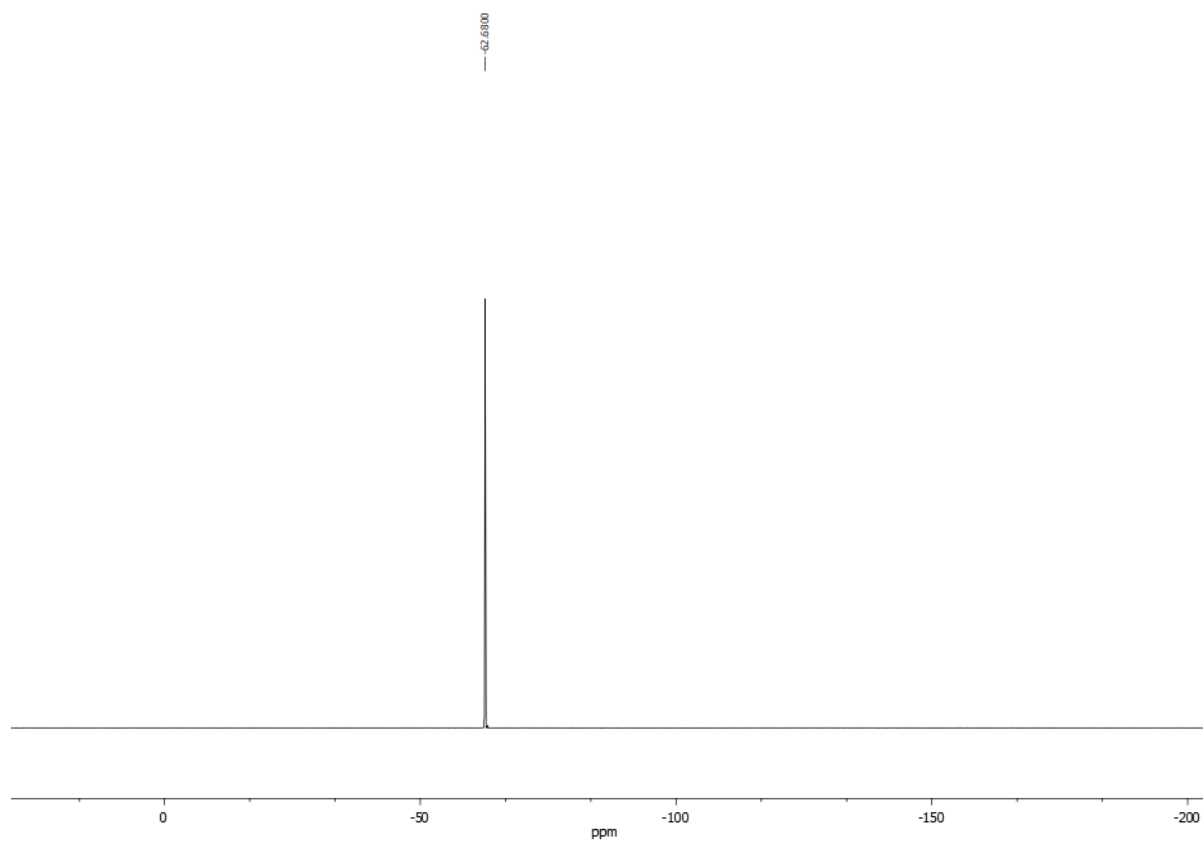

# $^1\text{H}$ NMR of 2f (400 MHz, $\text{CDCl}_3$ )

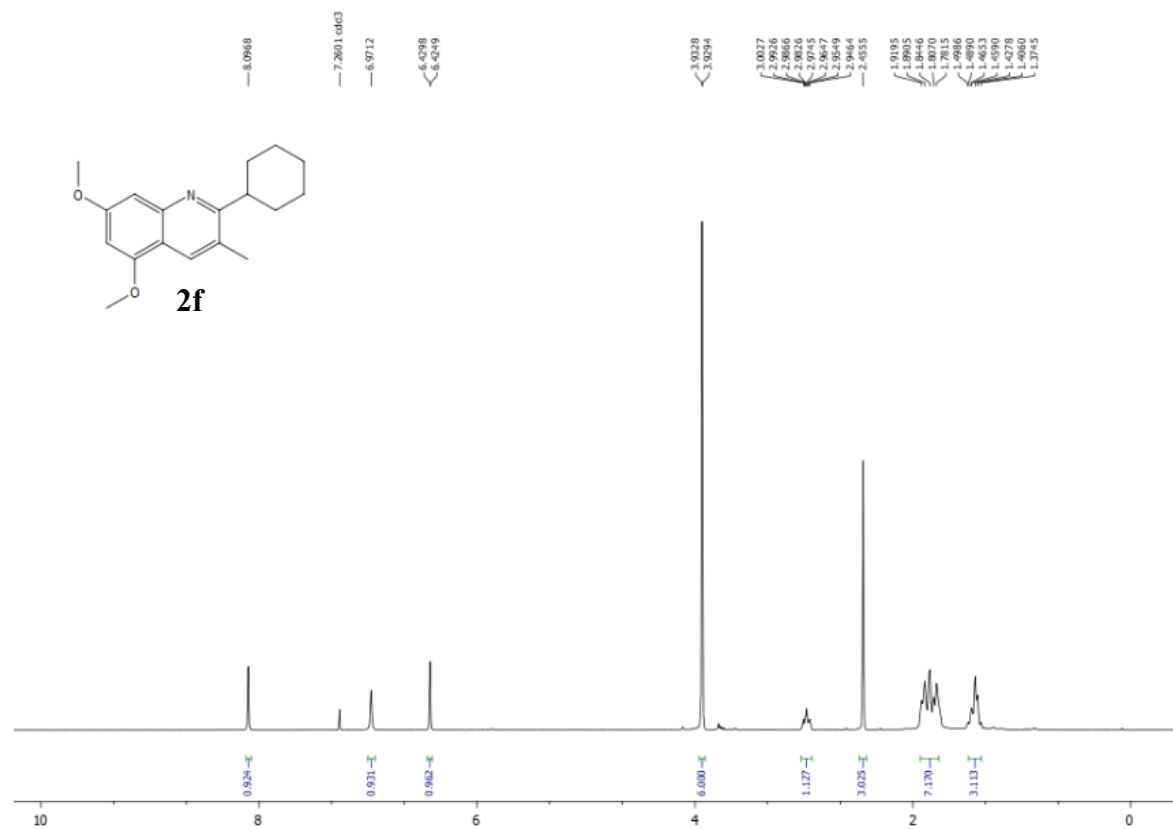

# $^{13}\text{C}\{^1\text{H}\}$ NMR of 2f (101 MHz, $\text{CDCl}_3$ )

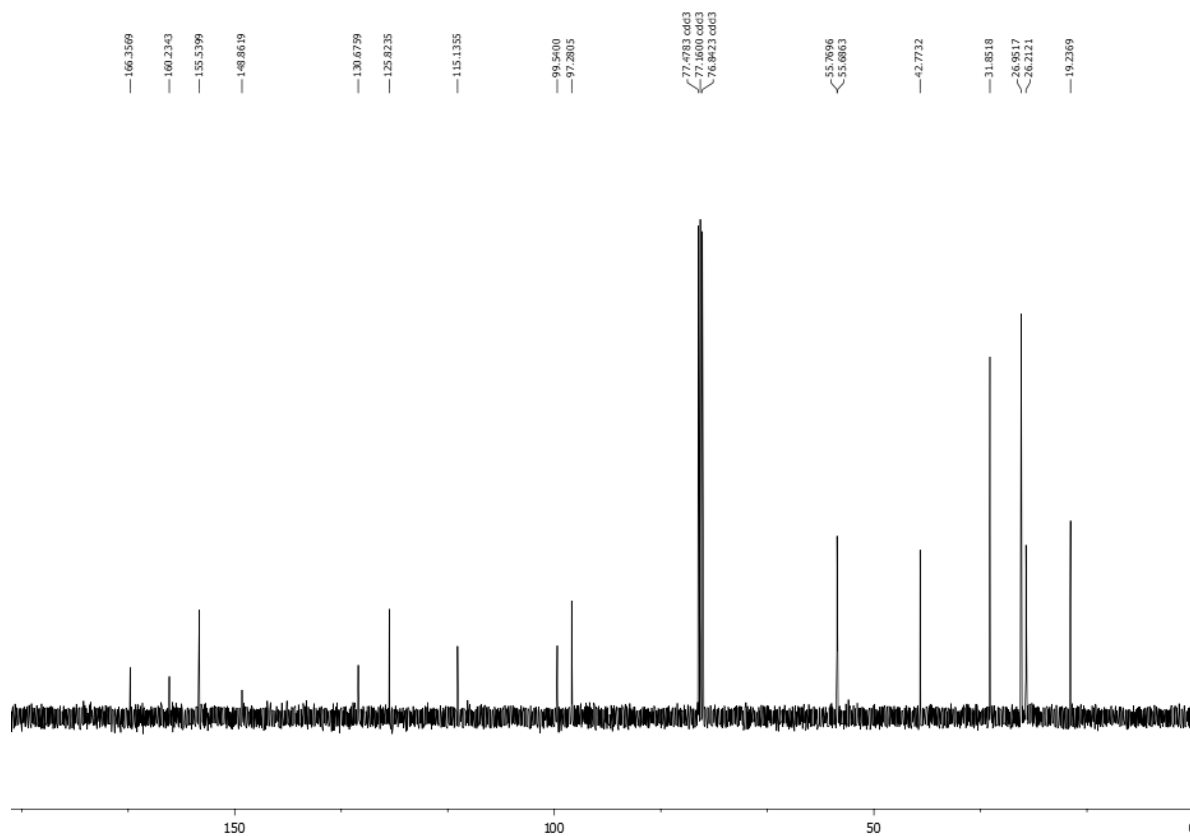

$^1\text{H}$  NMR of 2g (400 MHz,  $\text{CDCl}_3$ )

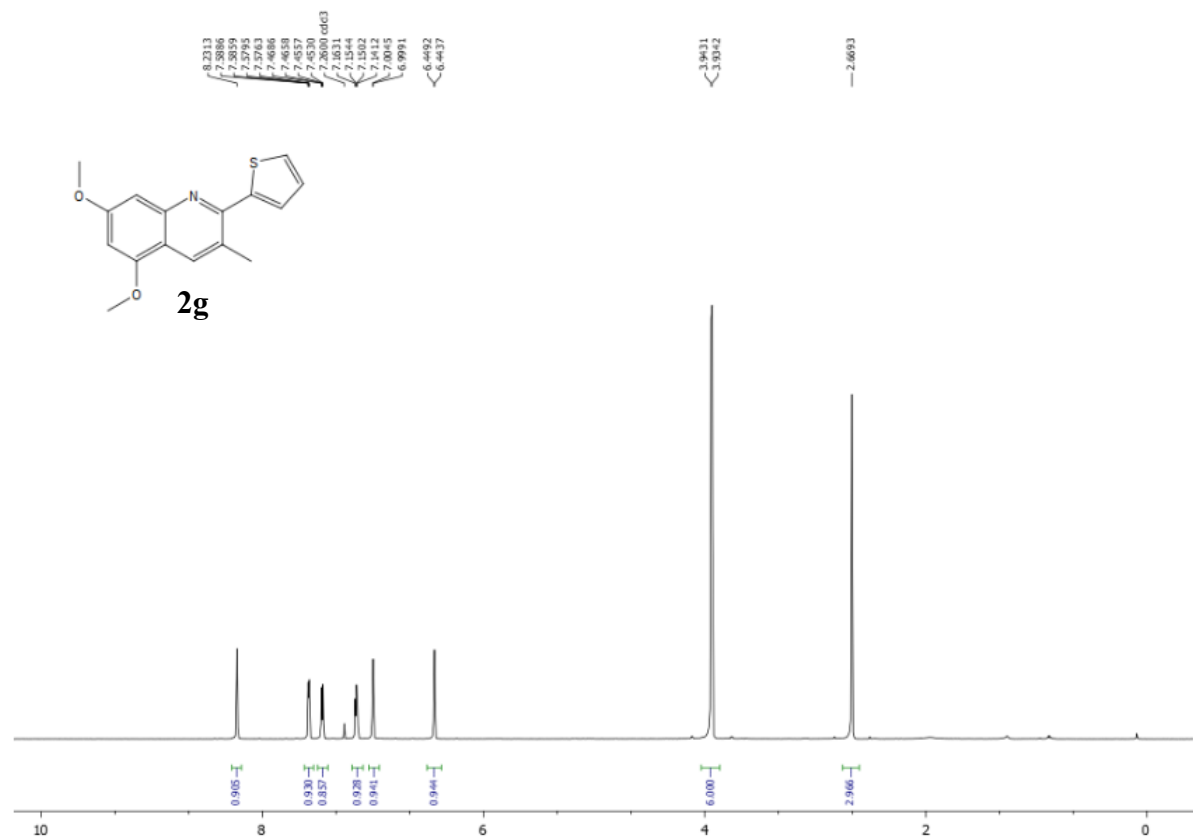

$^{13}\text{C}\{^1\text{H}\}$  NMR of 2g (101 MHz,  $\text{CDCl}_3$ )

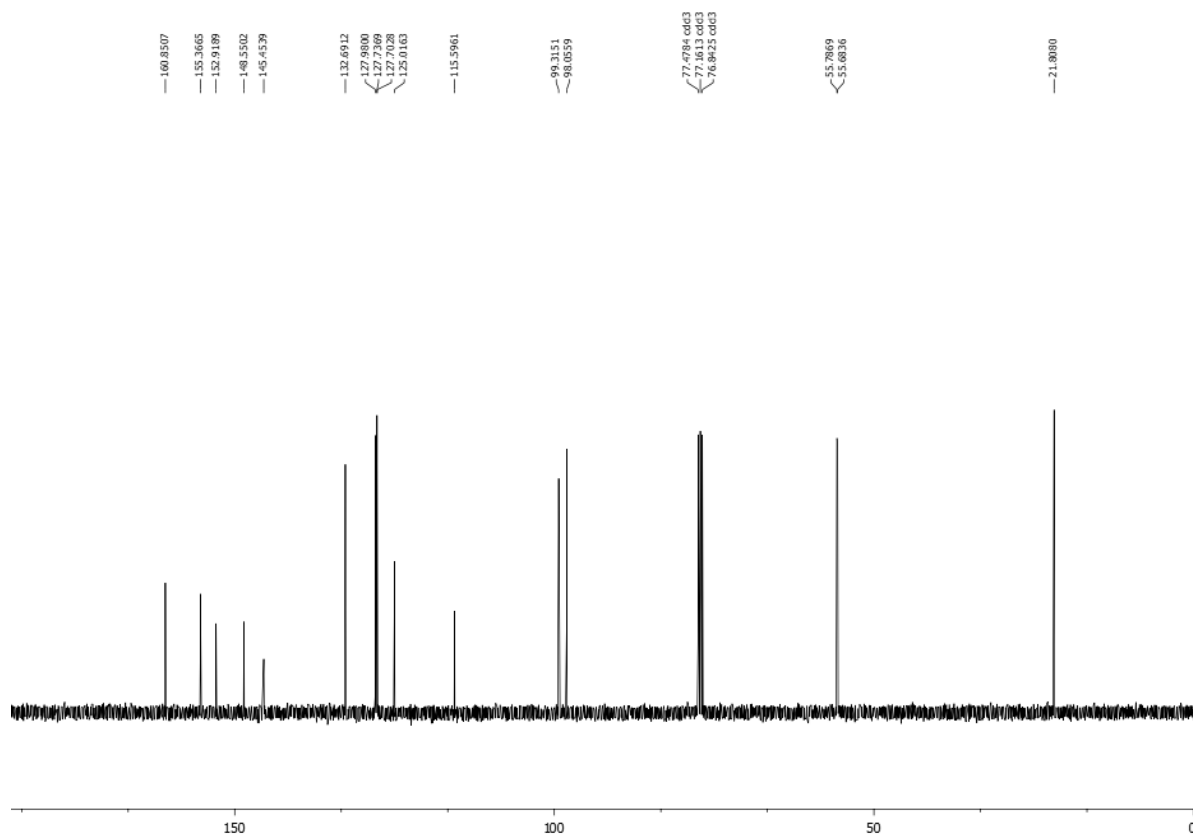



**$^1\text{H}$  NMR of 2h (400 MHz,  $\text{CDCl}_3$ )**

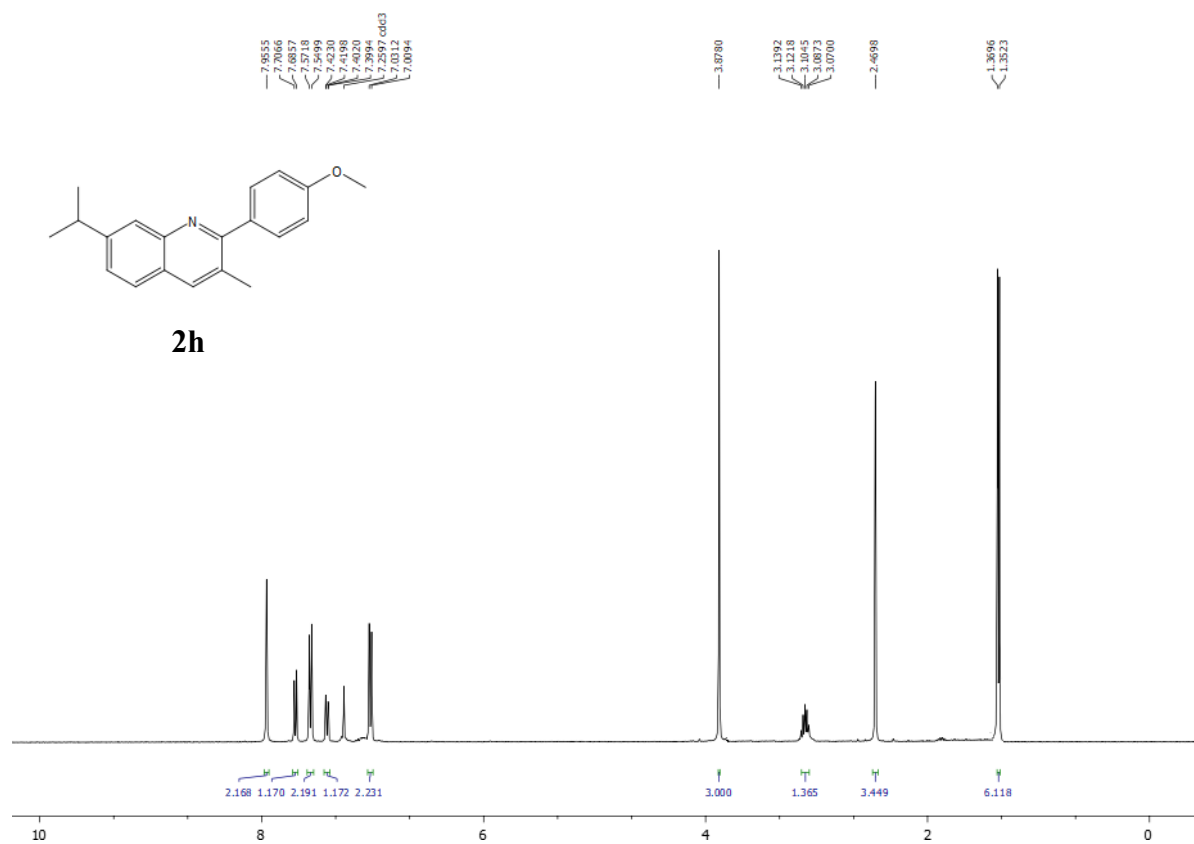

**$^{13}\text{C}\{^1\text{H}\}$  NMR of 2h (101 MHz,  $\text{CDCl}_3$ )**

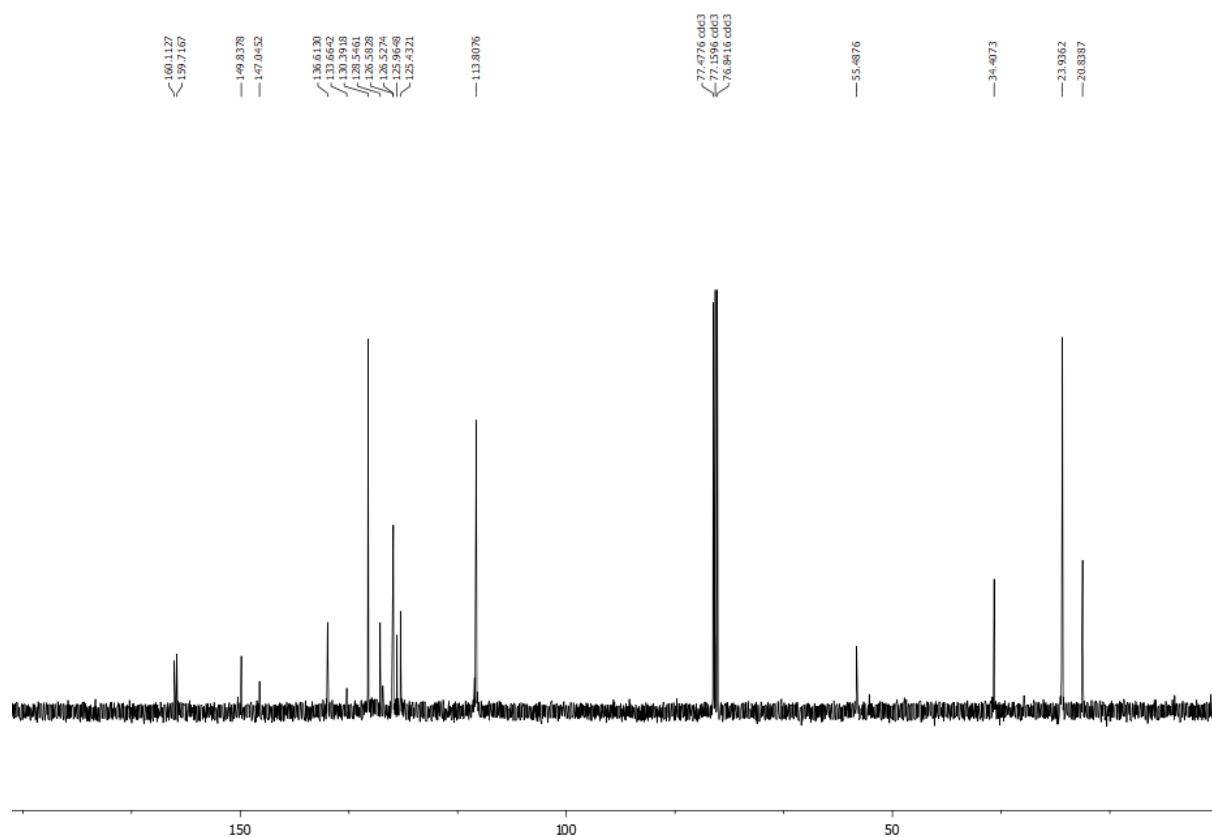

# $^1\text{H}$ NMR of 2i (400 MHz, $\text{CDCl}_3$ )

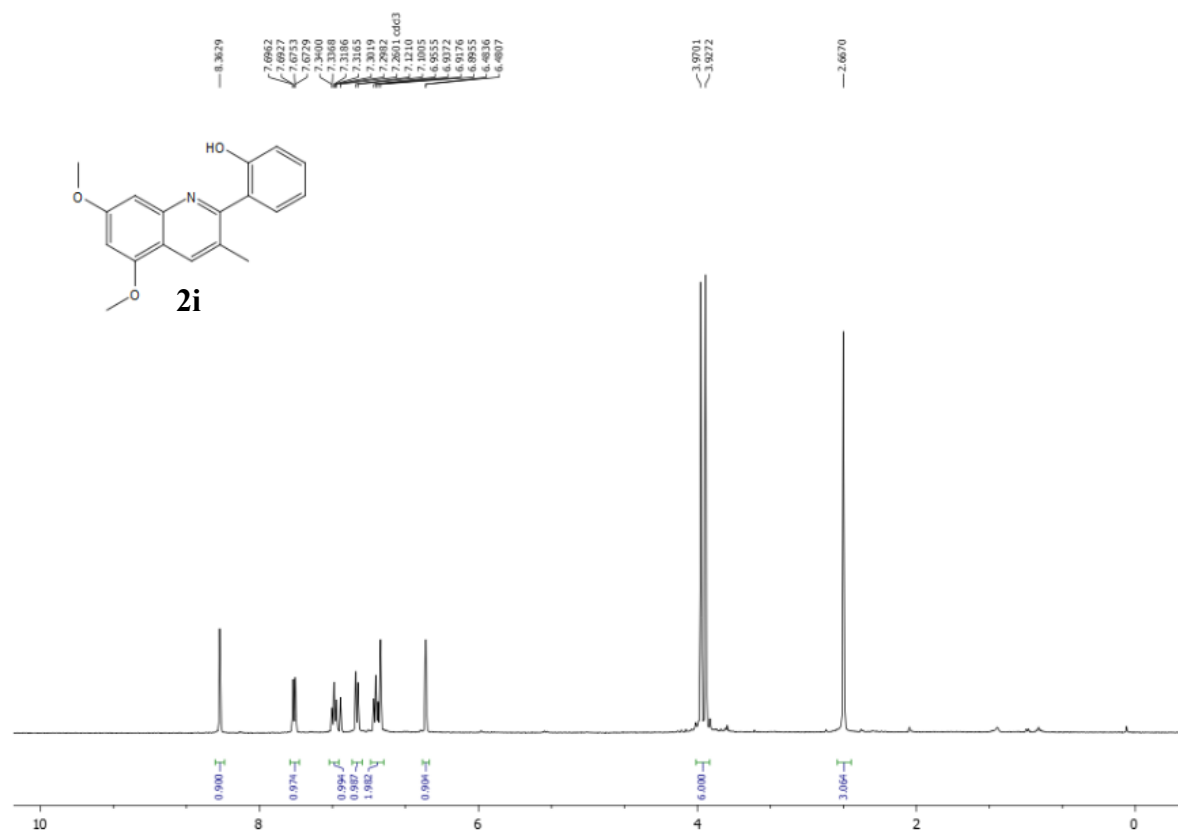

# $^{13}\text{C}\{^1\text{H}\}$ NMR of 2i (101 MHz, $\text{CDCl}_3$ )

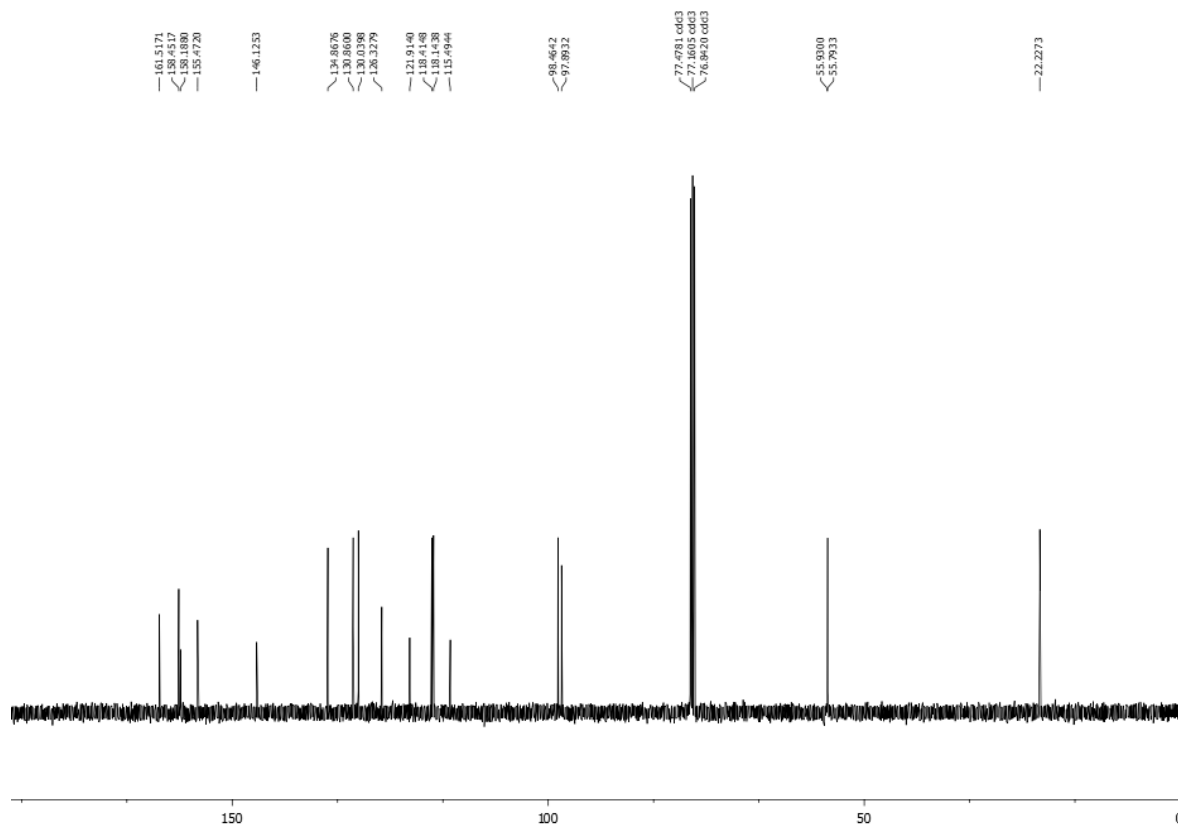

<sup>1</sup>H NMR of 2j (400 MHz, CDCl<sub>3</sub>)

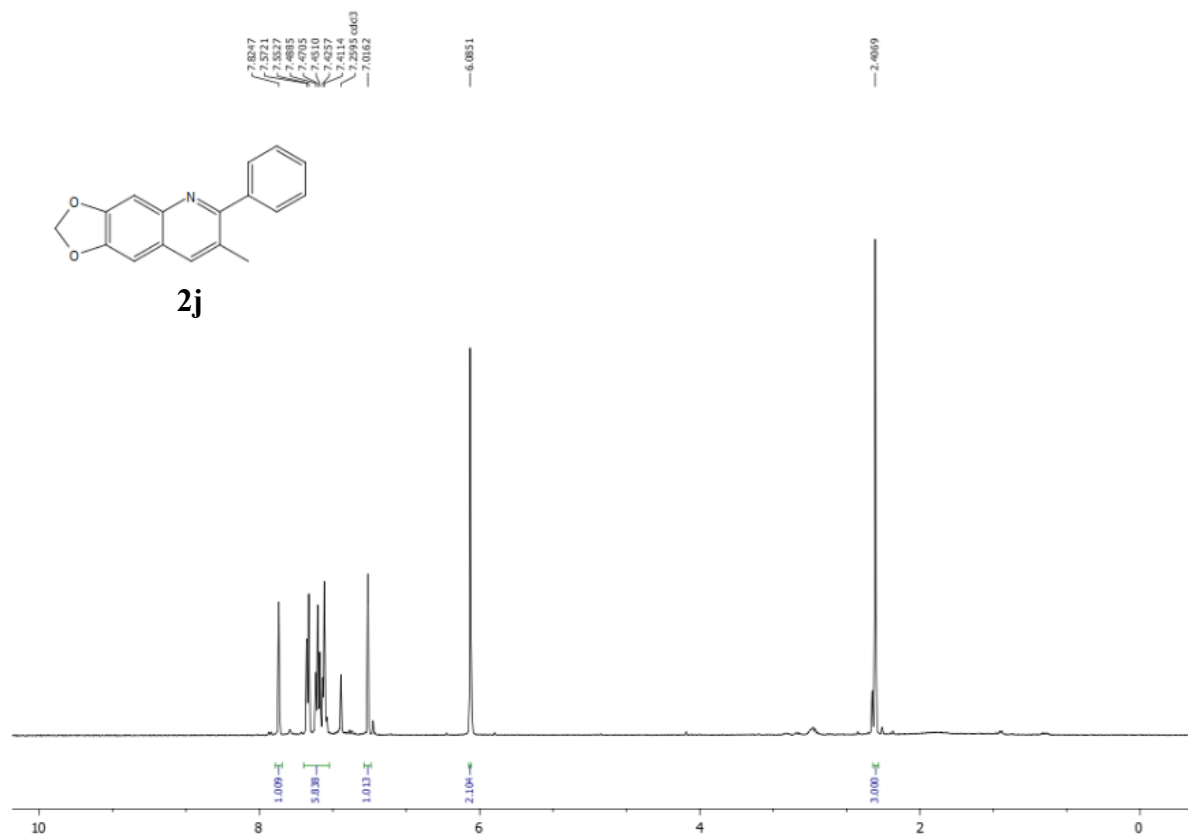

<sup>13</sup>C{<sup>1</sup>H} NMR of 2j (101 MHz, CDCl<sub>3</sub>)

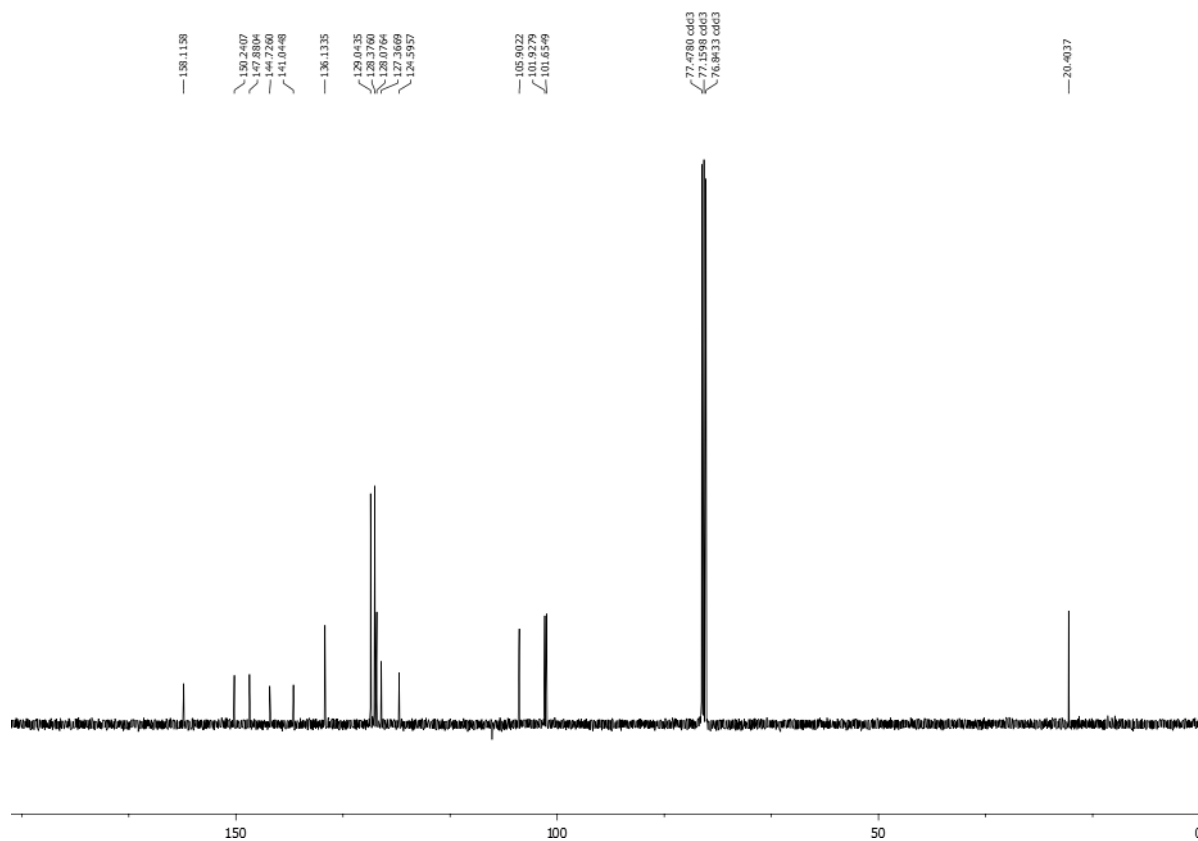

# $^1\text{H}$ NMR of 2k (400 MHz, $\text{CDCl}_3$ )

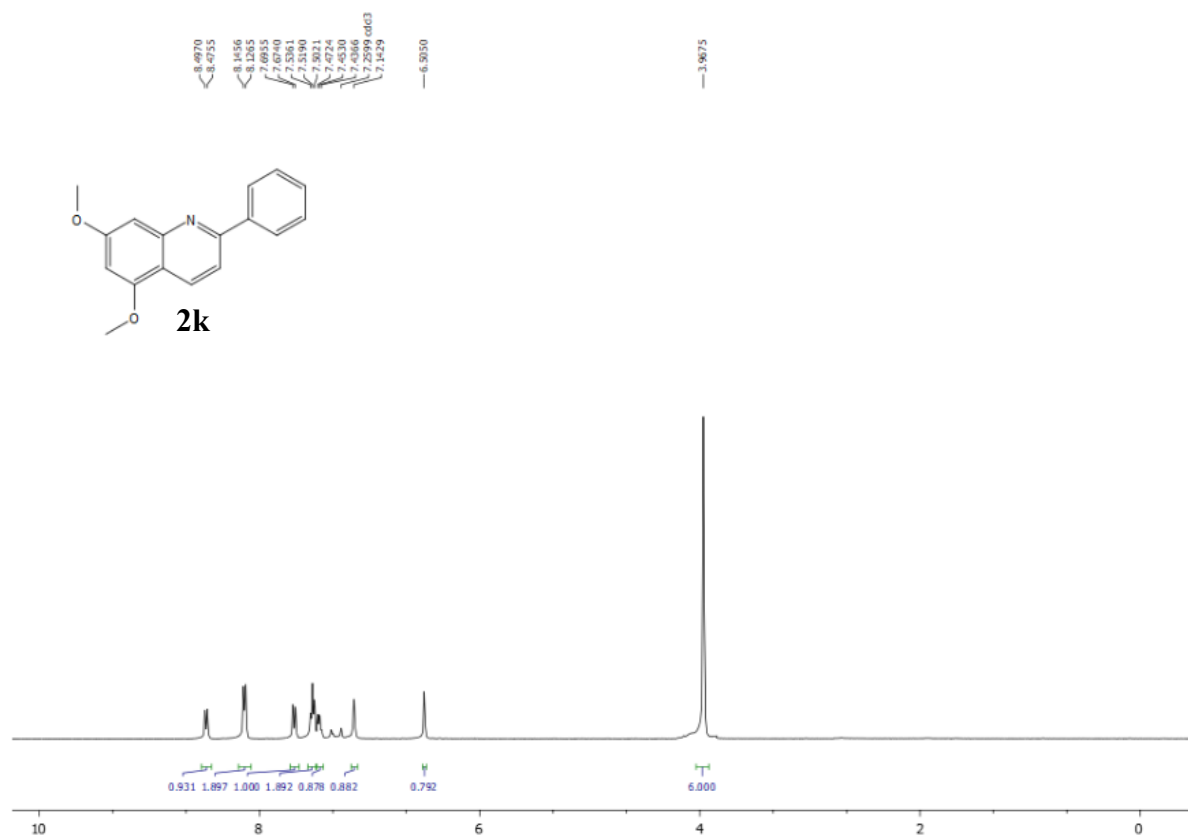

# $^{13}\text{C}\{^1\text{H}\}$ NMR 2k (101 MHz, $\text{CDCl}_3$ )

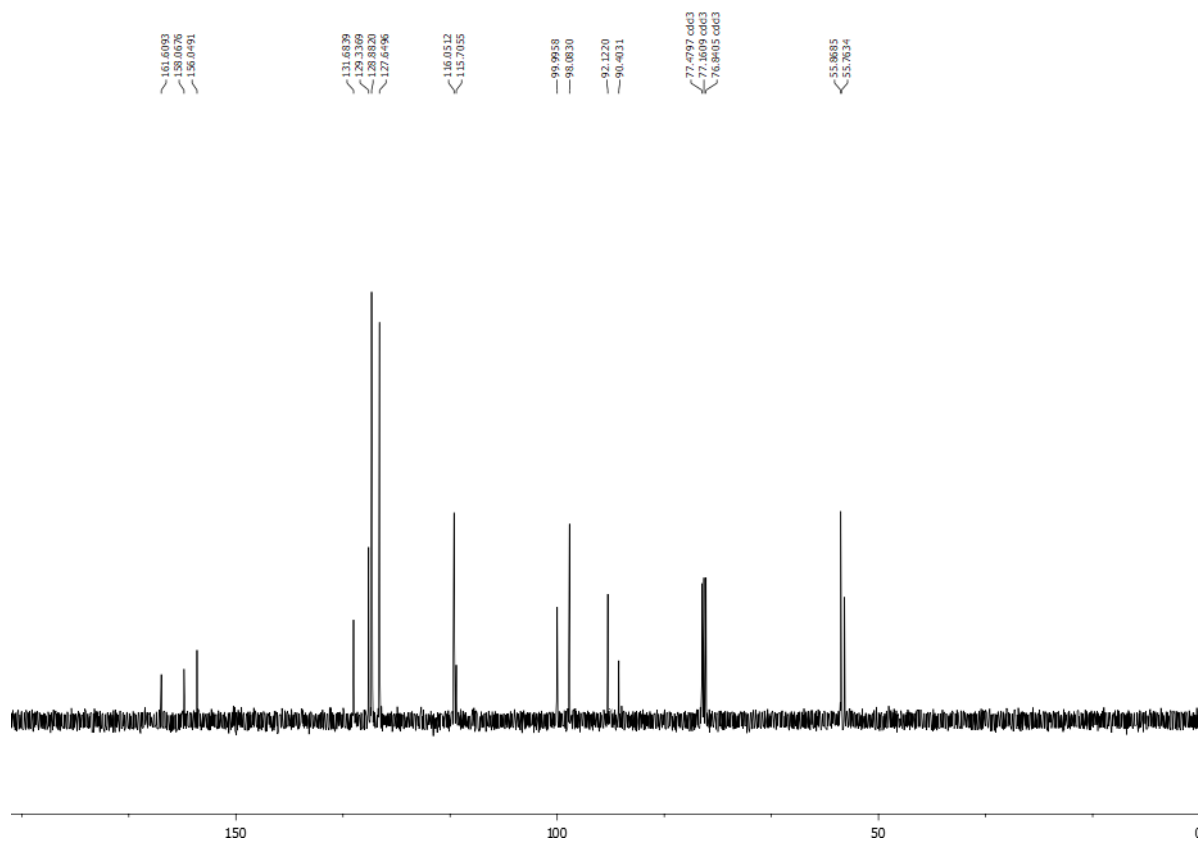

# $^1\text{H}$ NMR of 2l (400 MHz, $\text{CDCl}_3$ )

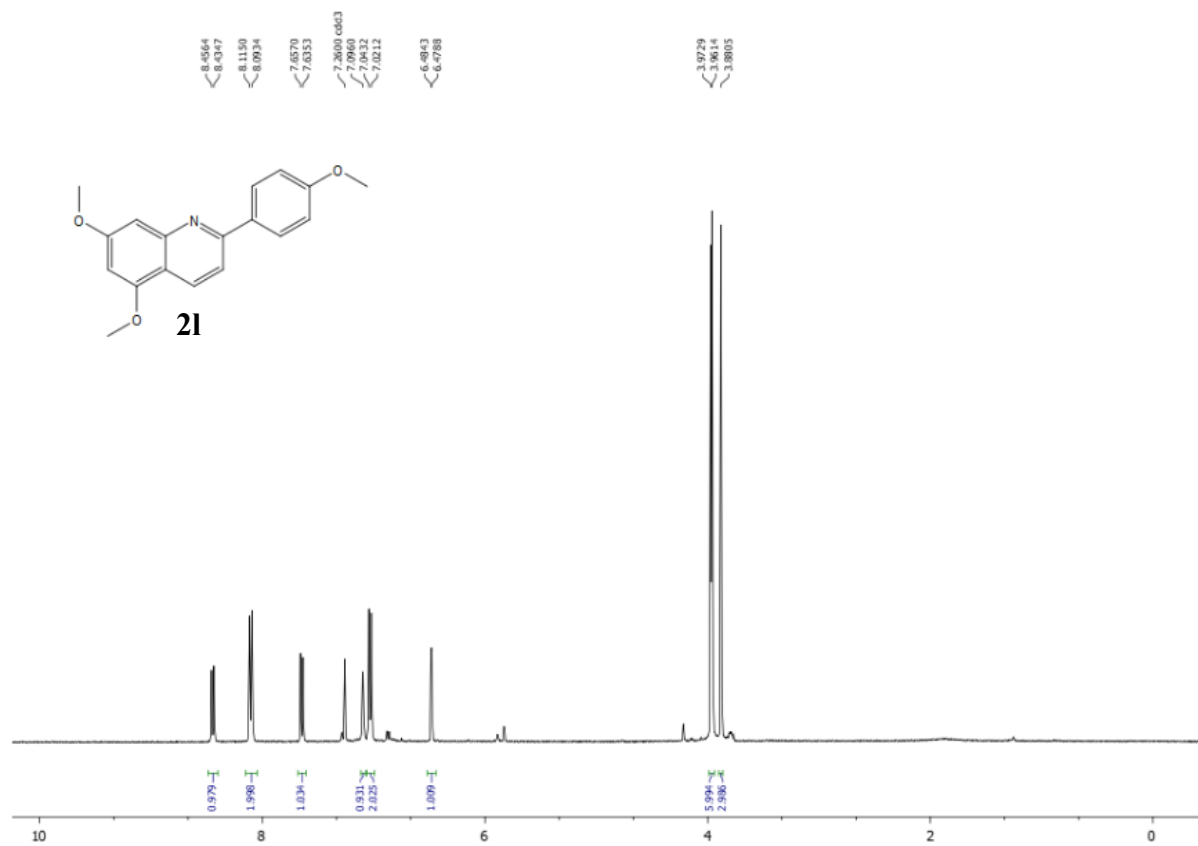

# $^{13}\text{C}\{^1\text{H}\}$ NMR of 2l (101 MHz, $\text{CDCl}_3$ )

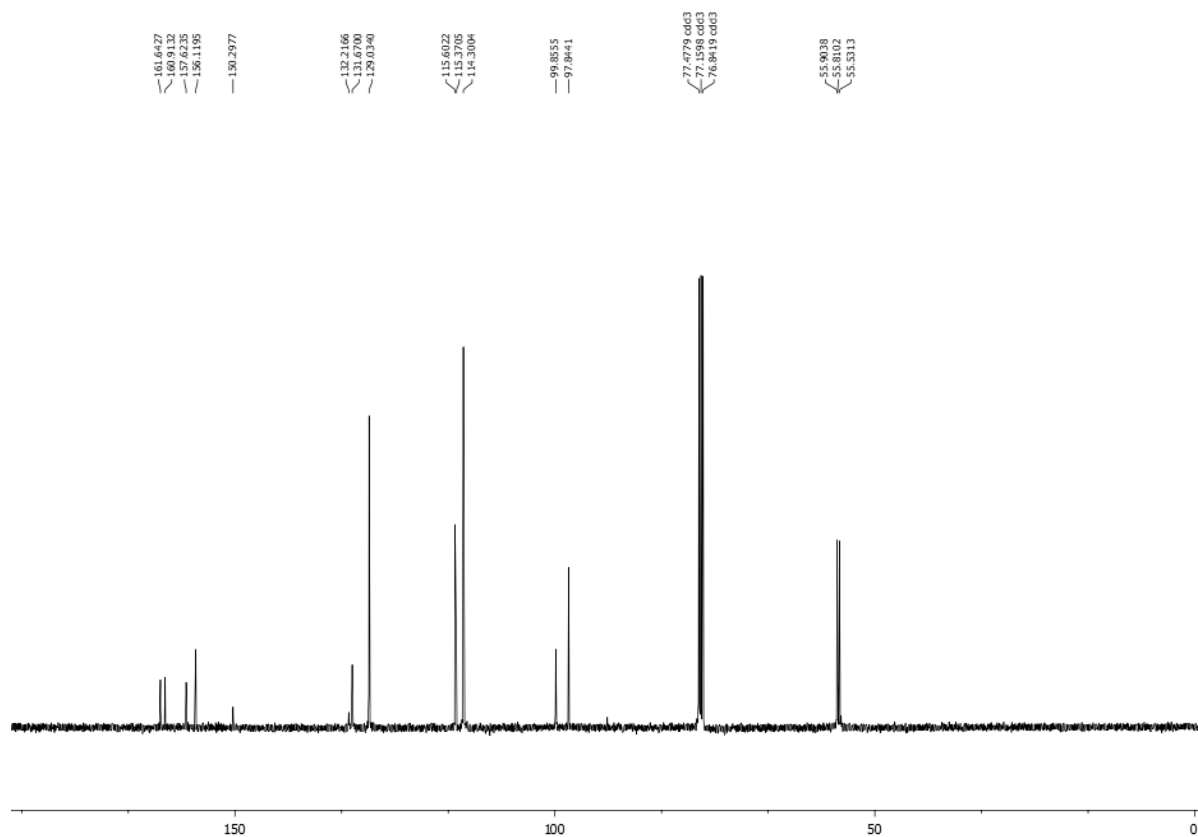

# $^1\text{H}$ NMR of 2m (400 MHz, $\text{CDCl}_3$ )

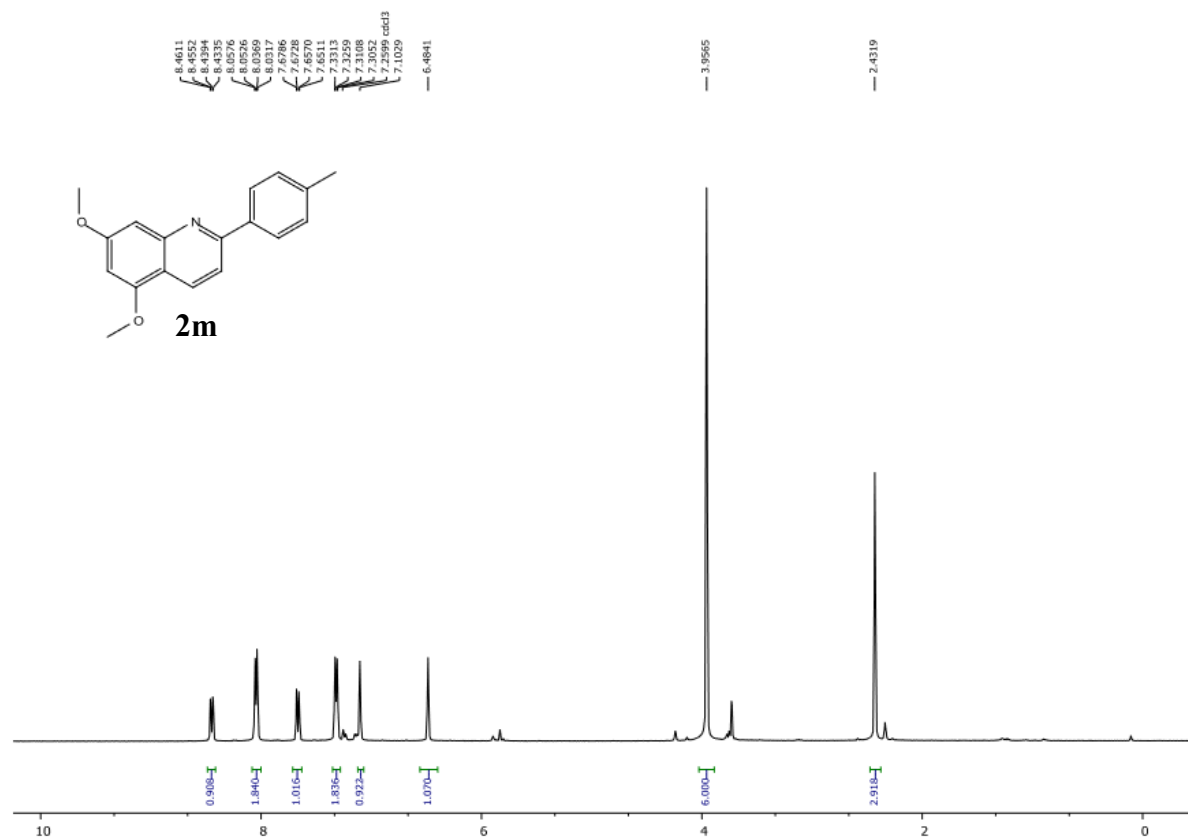

# $^{13}\text{C}\{^1\text{H}\}$ NMR of 2m (101 MHz, $\text{CDCl}_3$ )

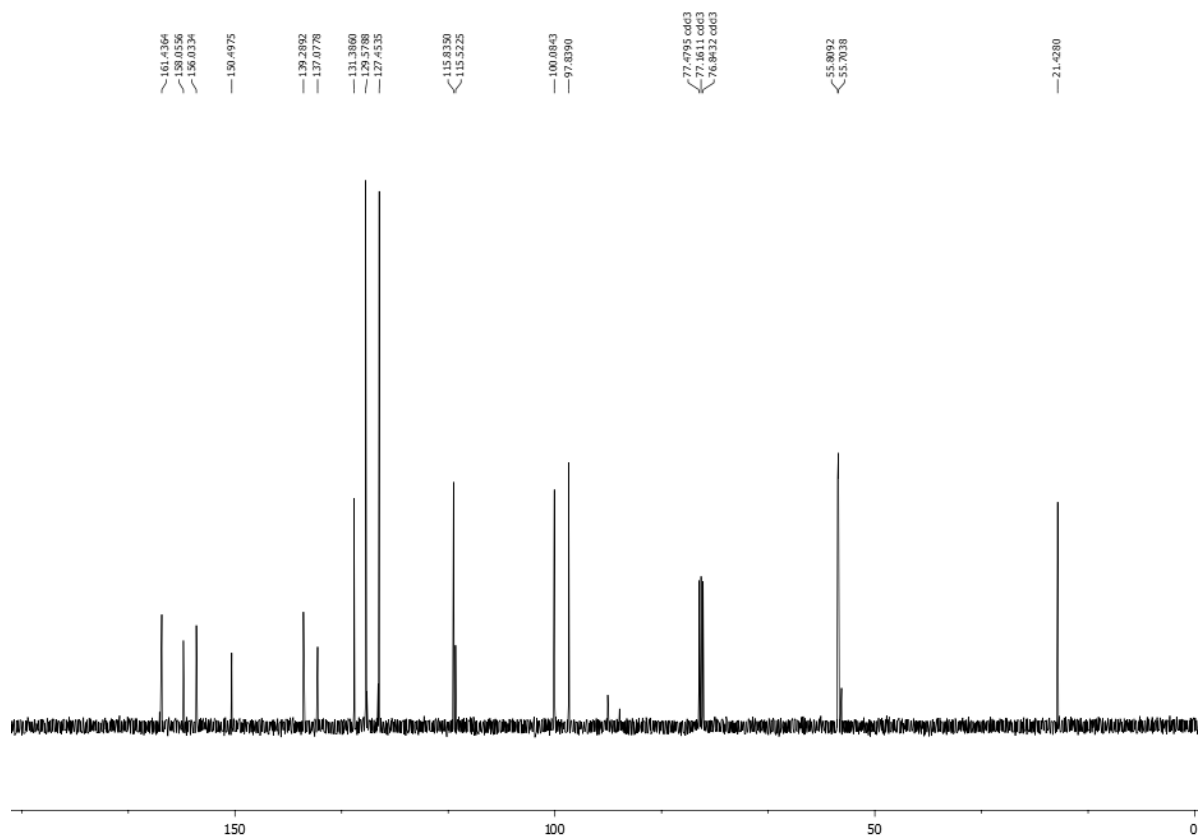

# $^1\text{H}$ NMR of **2n** (400 MHz, $\text{CDCl}_3$ )

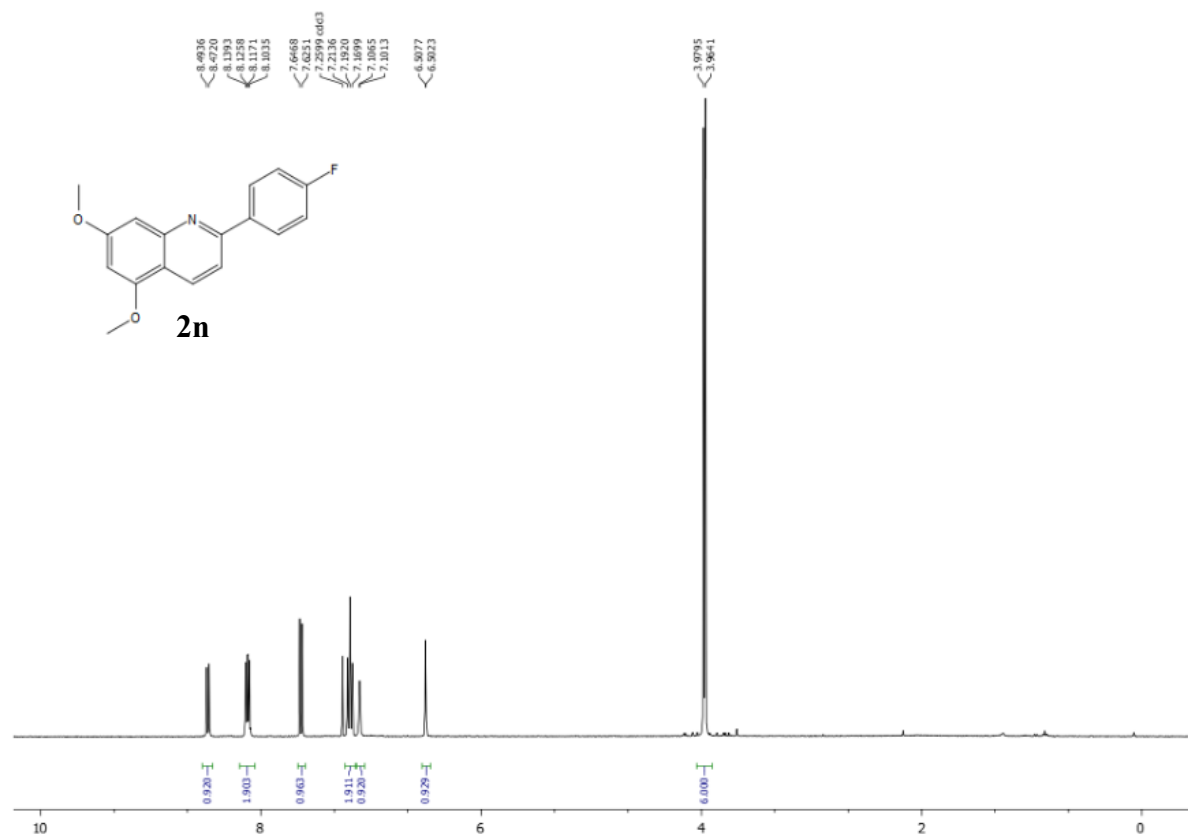

# $^{13}\text{C}\{^1\text{H}\}$ NMR of **2n** (101 MHz, $\text{CDCl}_3$ )

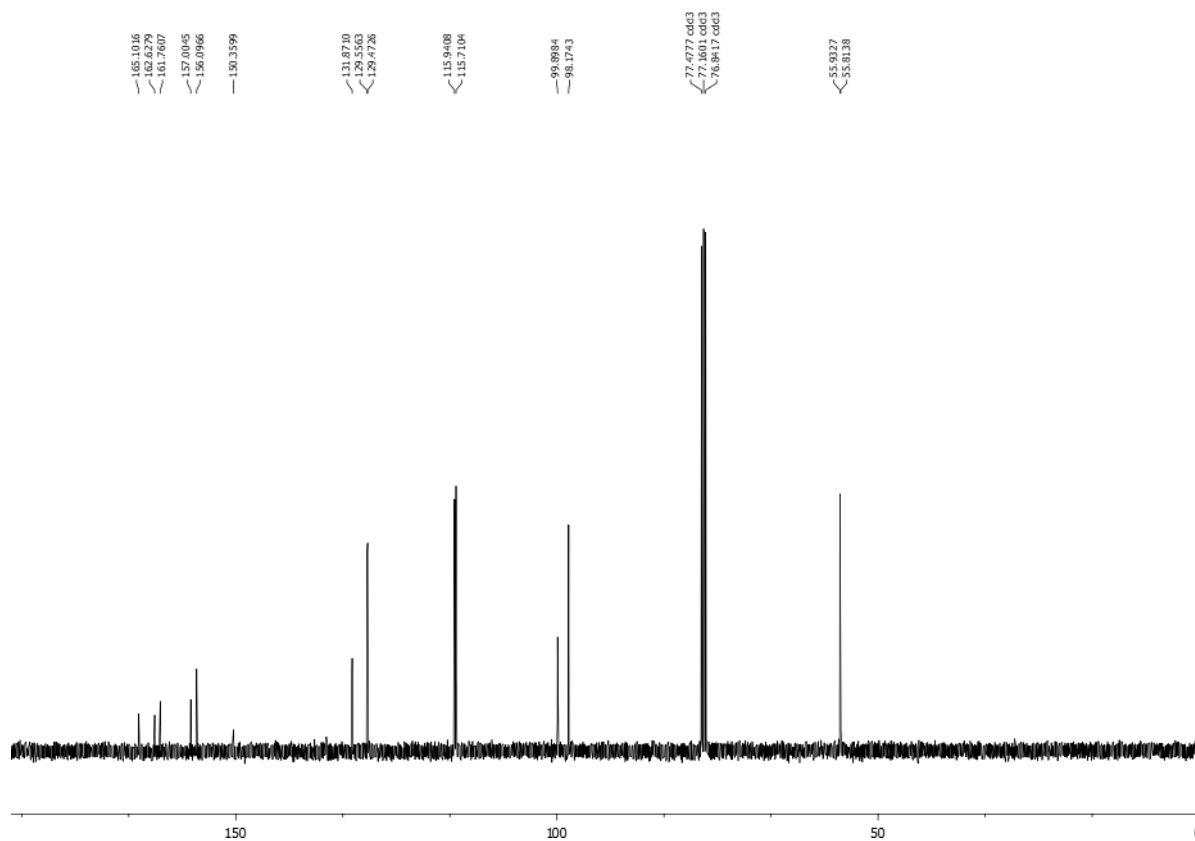

**$^{19}\text{F}$  NMR of 2n (376 MHz,  $\text{CDCl}_3$ )**

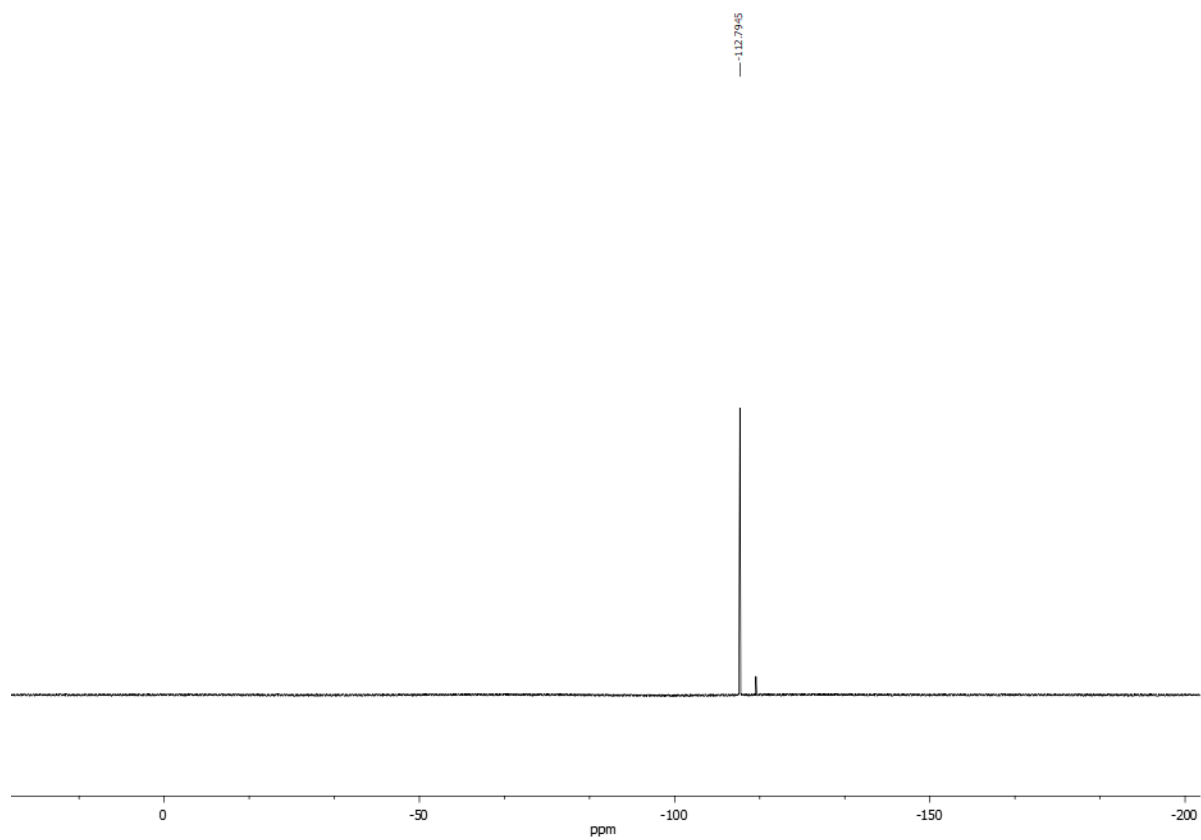



# $^1\text{H}$ NMR of **2o** (400 MHz, $\text{CDCl}_3$ )

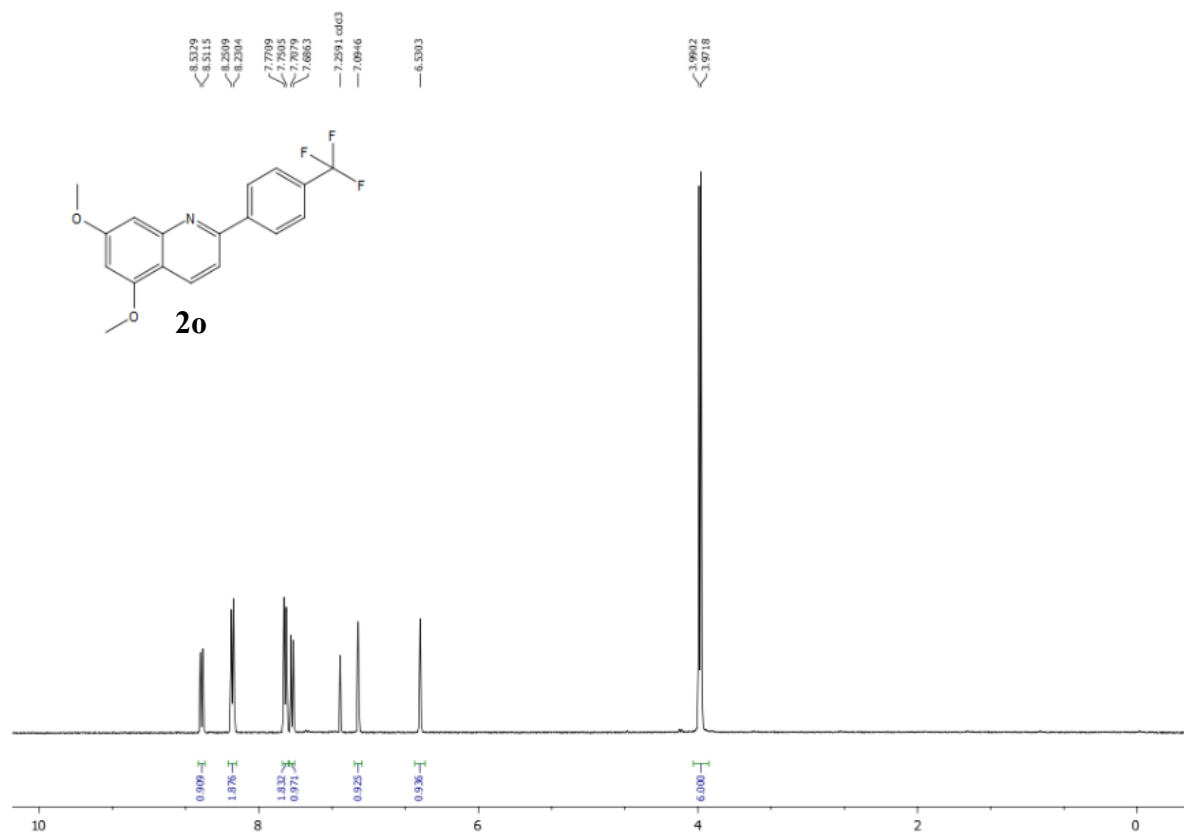

# $^{13}\text{C}\{^1\text{H}\}$ NMR of **2o** (101 MHz, $\text{CDCl}_3$ )

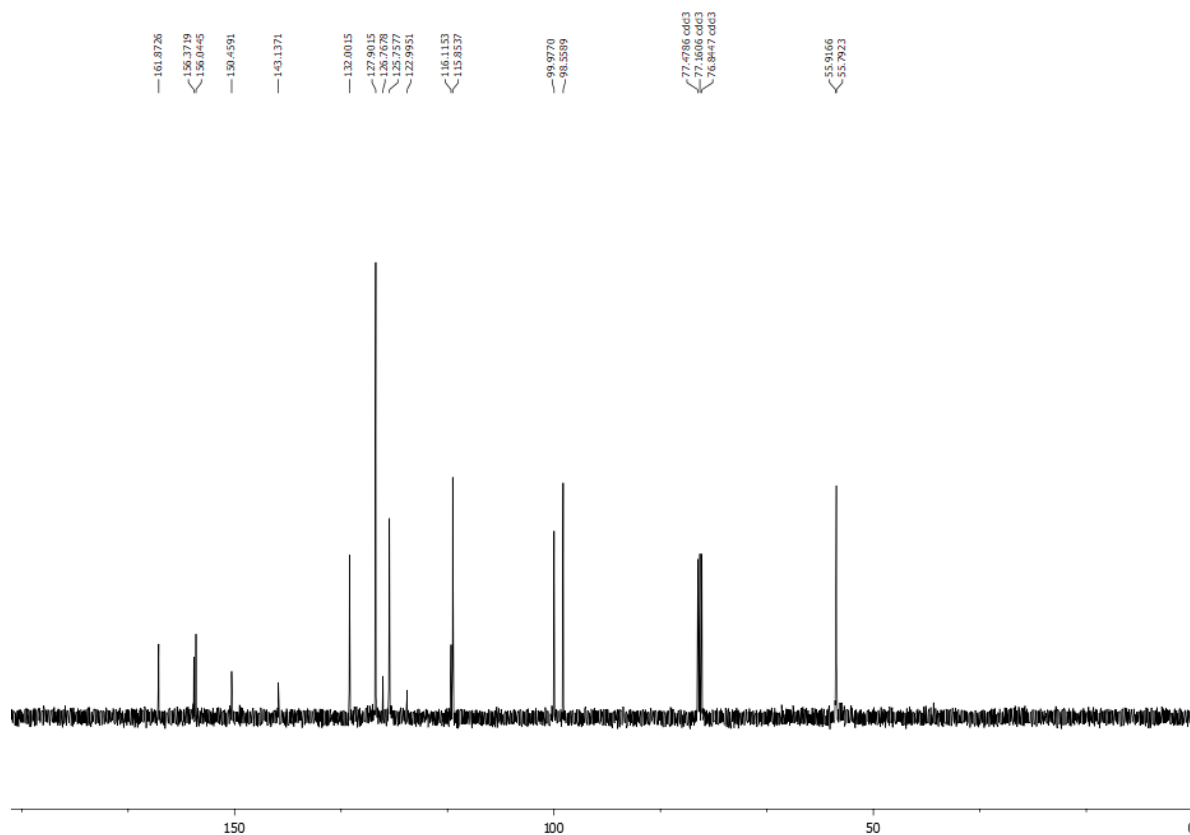

**$^{19}\text{F}$  NMR of 2o (376 MHz,  $\text{CDCl}_3$ )**

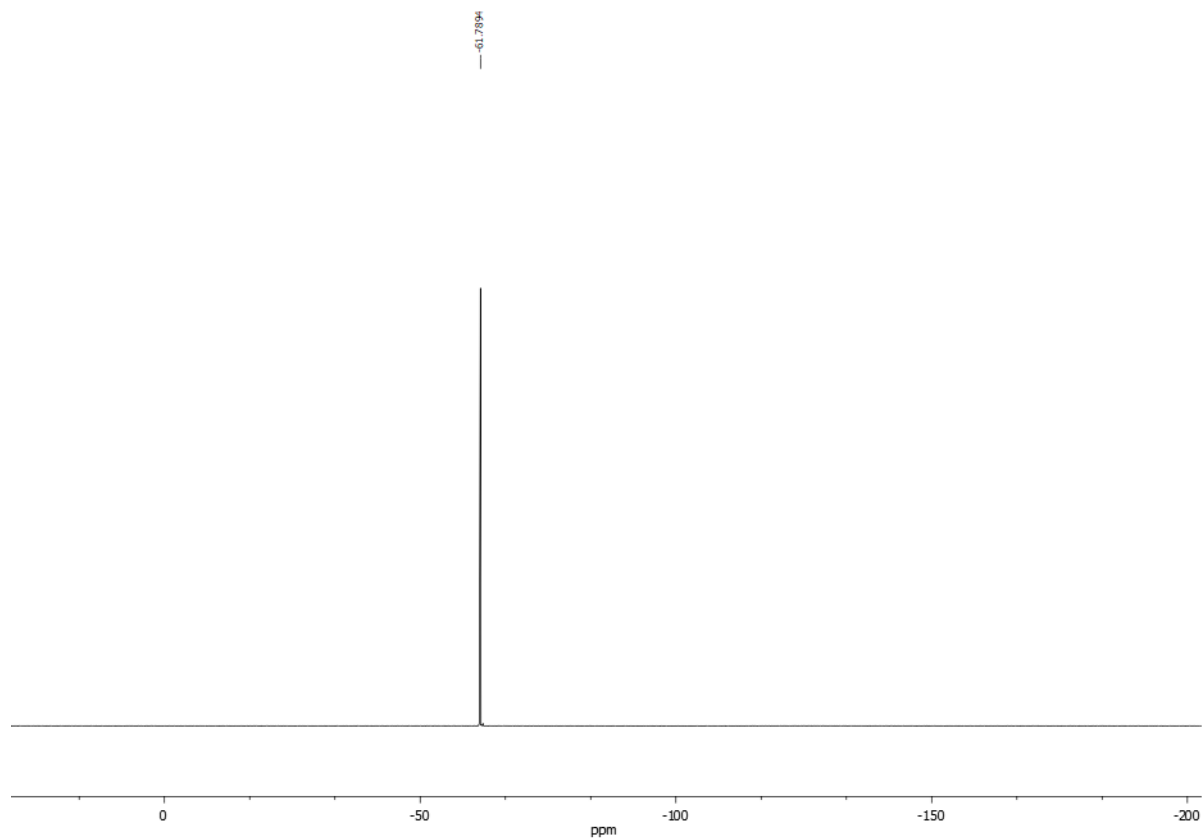

# $^1\text{H}$ NMR of 2p (400 MHz, $\text{CDCl}_3$ )

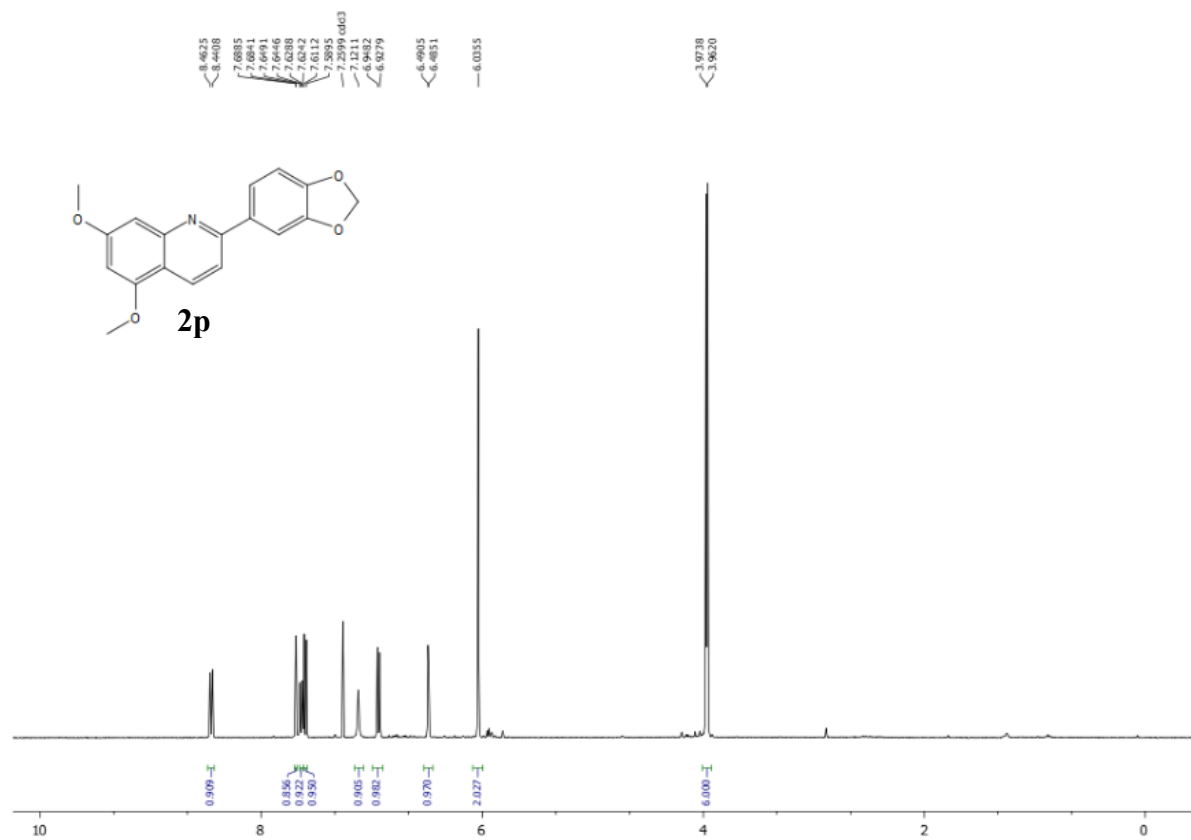

# $^{13}\text{C}\{^1\text{H}\}$ NMR of 2p (101 MHz, $\text{CDCl}_3$ )

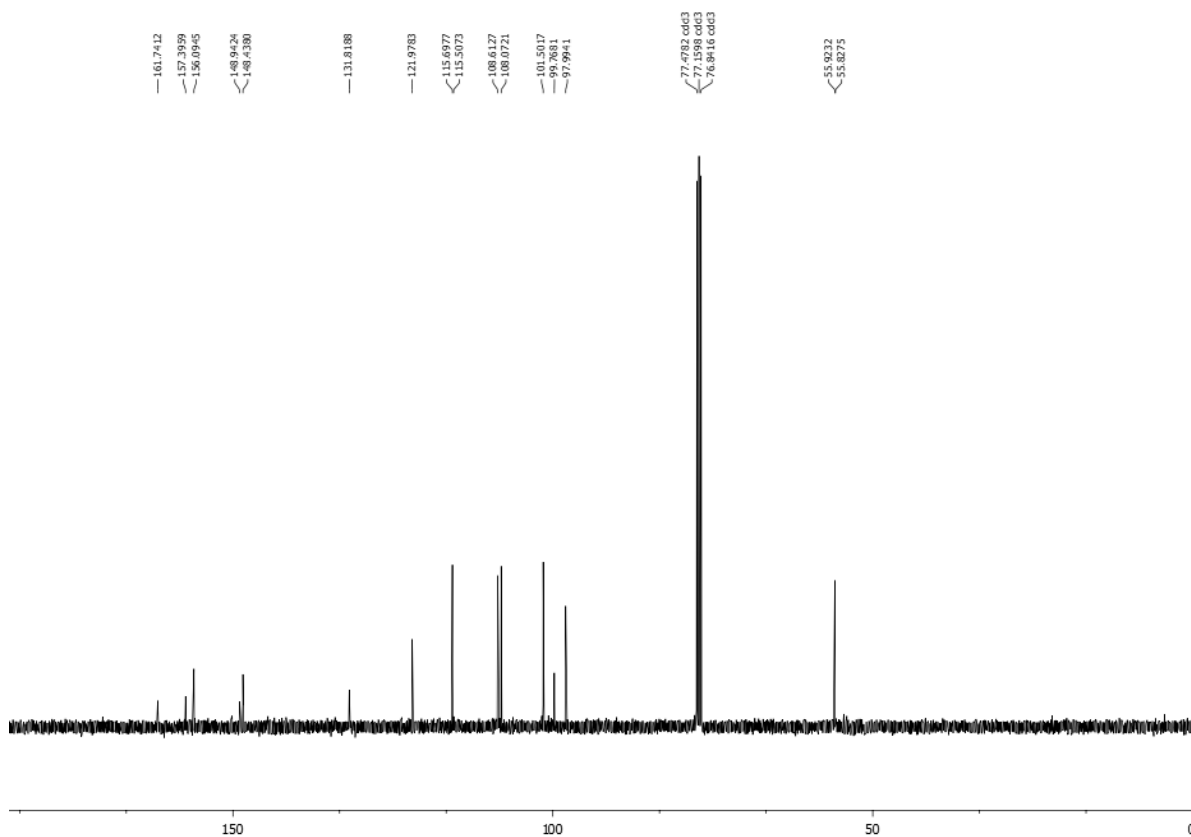

# <sup>1</sup>H NMR of 2q (400 MHz, CDCl<sub>3</sub>)

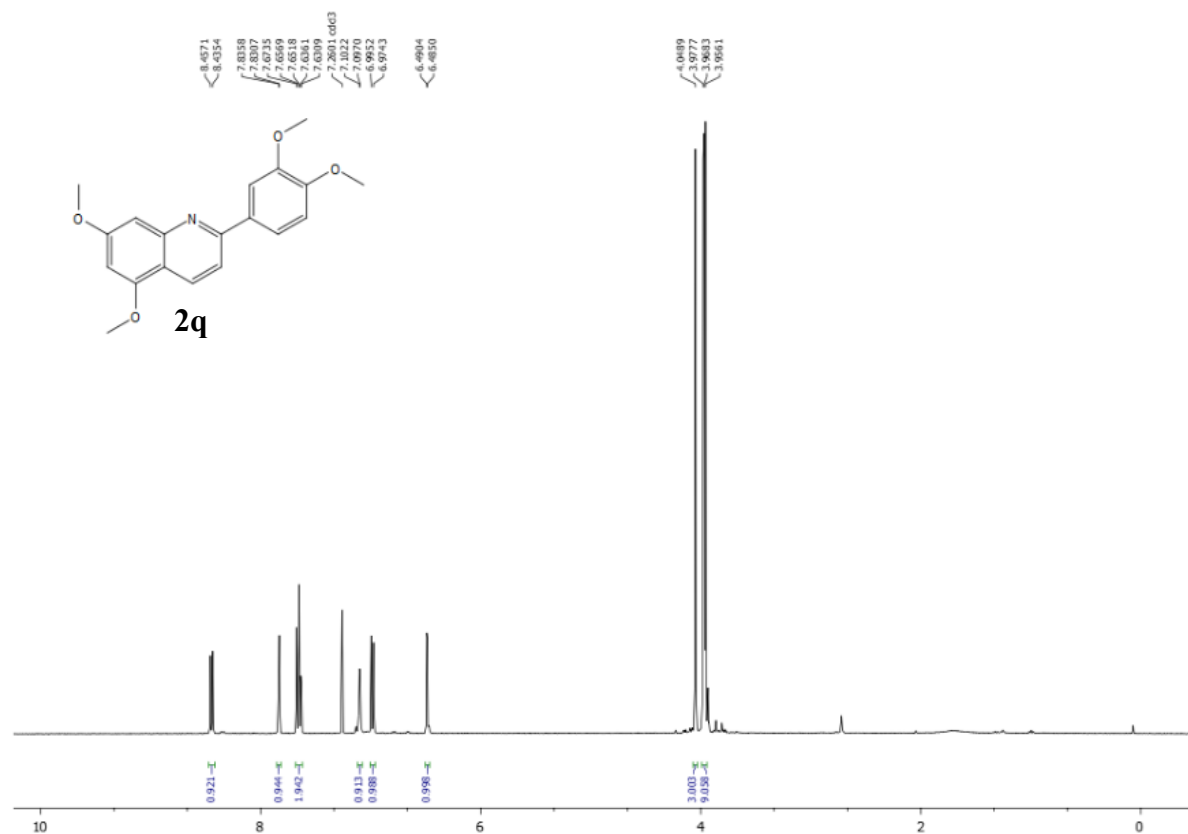

# <sup>13</sup>C{<sup>1</sup>H} NMR of 2q (101 MHz, CDCl<sub>3</sub>)

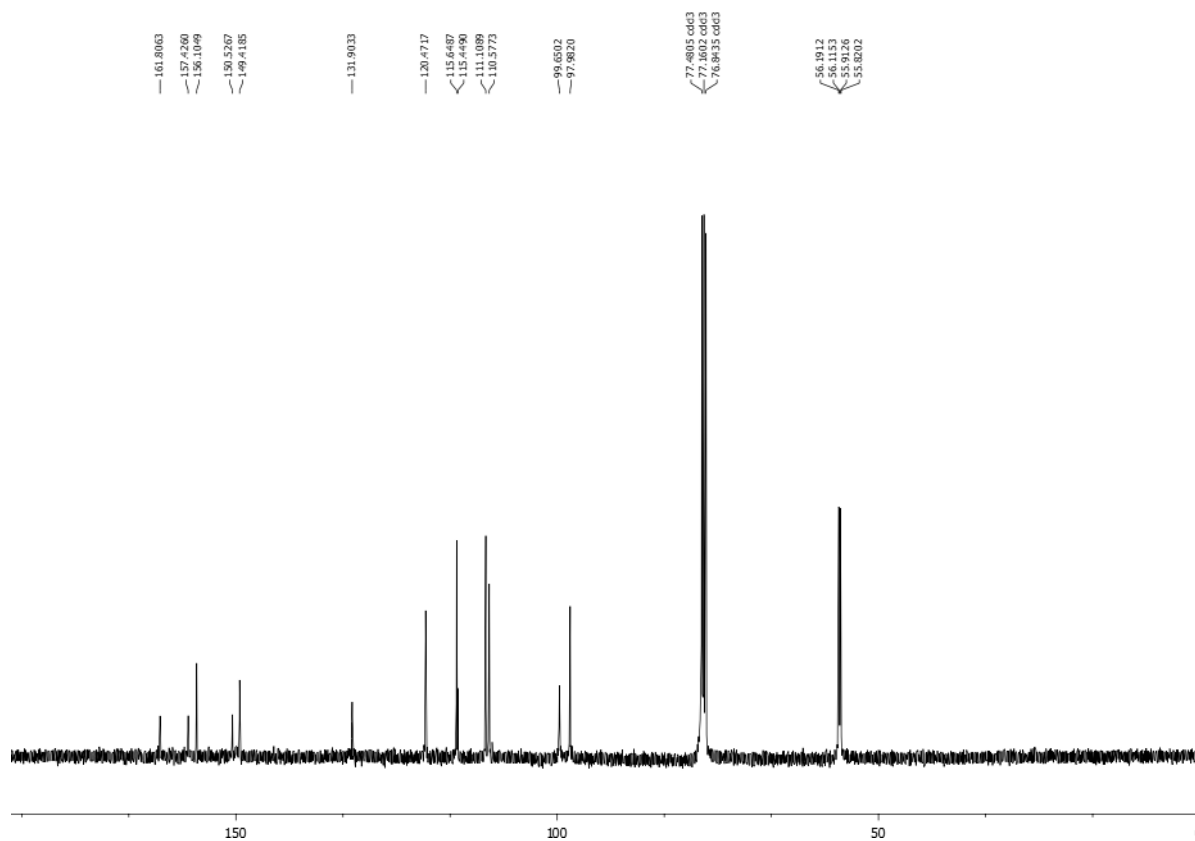

# $^1\text{H}$ NMR of 2r (400 MHz, $\text{CDCl}_3$ )

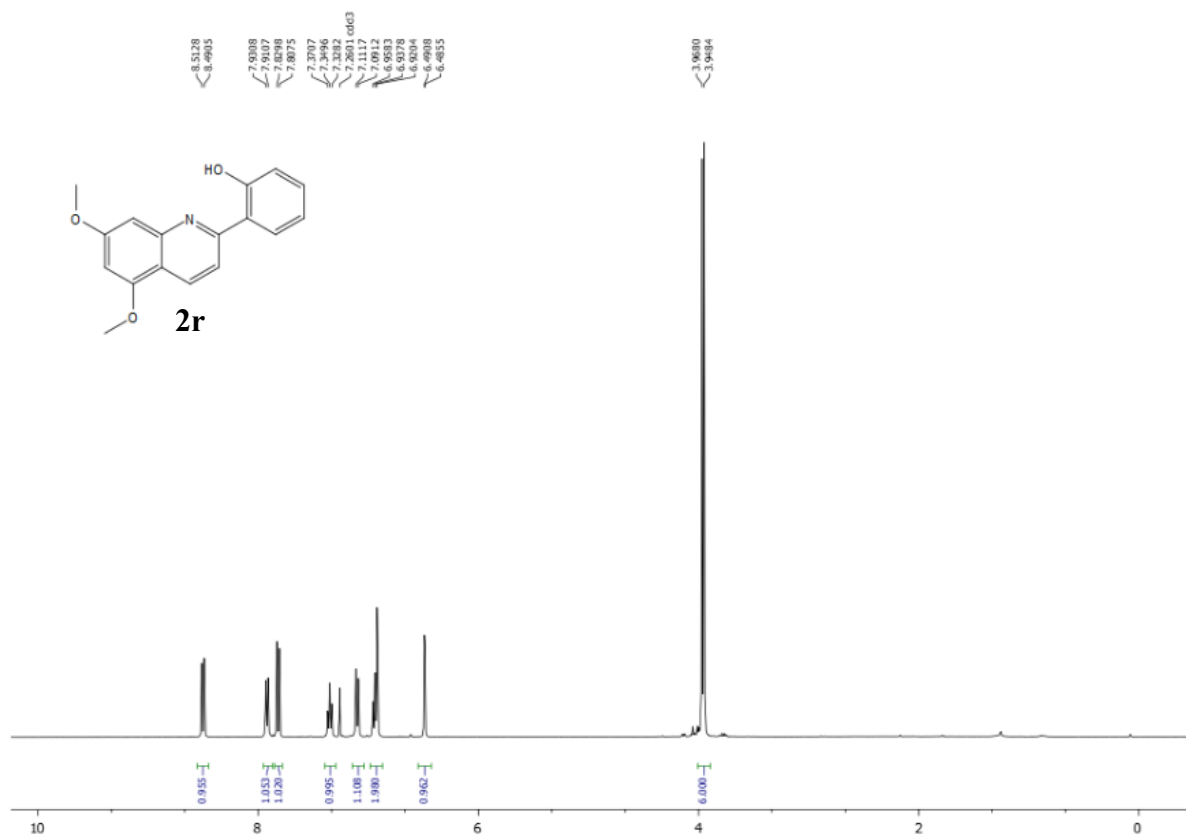

# $^{13}\text{C}\{^1\text{H}\}$ NMR of 2r (101 MHz, $\text{CDCl}_3$ )

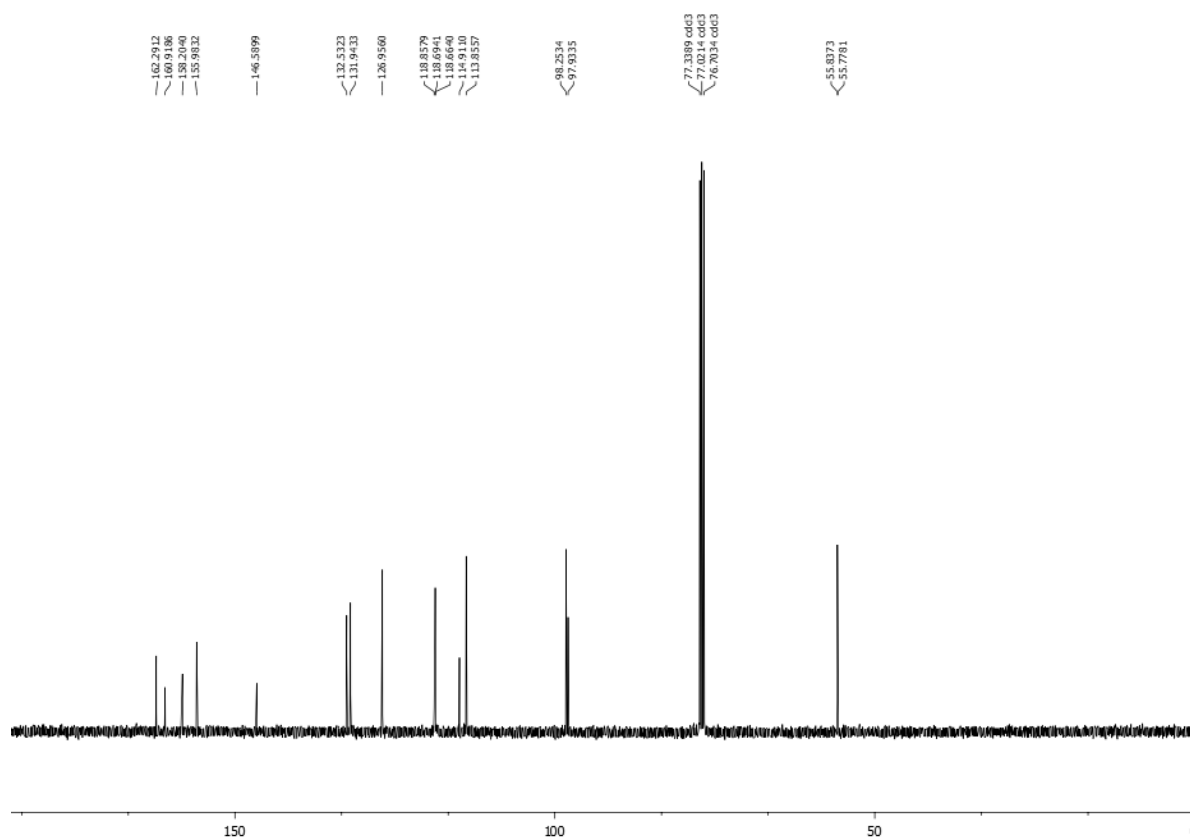

# $^1\text{H}$ NMR of 2s (400 MHz, $\text{CDCl}_3$ )

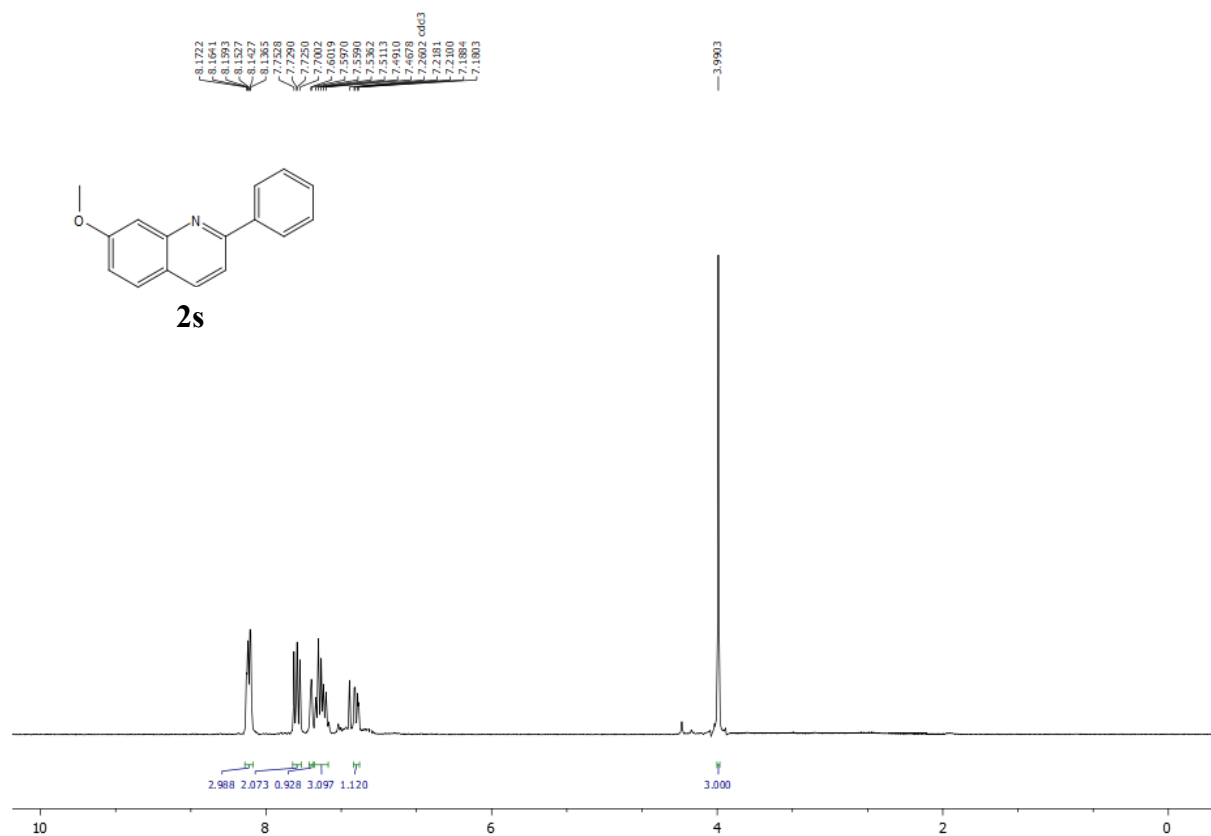

# $^{13}\text{C}\{^1\text{H}\}$ NMR of 2s (101 MHz, $\text{CDCl}_3$ )

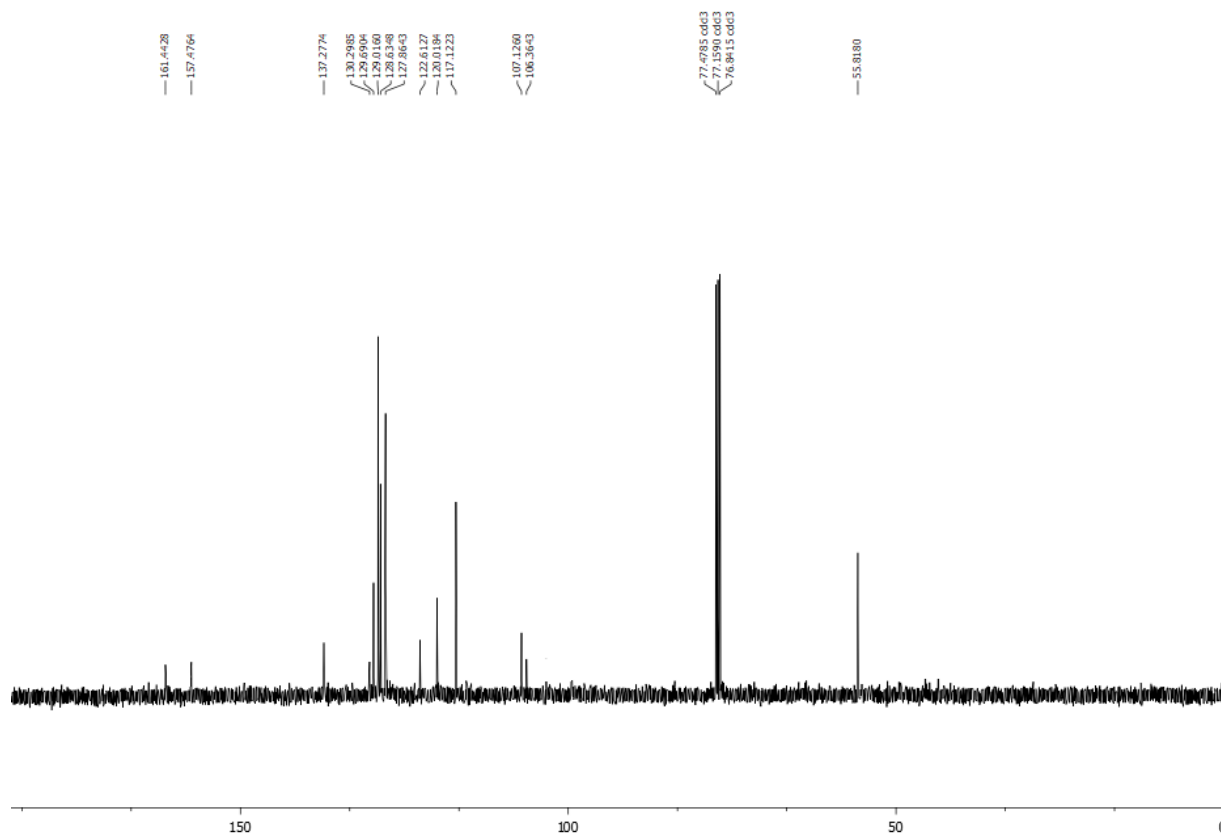

# $^1\text{H}$ NMR of 2t (400 MHz, $\text{CDCl}_3$ )

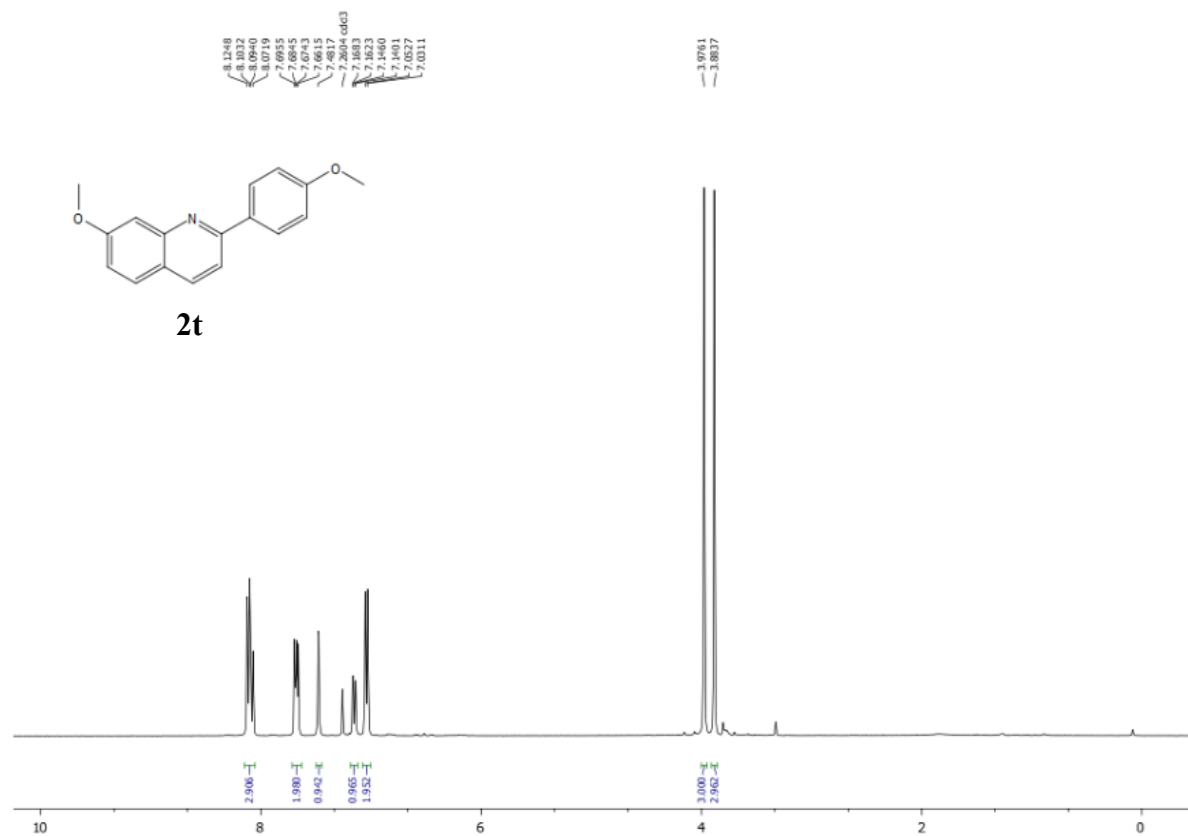

# $^{13}\text{C}\{^1\text{H}\}$ NMR of 2t (101 MHz, $\text{CDCl}_3$ )

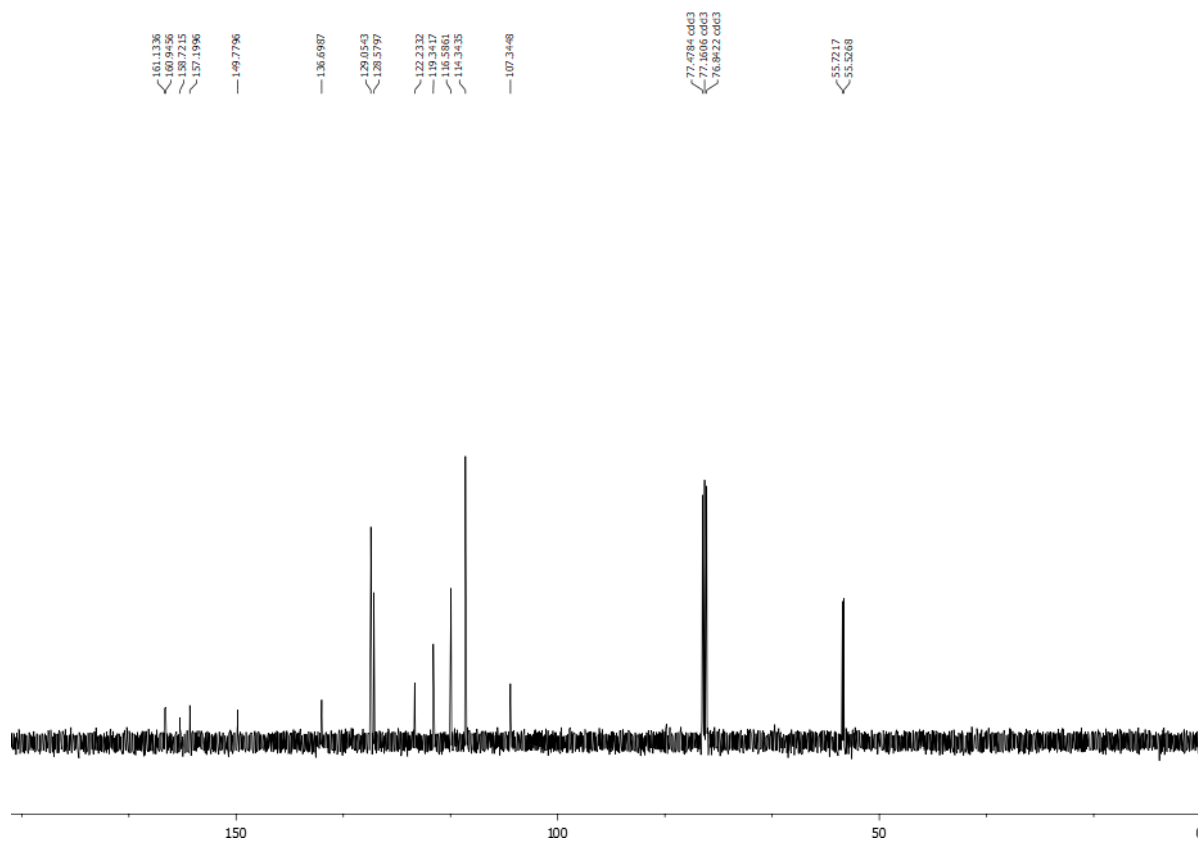

# $^1\text{H}$ NMR of **2u** (400 MHz, $\text{CDCl}_3$ )

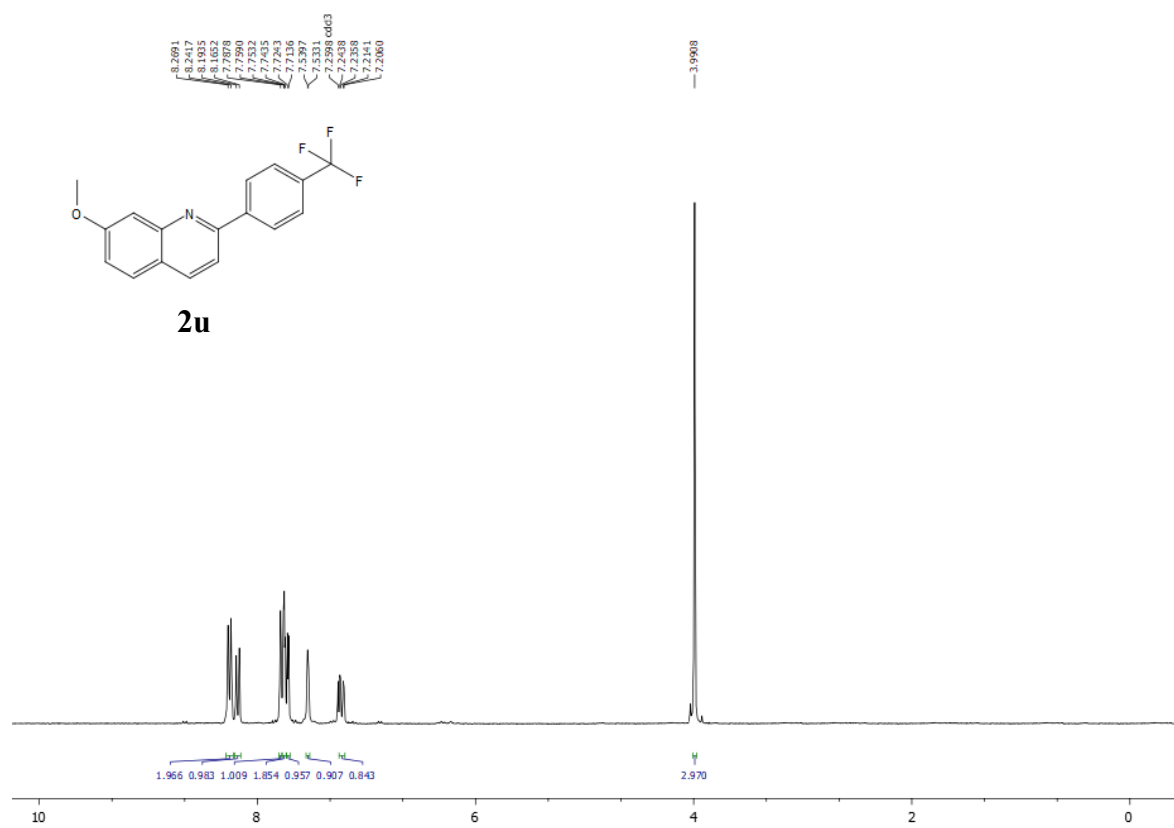

# $^{13}\text{C}\{^1\text{H}\}$ NMR of **2u** (101 MHz, $\text{CDCl}_3$ )

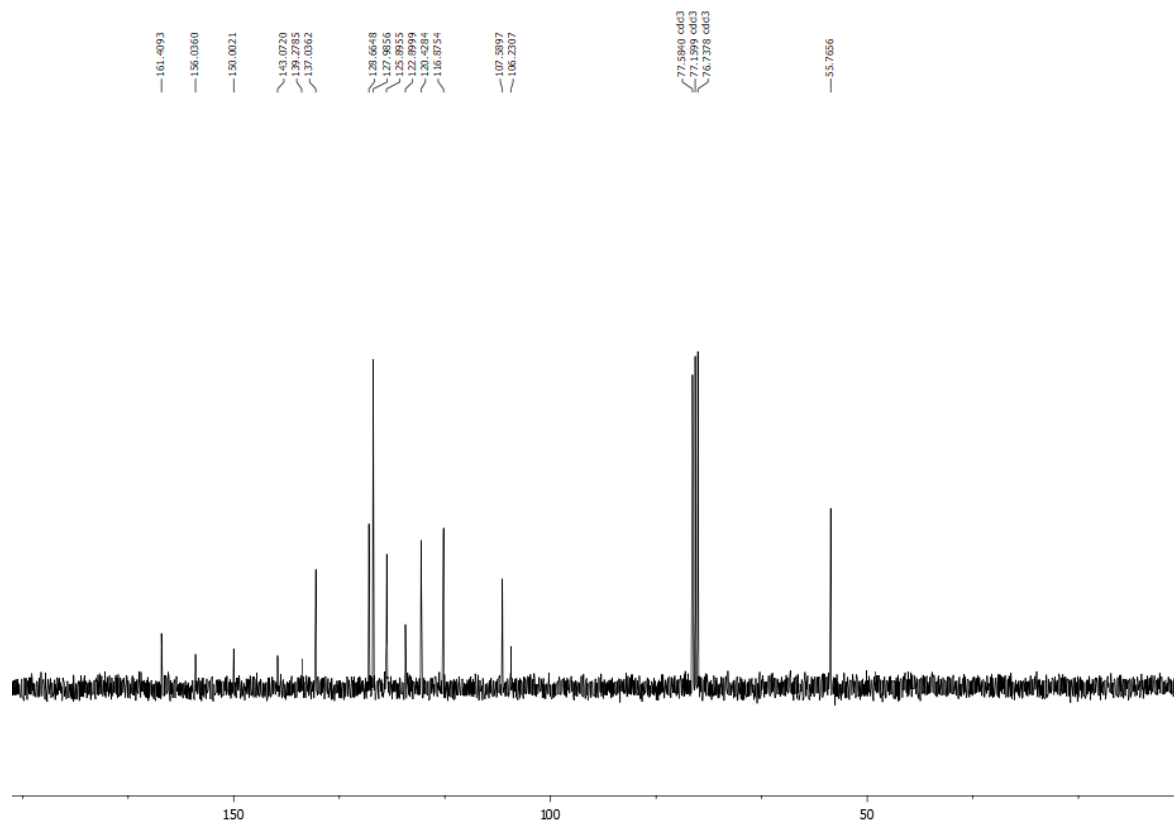



**$^{19}\text{F}$  NMR of 2u (376 MHz,  $\text{CDCl}_3$ )**

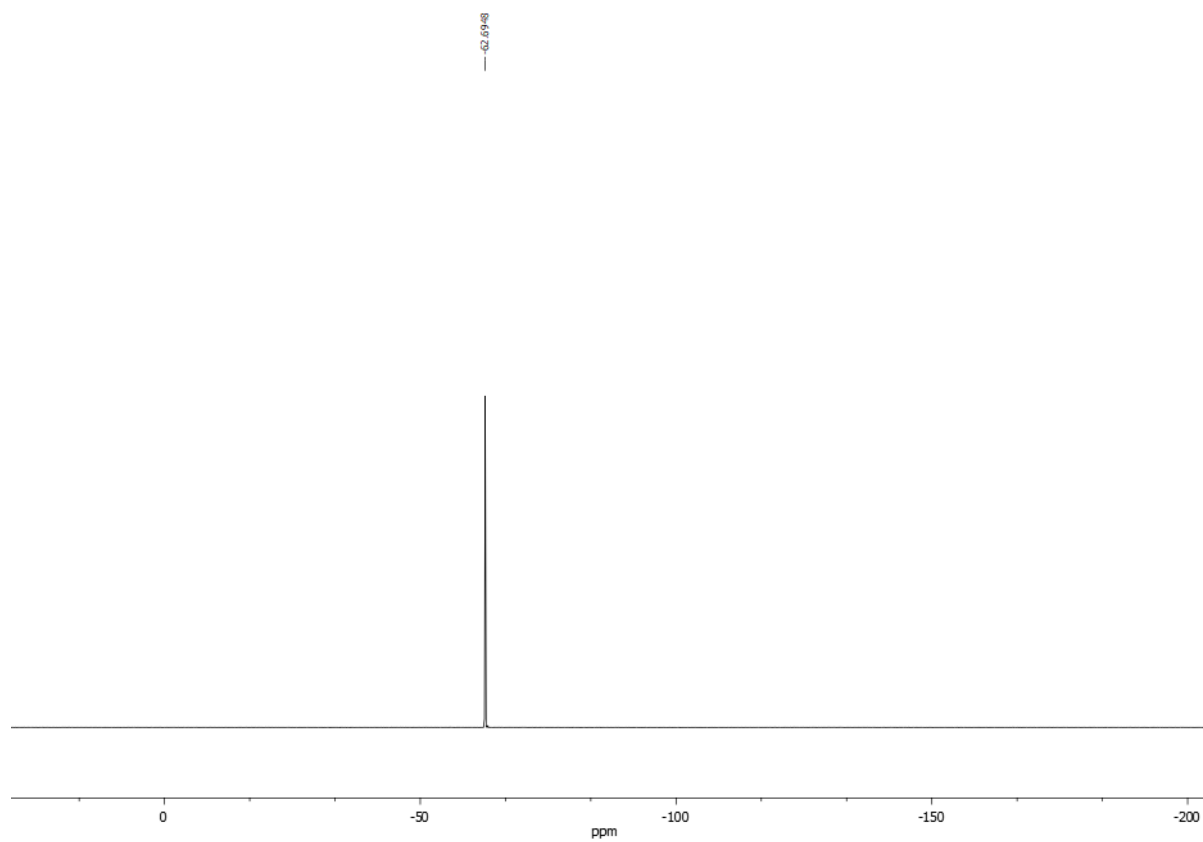

# $^1\text{H}$ NMR of 2v (400 MHz, $\text{CDCl}_3$ )

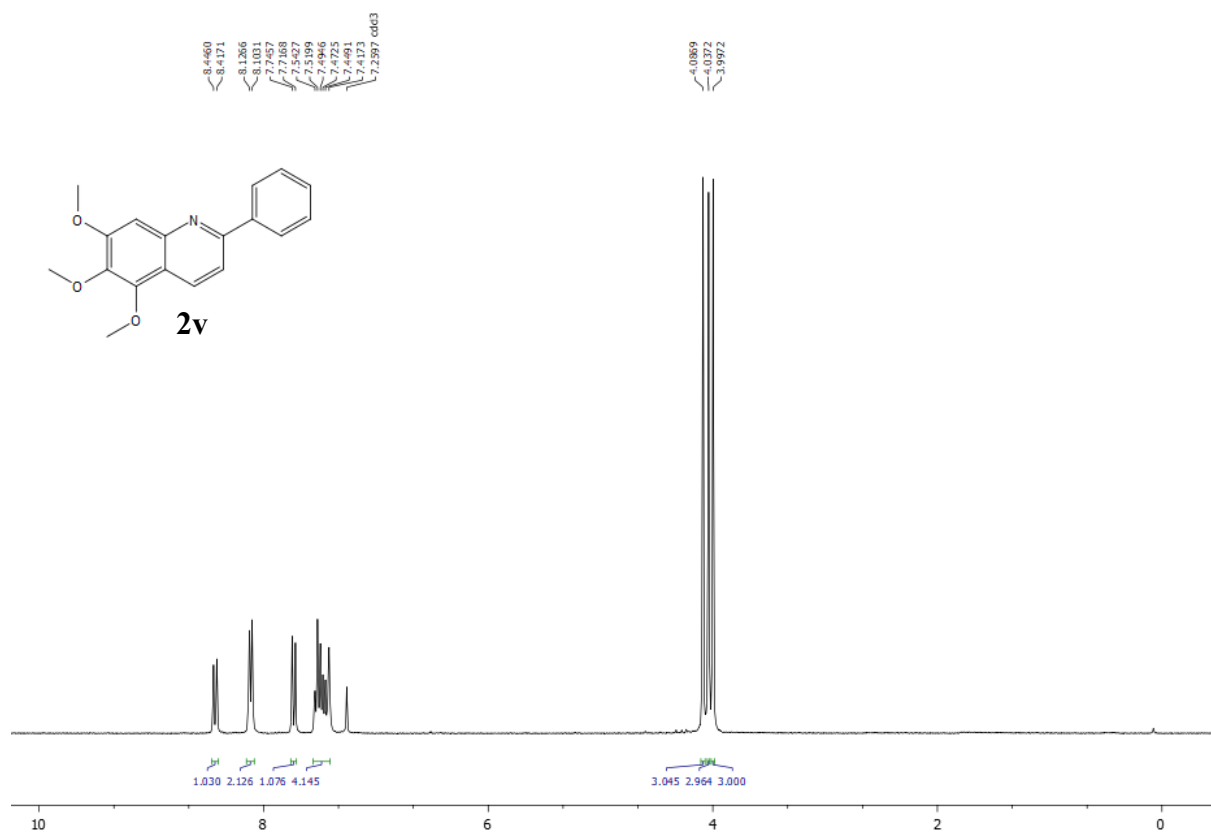

# $^{13}\text{C}\{^1\text{H}\}$ NMR of 2v (101 MHz, $\text{CDCl}_3$ )

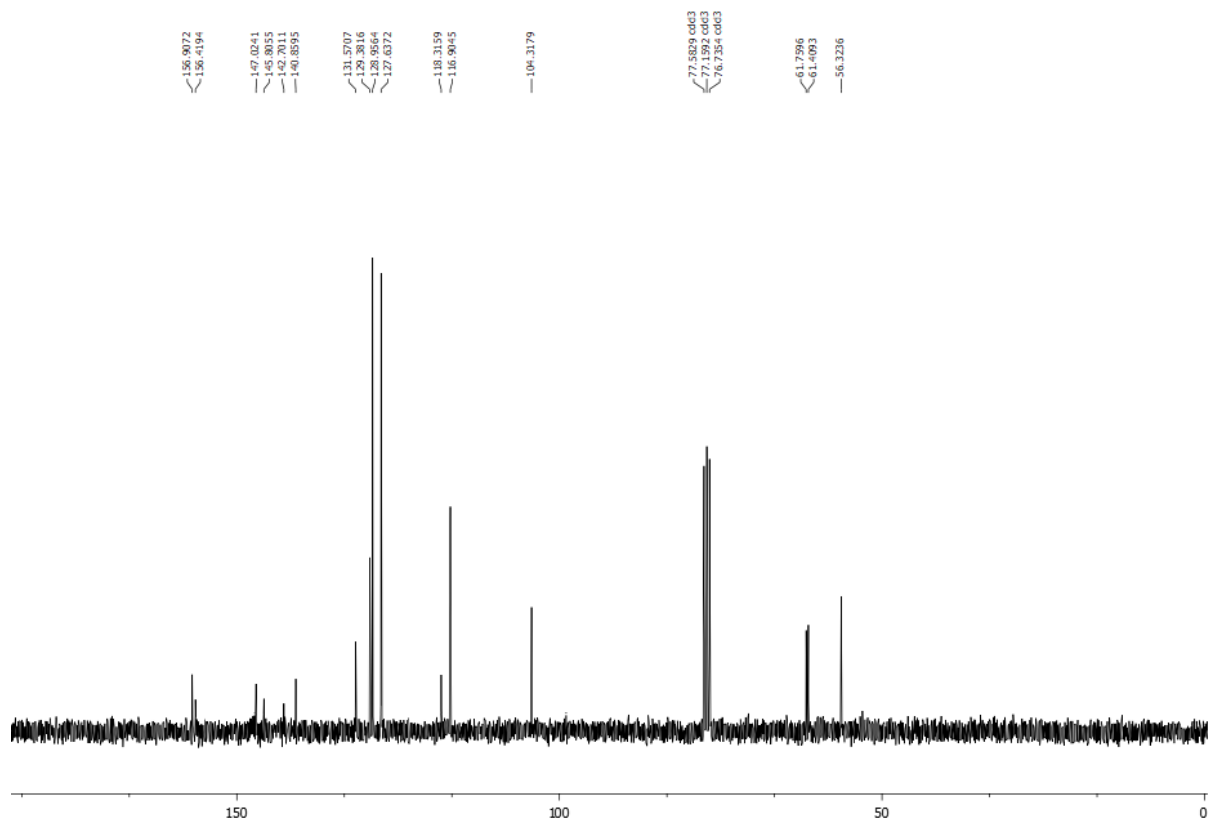

# <sup>1</sup>H NMR of 2w (400 MHz, CDCl<sub>3</sub>)

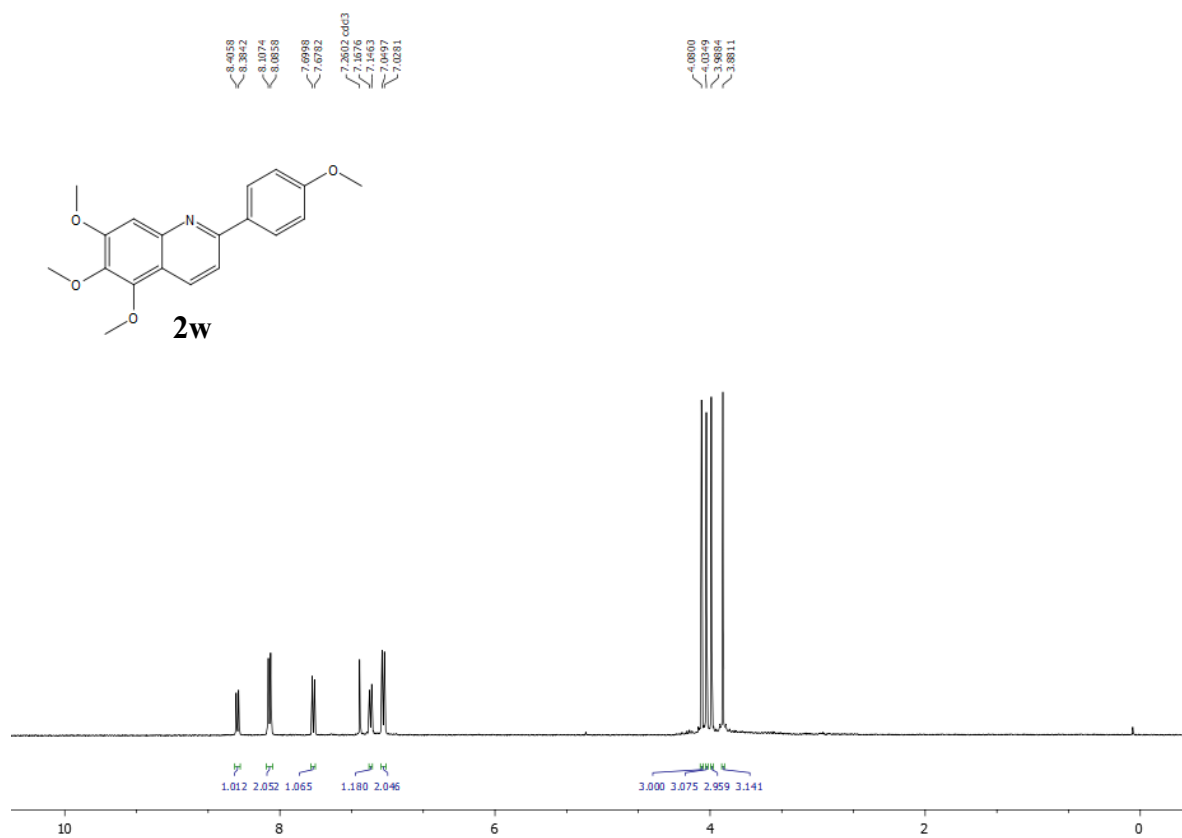

# <sup>13</sup>C{<sup>1</sup>H} NMR of 2w (101 MHz, CDCl<sub>3</sub>)

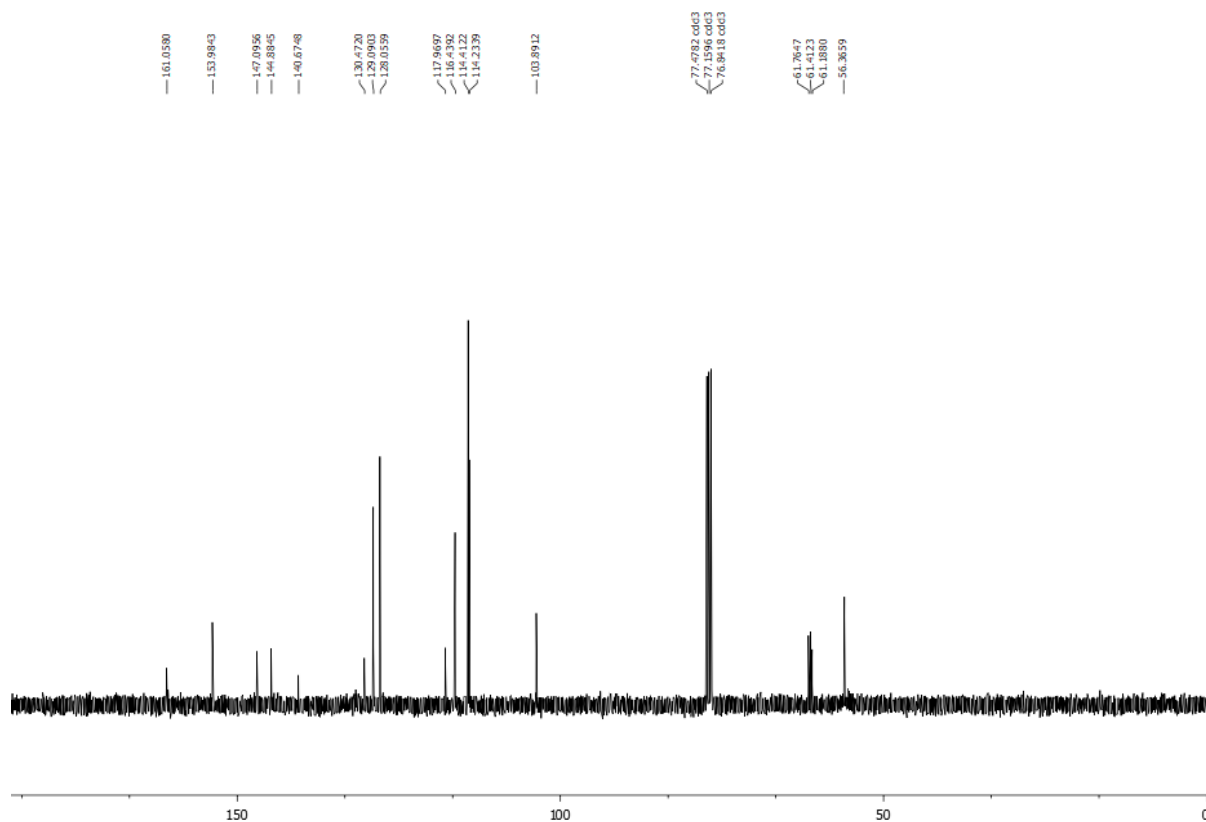

# $^1\text{H}$ NMR of 2x (400 MHz, $\text{CDCl}_3$ )

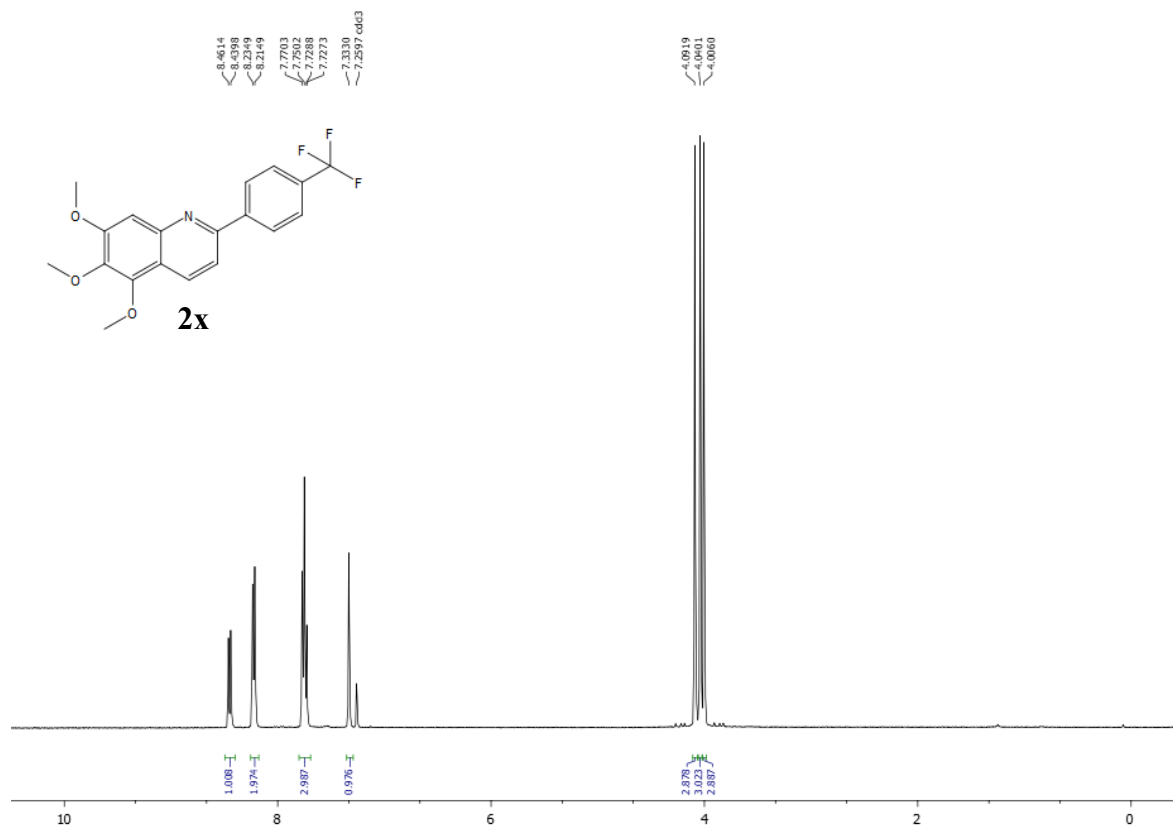

# $^{13}\text{C}\{^1\text{H}\}$ NMR of 2x (101 MHz, $\text{CDCl}_3$ )

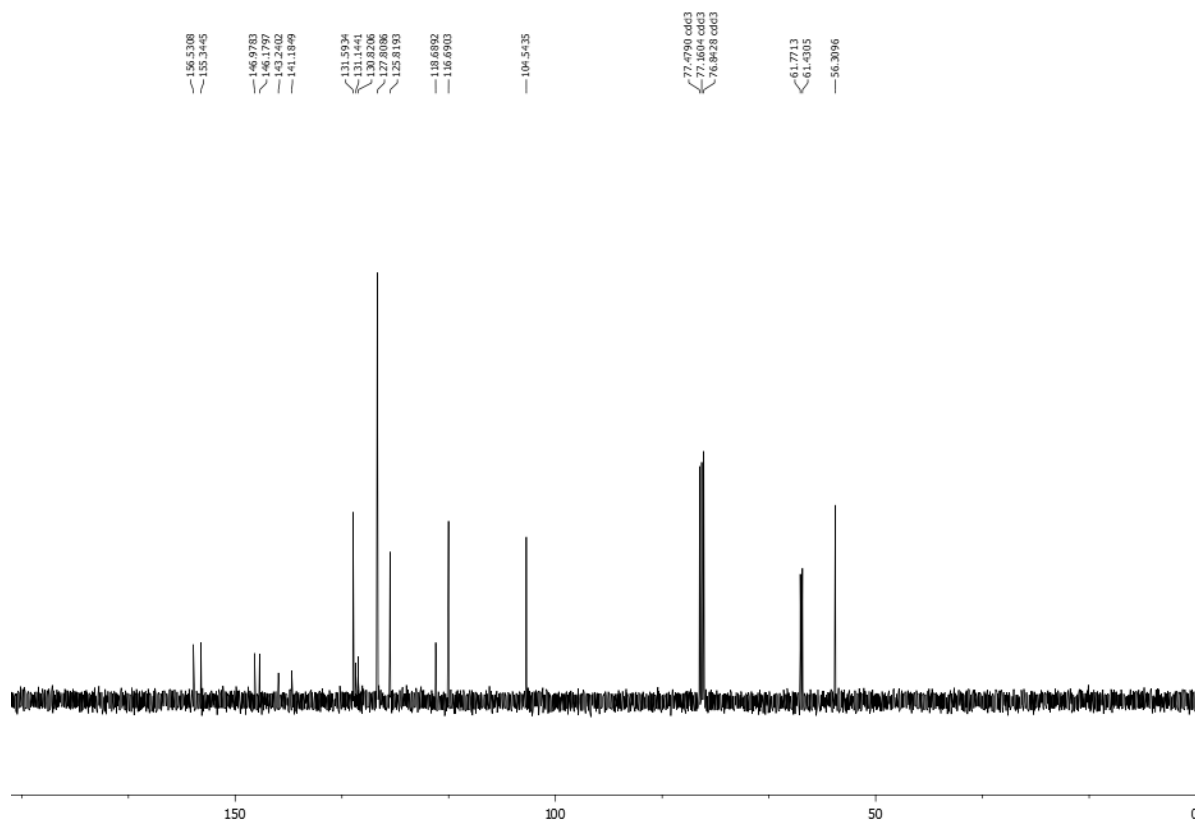

**$^{19}\text{F}$  NMR of 2x (376 MHz,  $\text{CDCl}_3$ )**

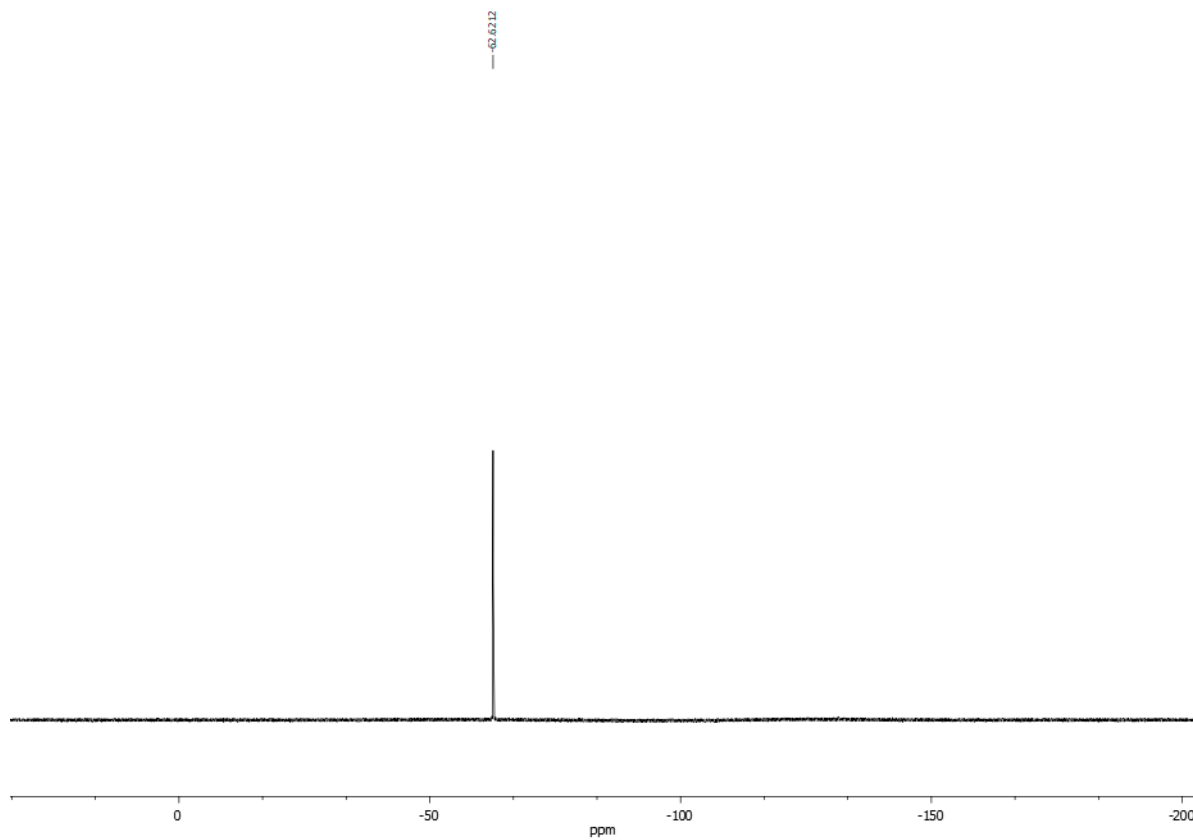

# $^1\text{H}$ NMR of 2y (400 MHz, $\text{CDCl}_3$ )

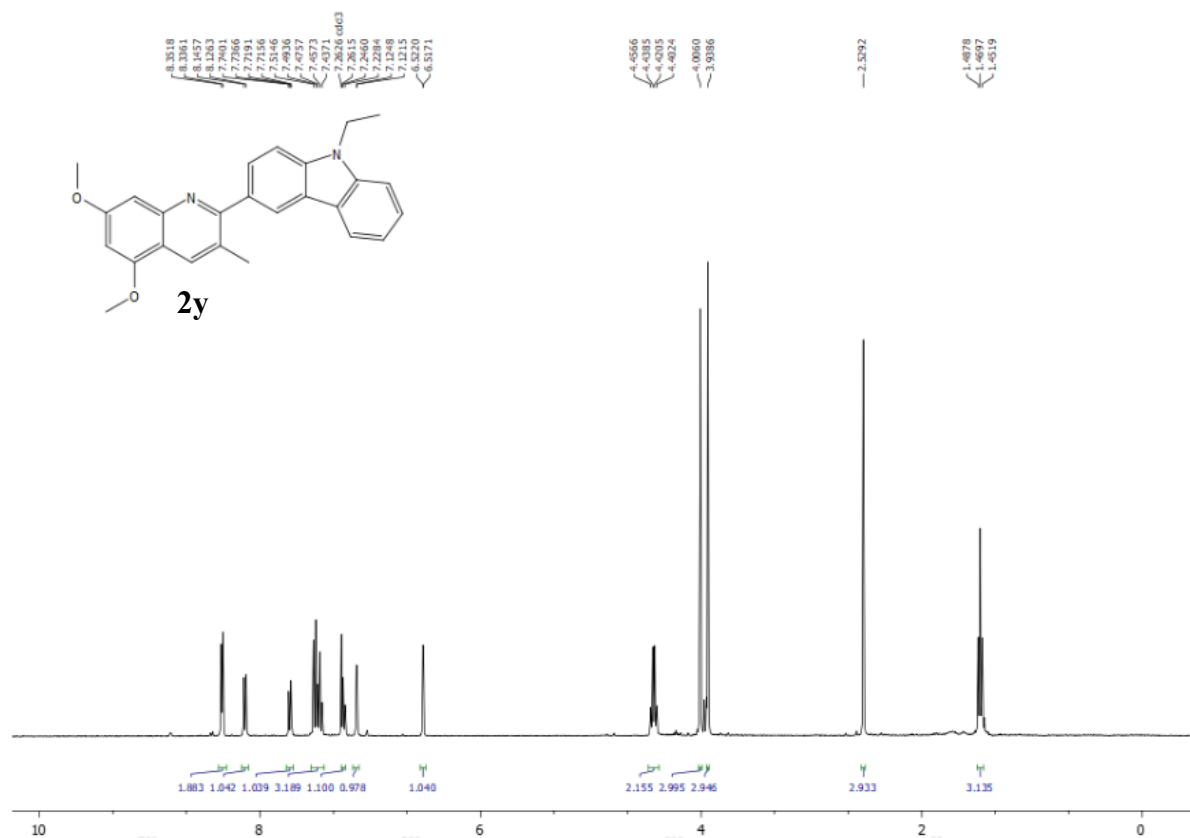

# $^{13}\text{C}\{^1\text{H}\}$ NMR of 2y (101 MHz, $\text{CDCl}_3$ )

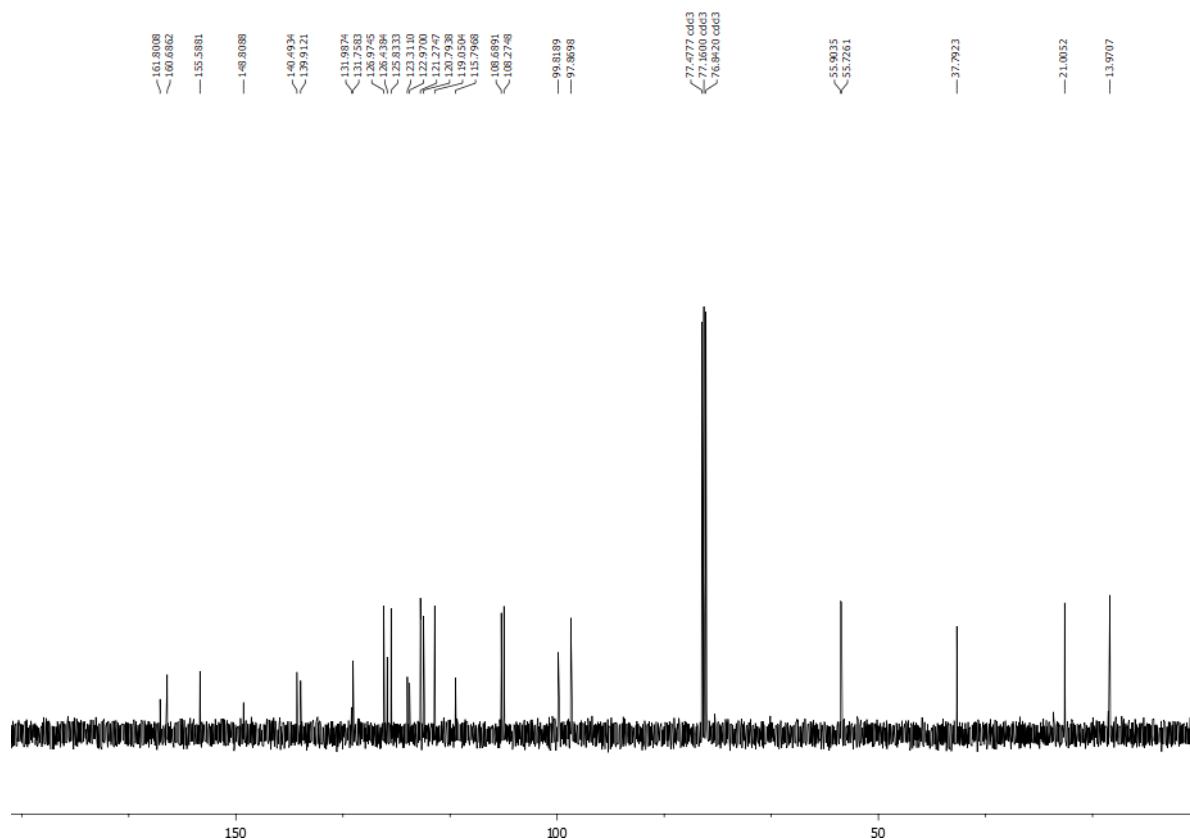

# $^1\text{H}$ NMR of **2z** (400 MHz, $\text{CDCl}_3$ )

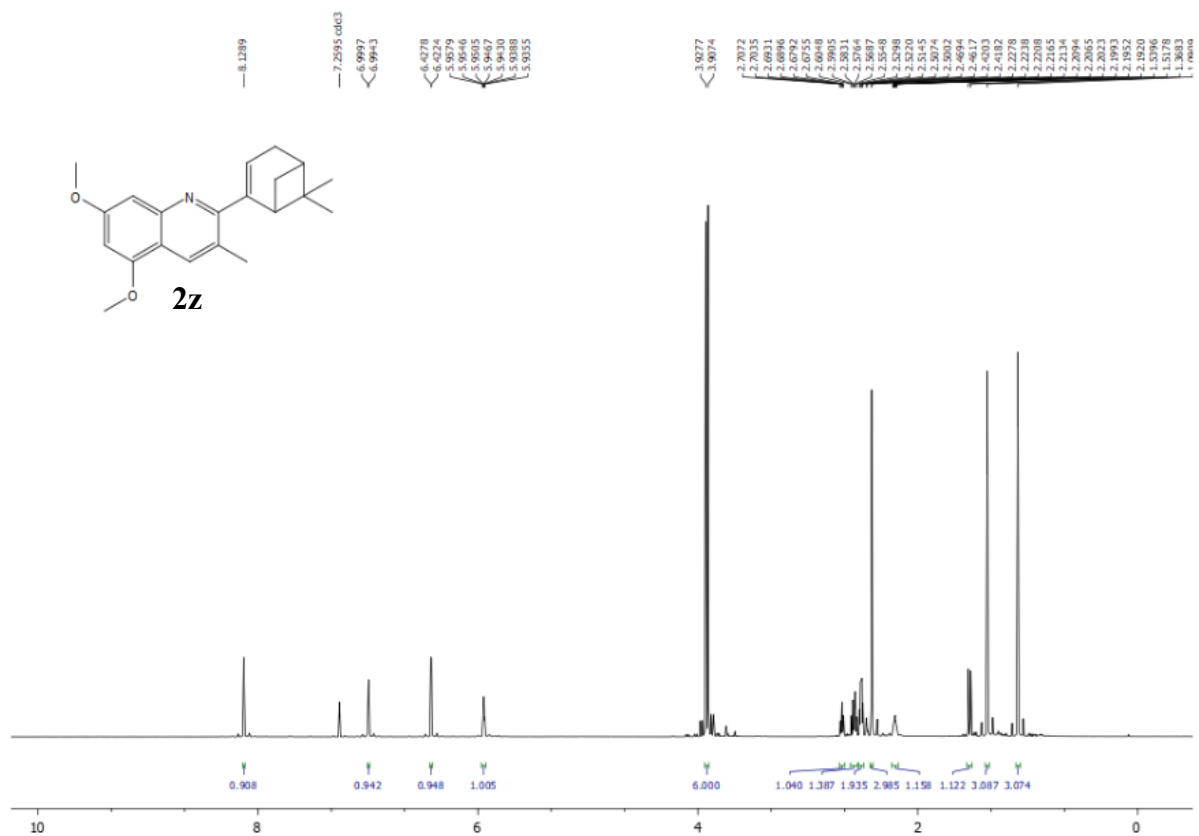

# $^{13}\text{C}\{^1\text{H}\}$ NMR of **2z** (101 MHz, $\text{CDCl}_3$ )

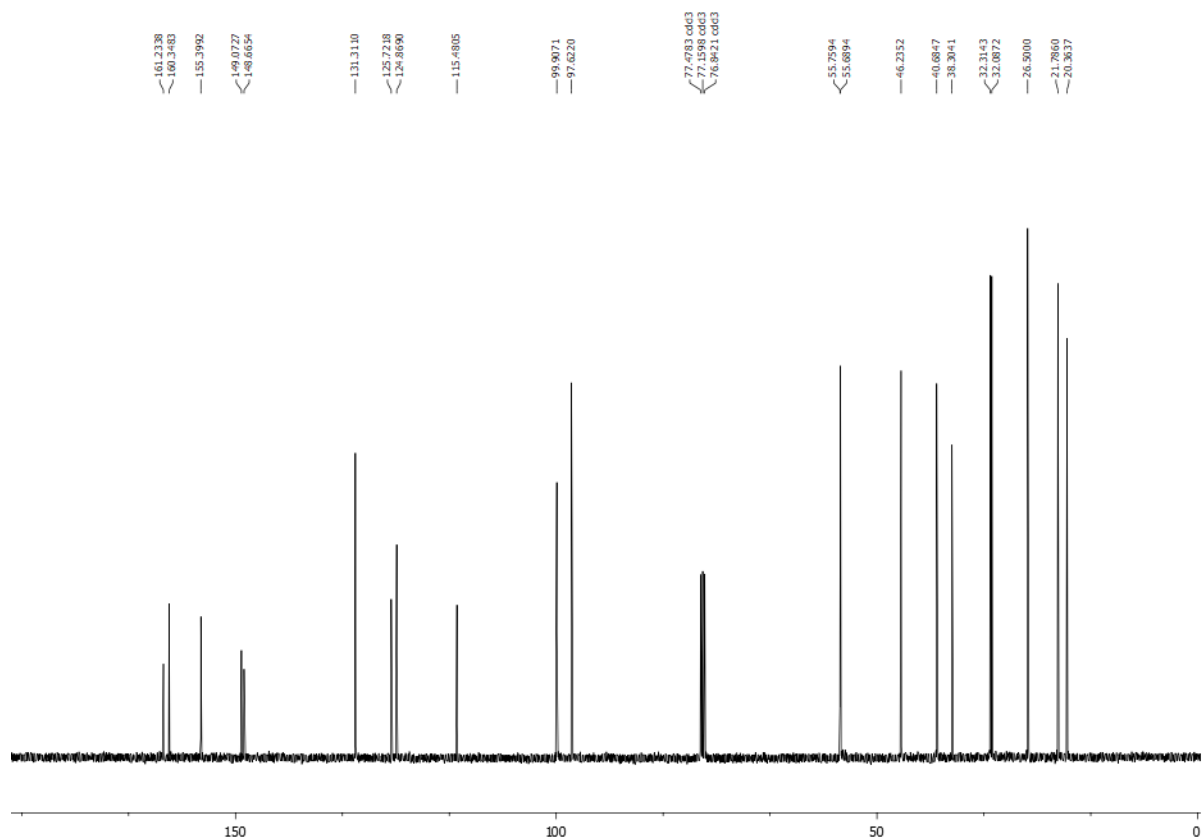

# $^1\text{H}$ NMR of 3a (400 MHz, $\text{CDCl}_3$ )

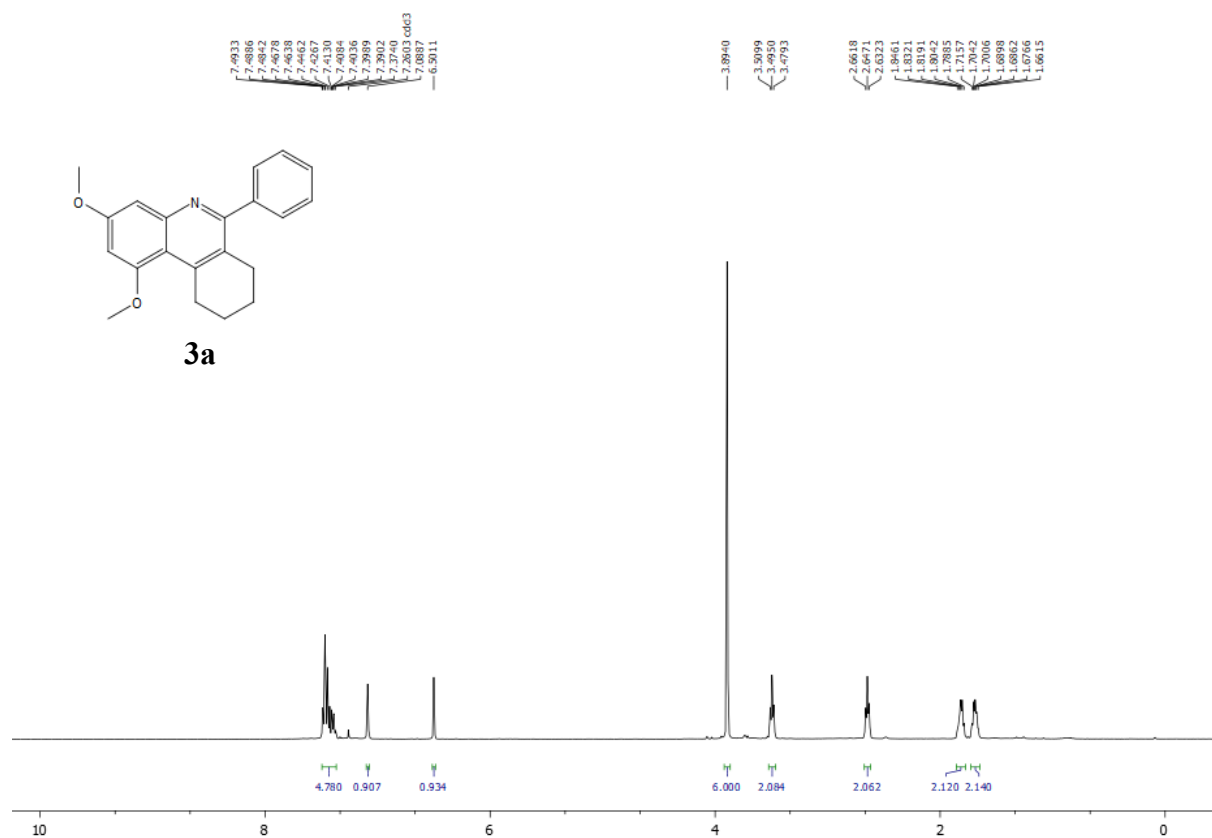

# $^{13}\text{C}\{^1\text{H}\}$ NMR of 3a (101 MHz, $\text{CDCl}_3$ )

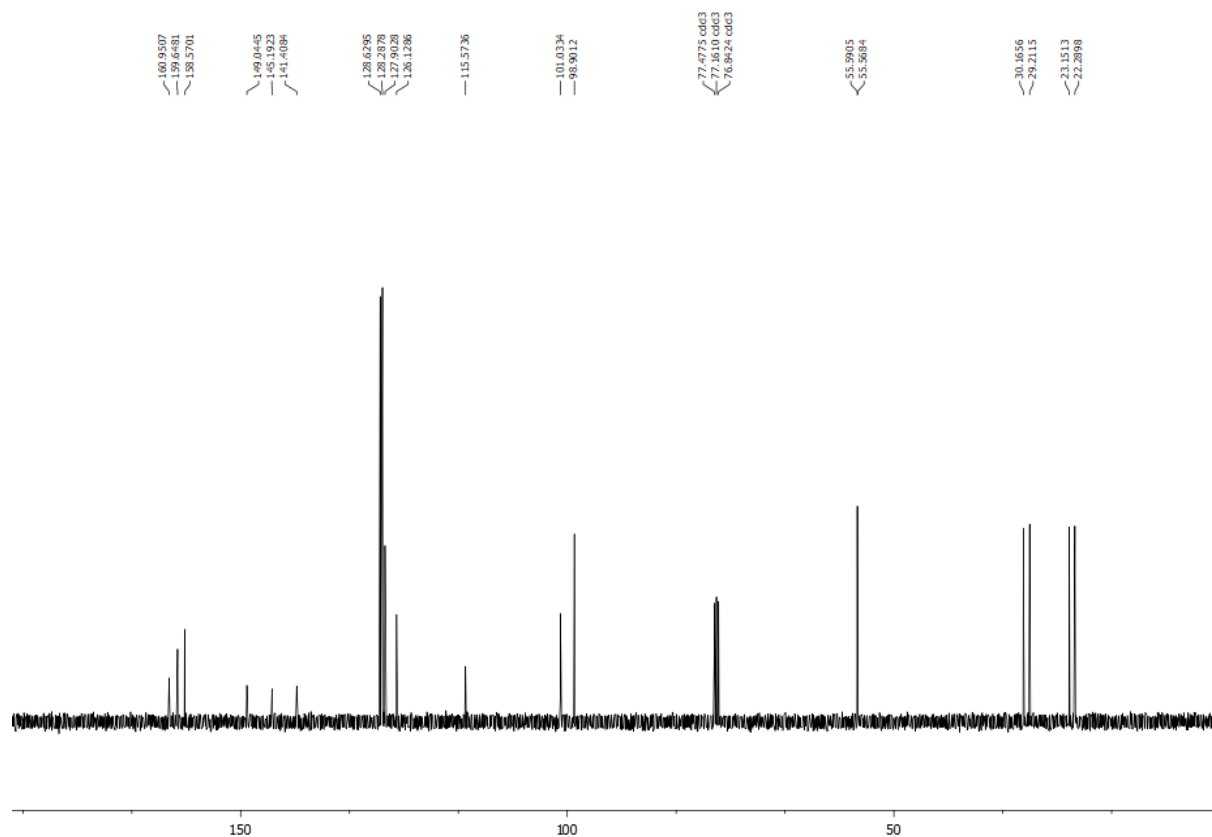



# <sup>1</sup>H NMR of 3b (400 MHz, CDCl<sub>3</sub>)

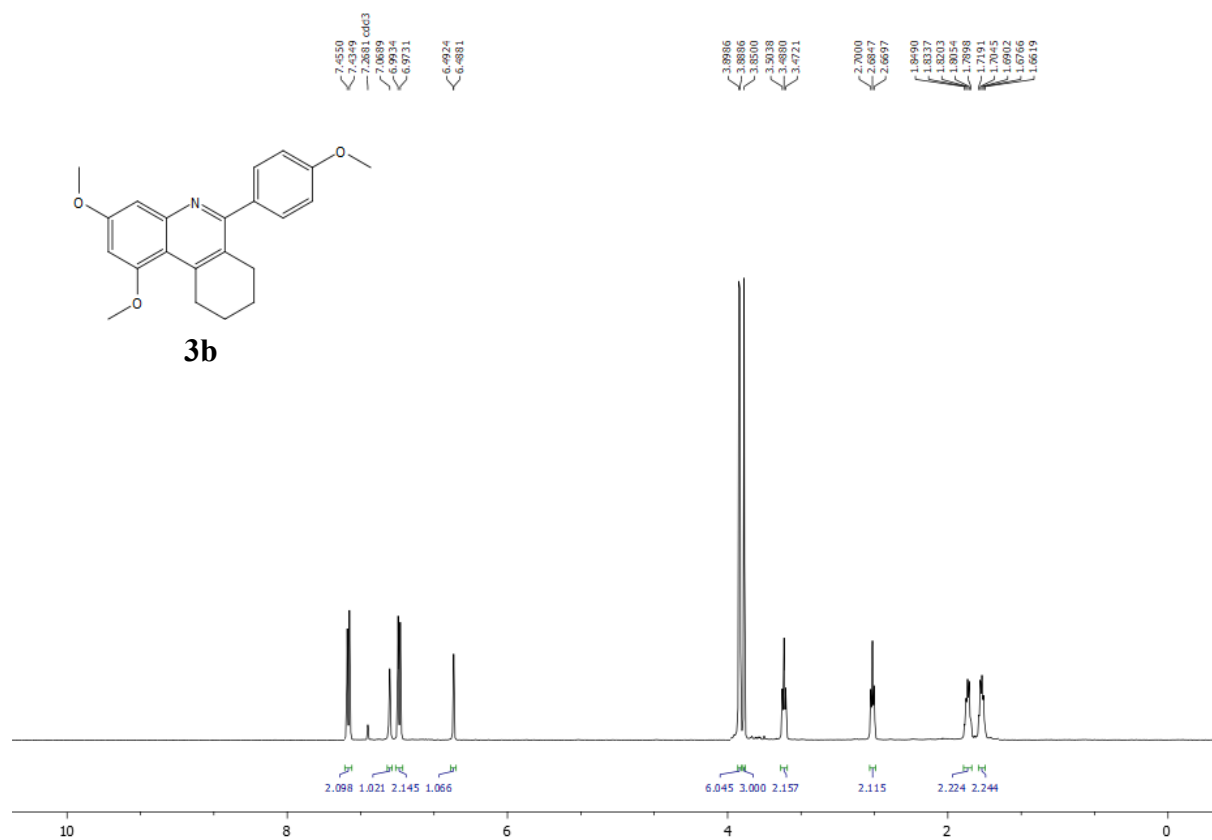

# <sup>13</sup>C{<sup>1</sup>H} NMR of 3b (101 MHz, CDCl<sub>3</sub>)

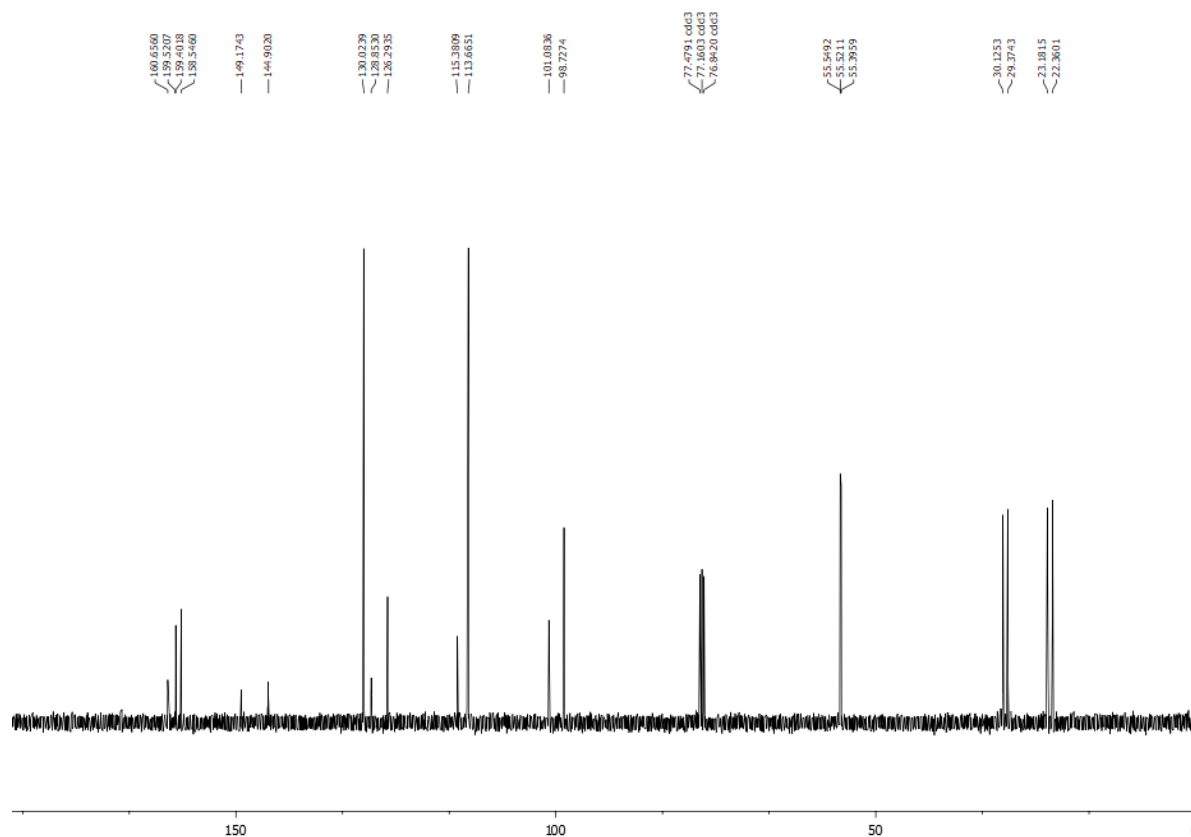

# $^1\text{H}$ NMR of 3c (400 MHz, $\text{CDCl}_3$ )

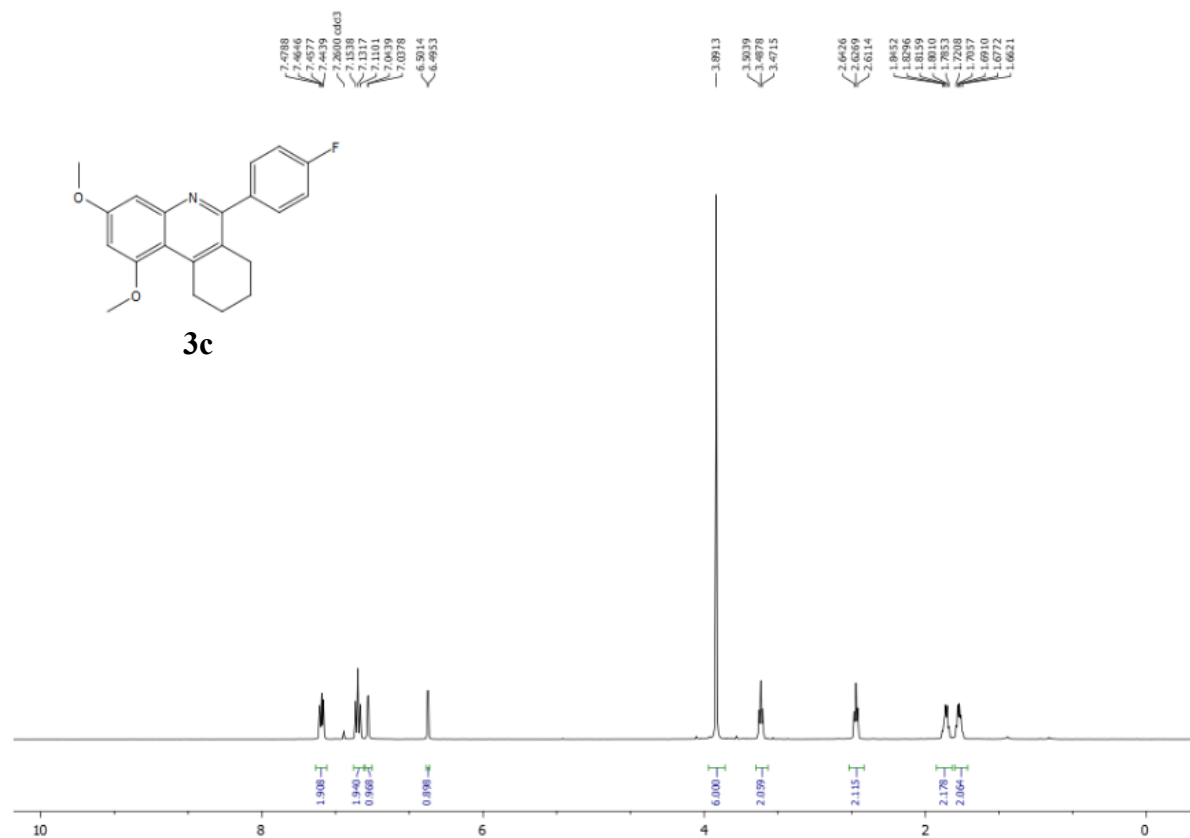

# $^{13}\text{C}\{^1\text{H}\}$ NMR of 3c (101 MHz, $\text{CDCl}_3$ )

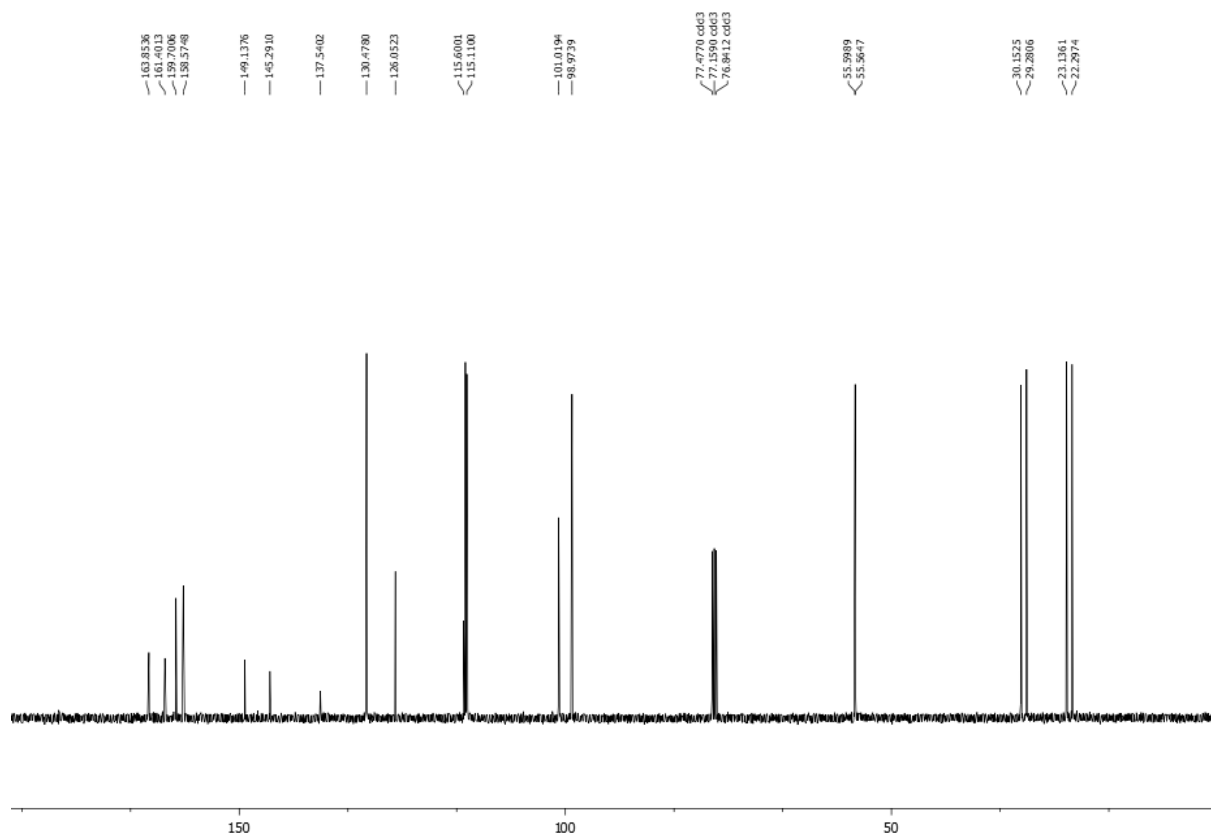

**$^{19}\text{F}$  NMR of 3c (376 MHz,  $\text{CDCl}_3$ )**

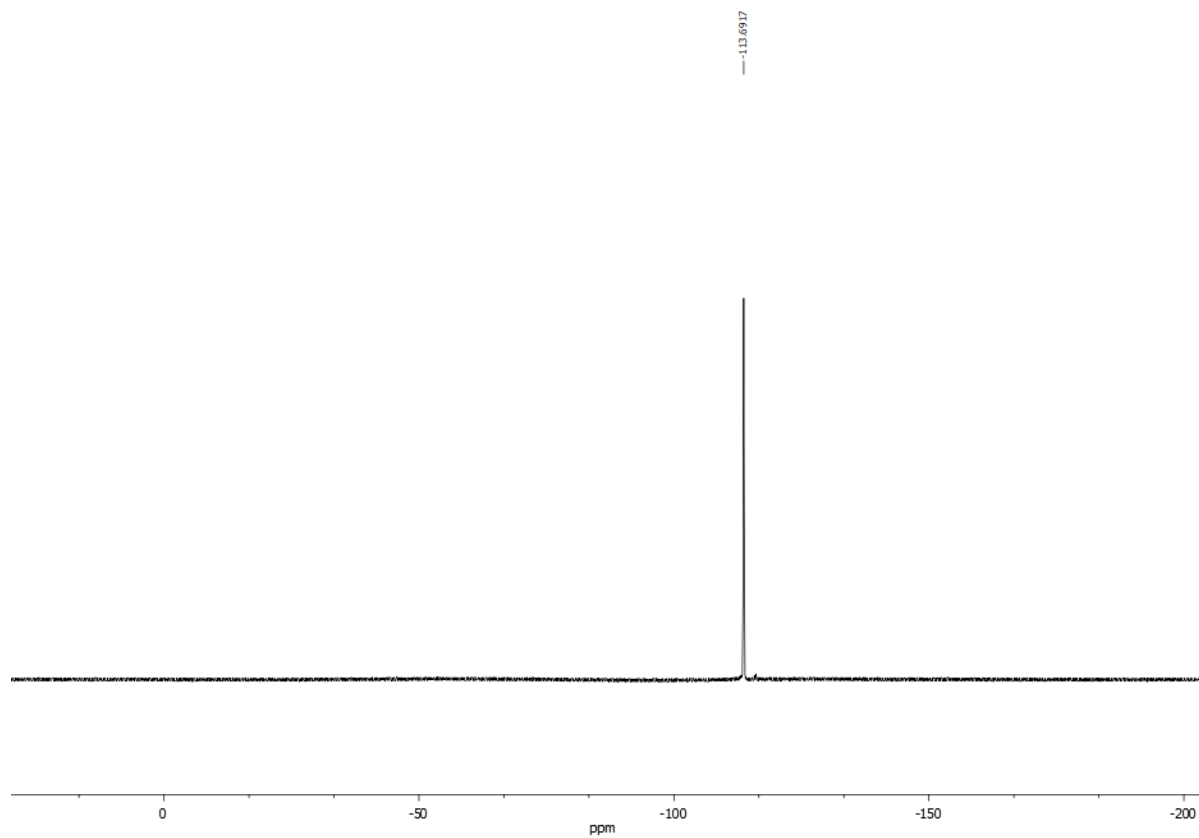

# $^1\text{H}$ NMR of 3d (400 MHz, $\text{CDCl}_3$ )

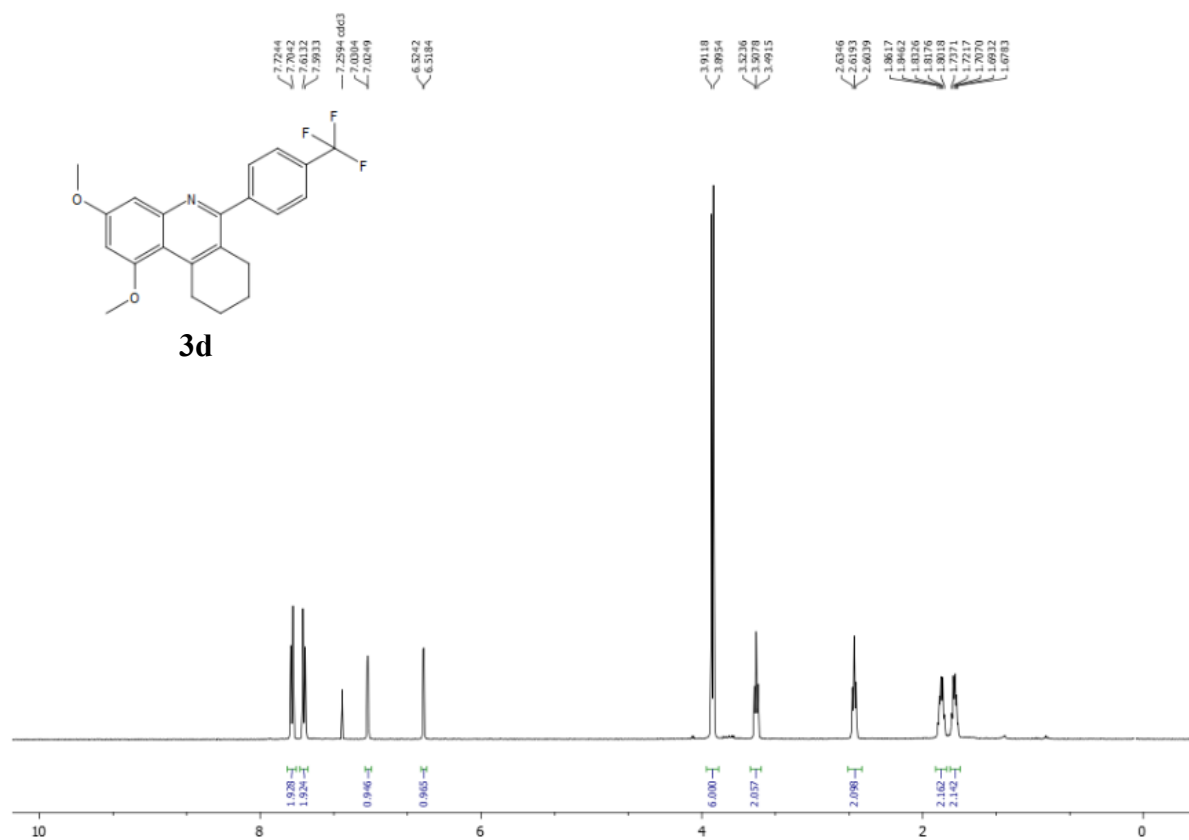

# $^{13}\text{C}\{^1\text{H}\}$ NMR of 3d (101 MHz, $\text{CDCl}_3$ )

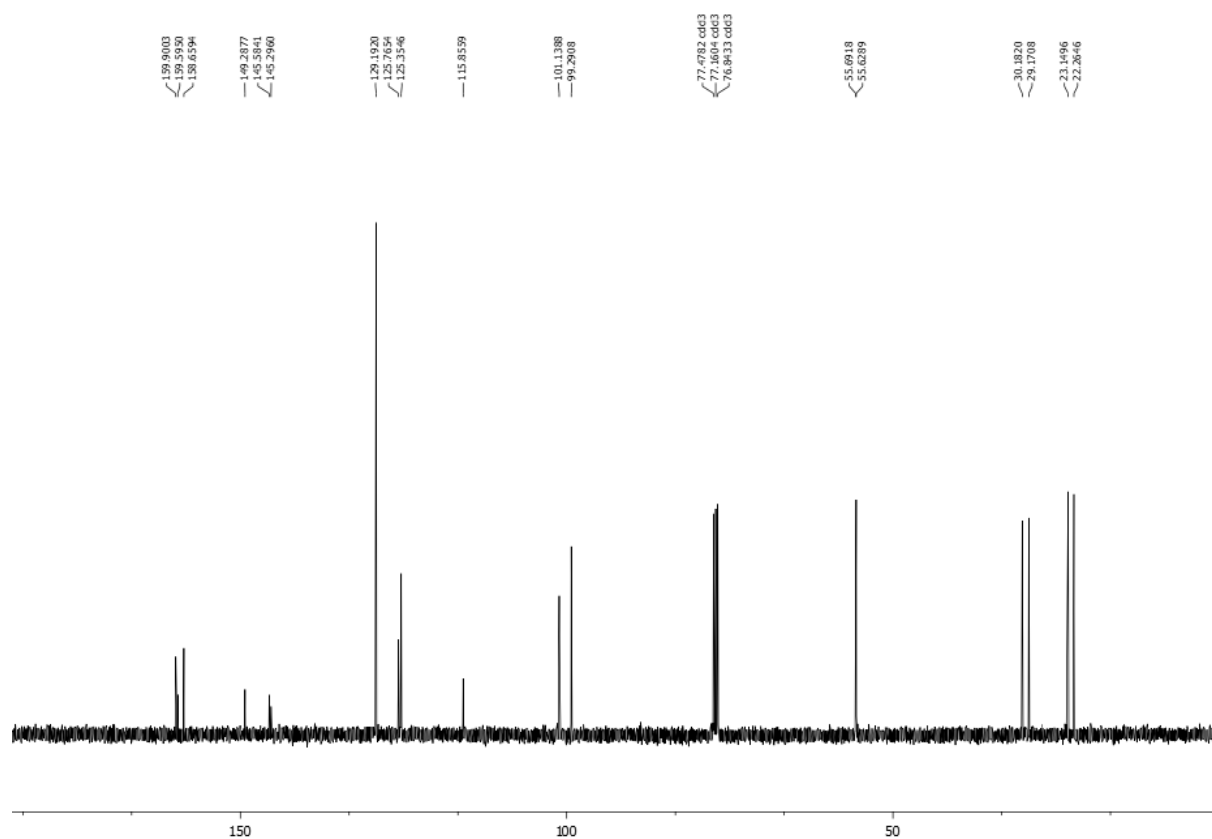

**$^{19}\text{F}$  NMR of 3d (376 MHz,  $\text{CDCl}_3$ )**

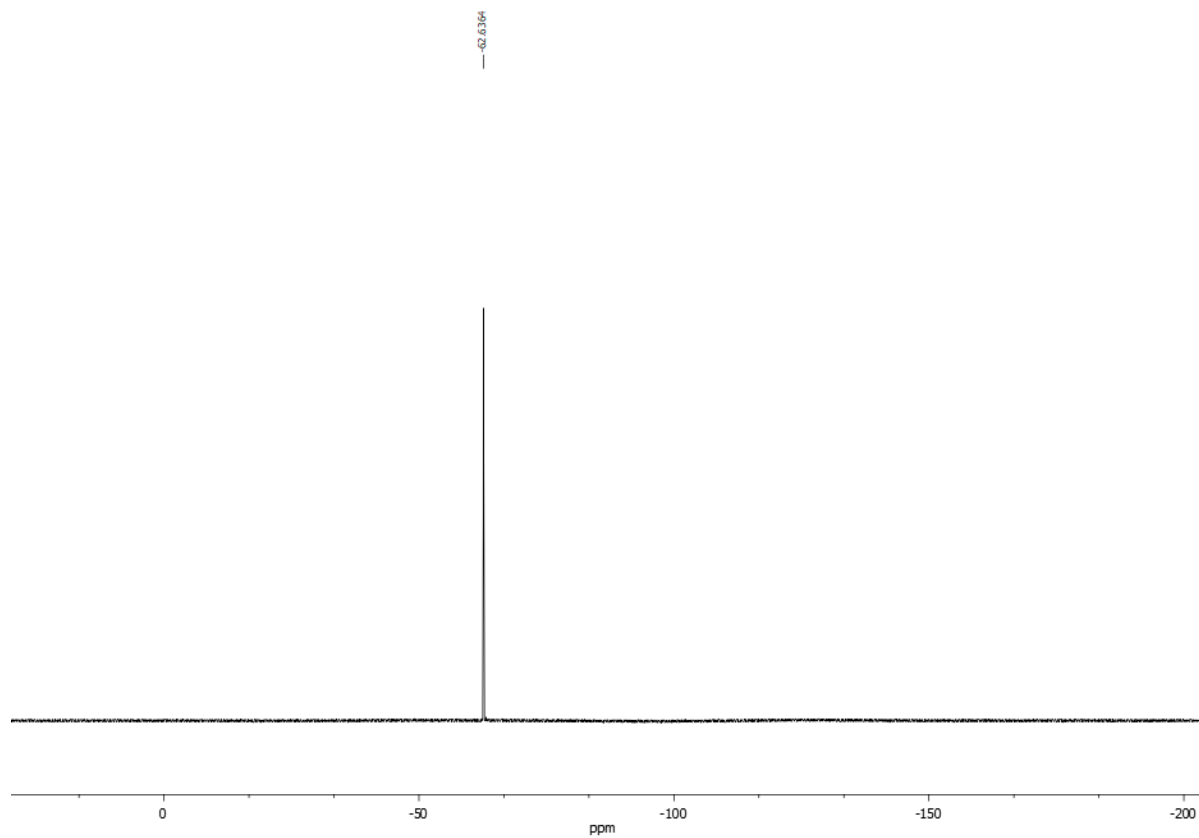

# $^1\text{H}$ NMR of 3e (400 MHz, $\text{CDCl}_3$ )

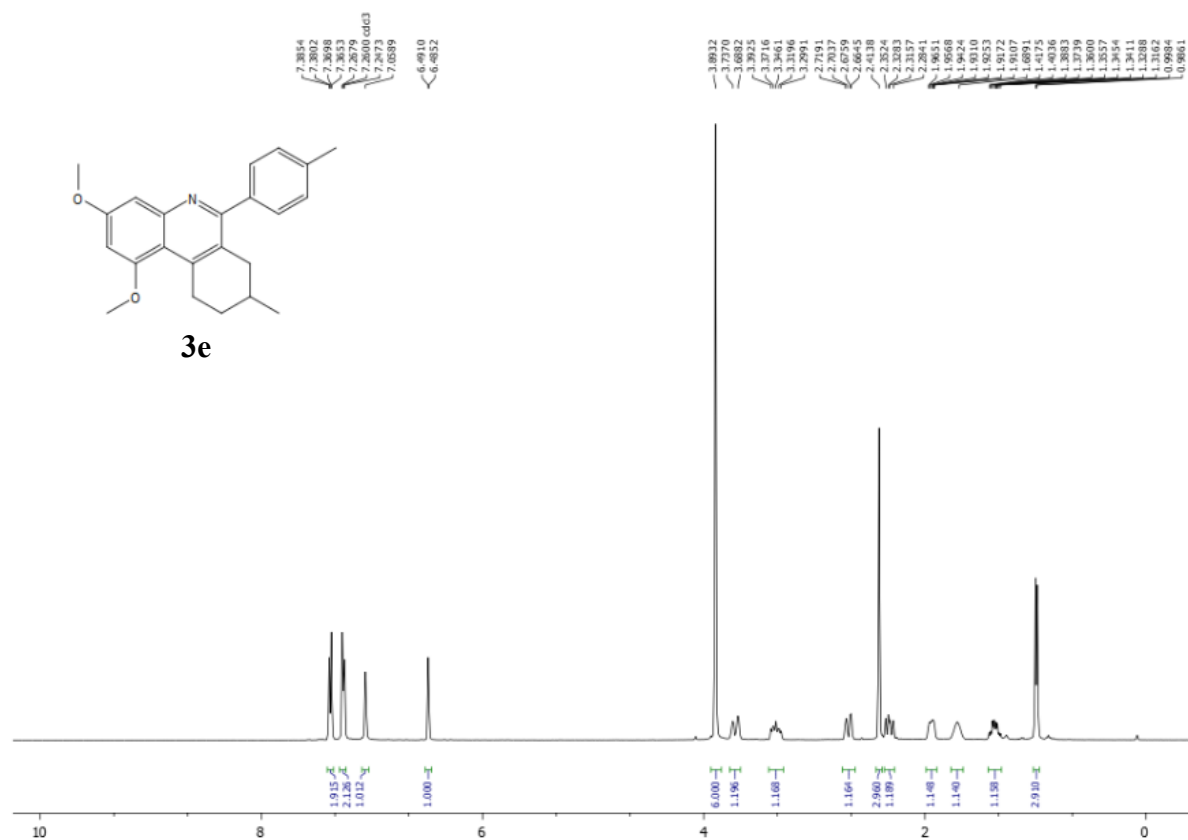

# $^{13}\text{C}\{^1\text{H}\}$ NMR of 3e (101 MHz, $\text{CDCl}_3$ )

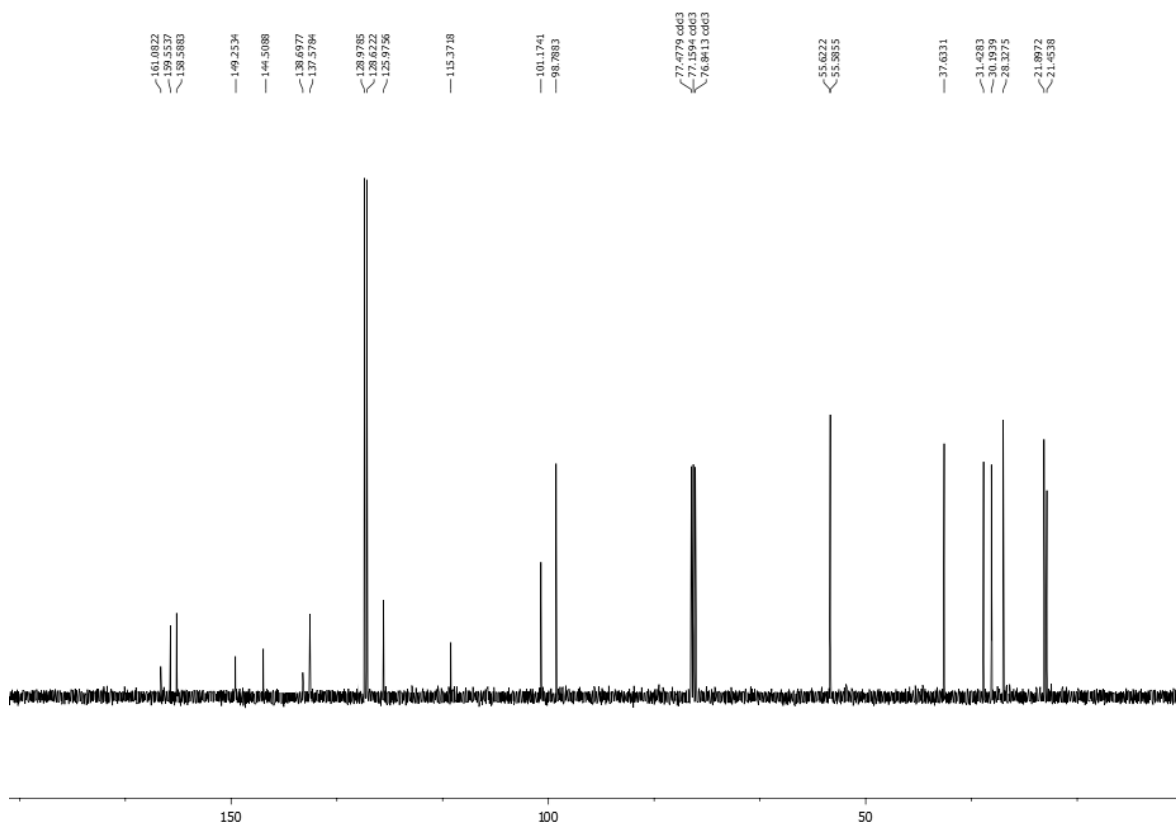

# $^1\text{H}$ NMR of 3f (400 MHz, $\text{CDCl}_3$ )

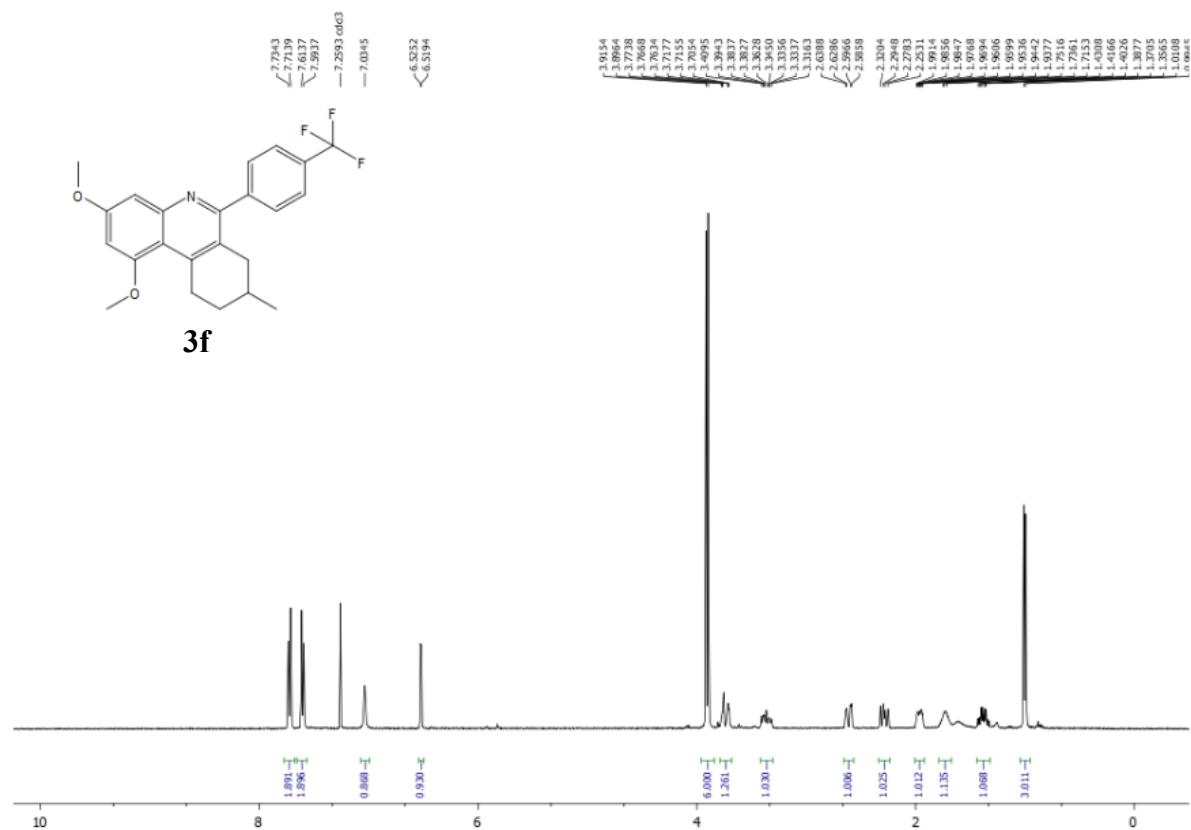

# $^{13}\text{C}\{^1\text{H}\}$ NMR of 3f (101 MHz, $\text{CDCl}_3$ )

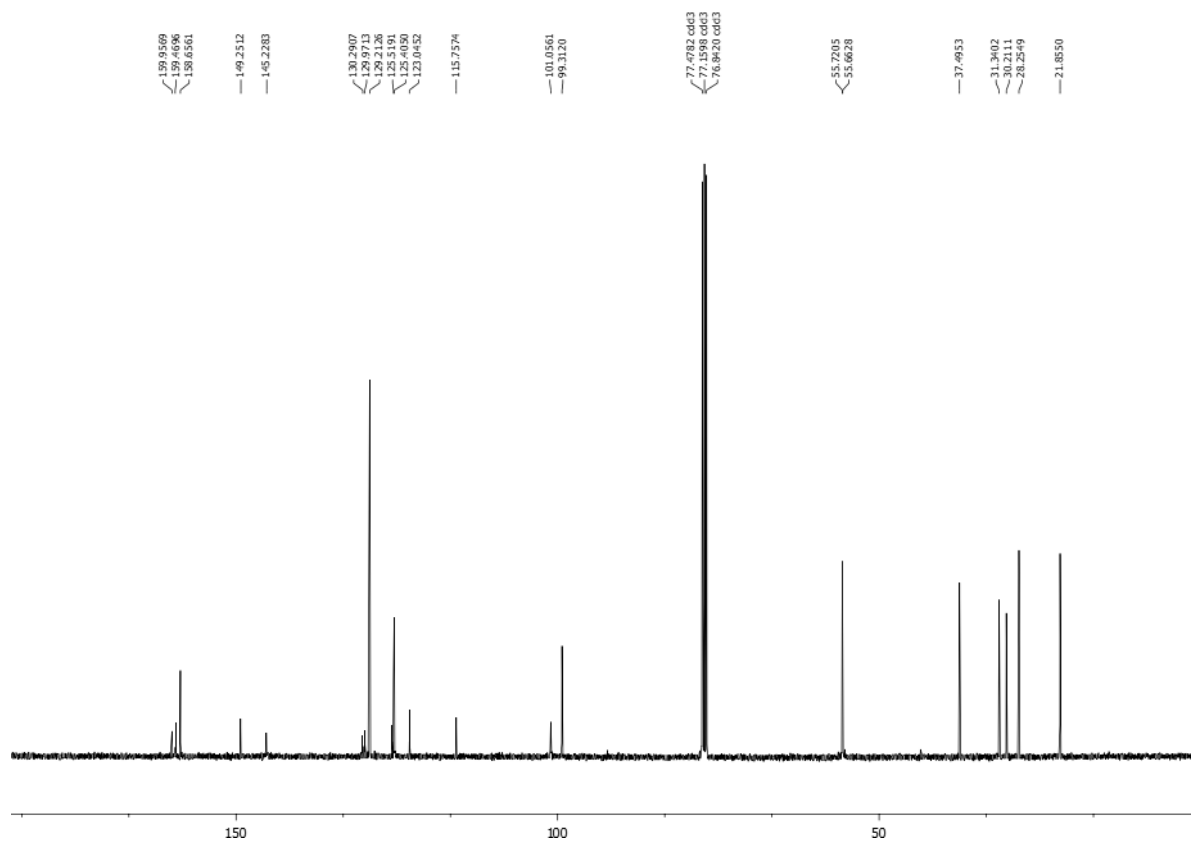

**$^{19}\text{F}$  NMR of 3f (376 MHz,  $\text{CDCl}_3$ )**

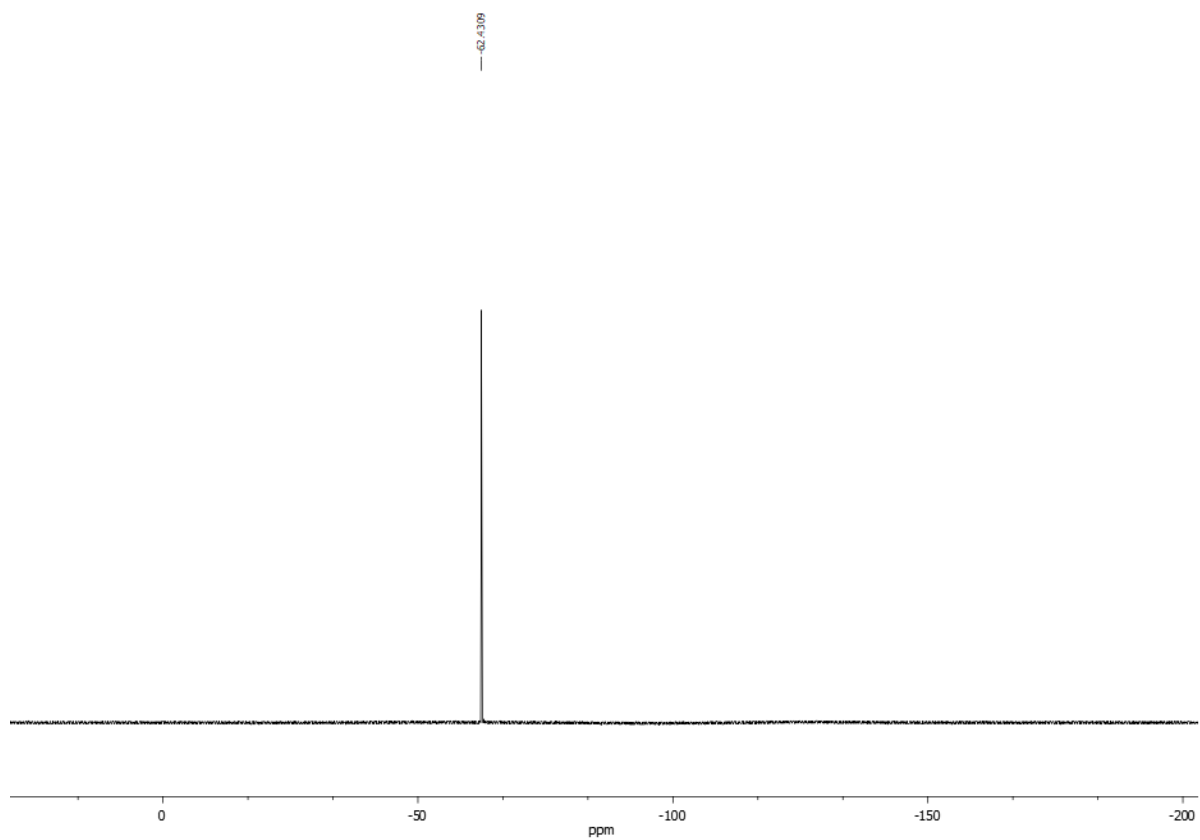



# $^1\text{H}$ NMR of 3g (400 MHz, $\text{CDCl}_3$ )

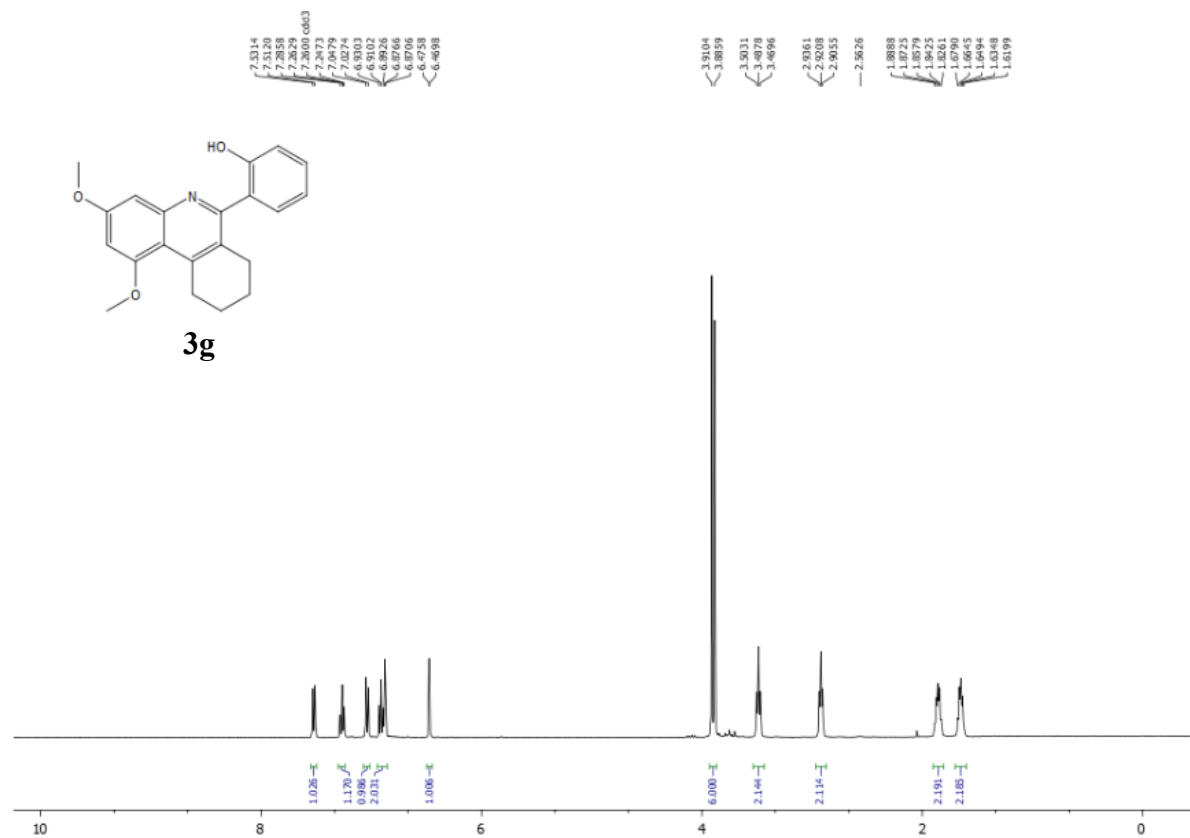

# $^{13}\text{C}\{^1\text{H}\}$ NMR of 3g (101 MHz, $\text{CDCl}_3$ )

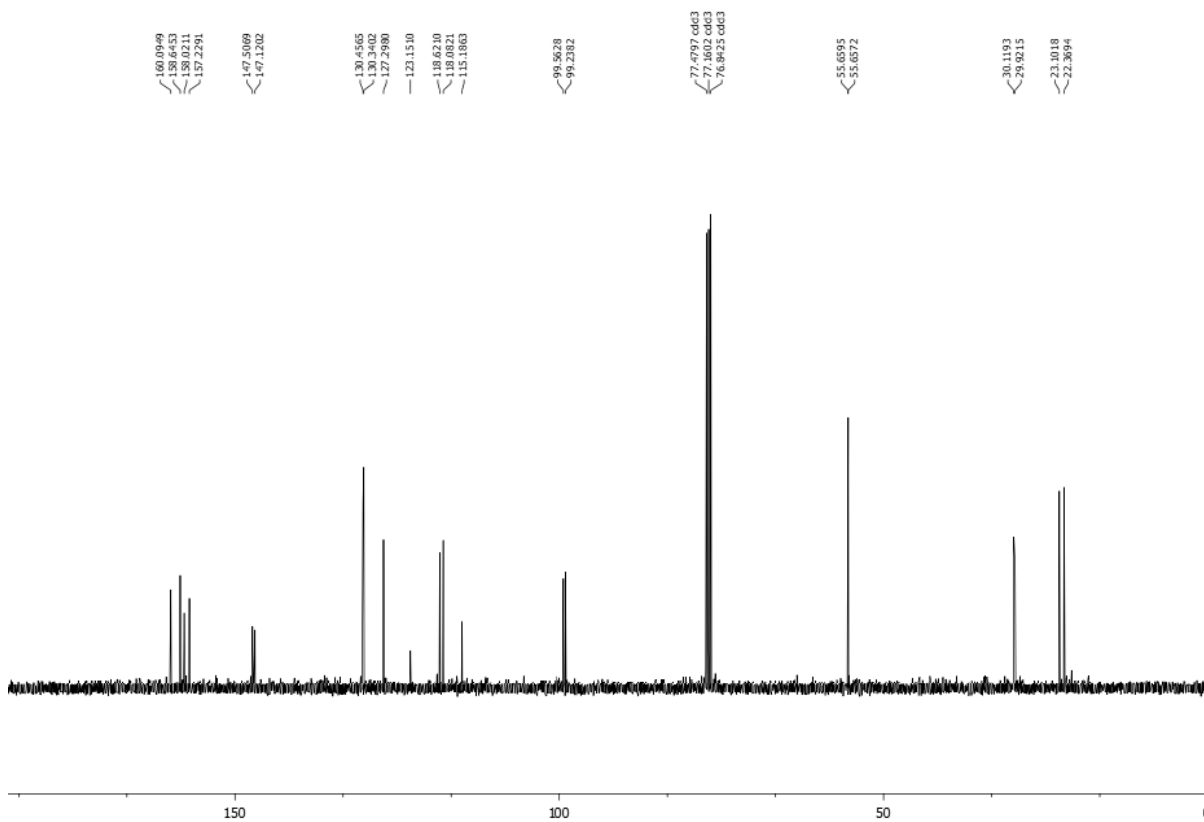

$^1\text{H}$  NMR of **3h** (400 MHz,  $\text{CDCl}_3$ )

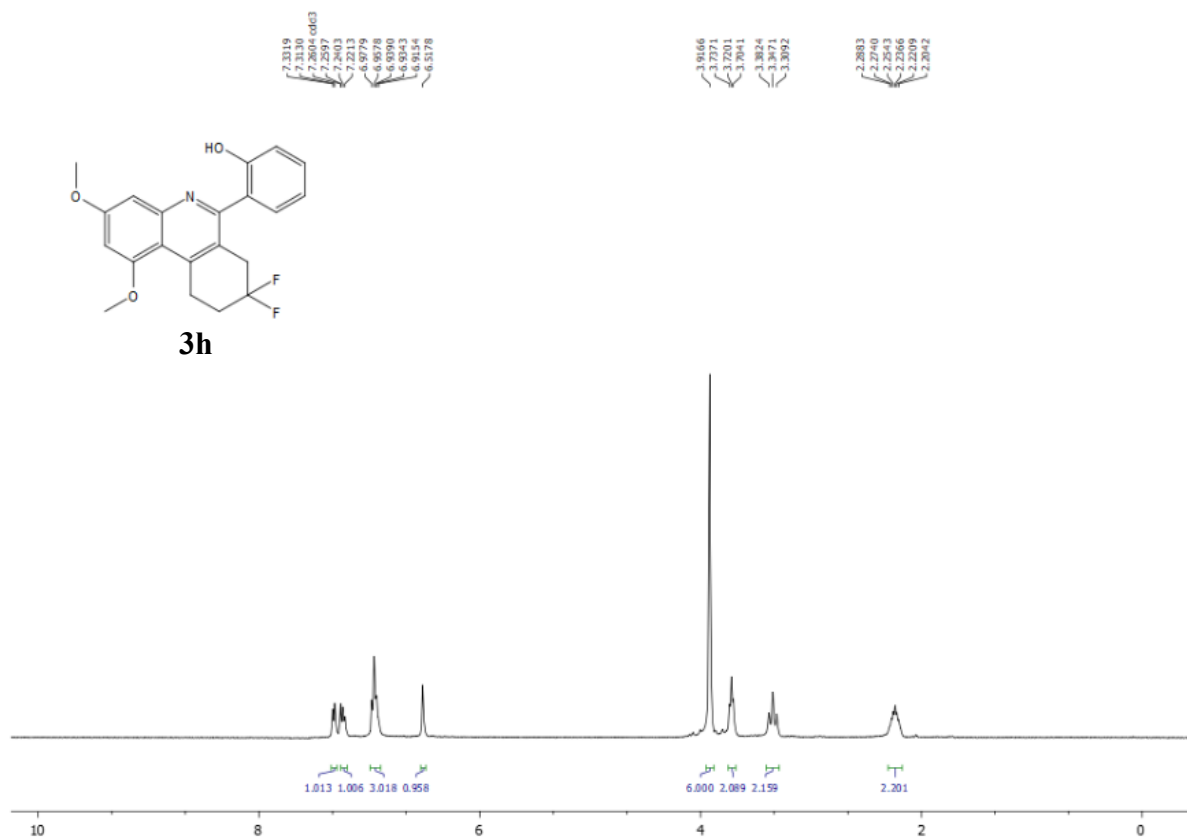

$^{13}\text{C}\{^1\text{H}\}$  NMR of **3h** (101 MHz,  $\text{CDCl}_3$ )

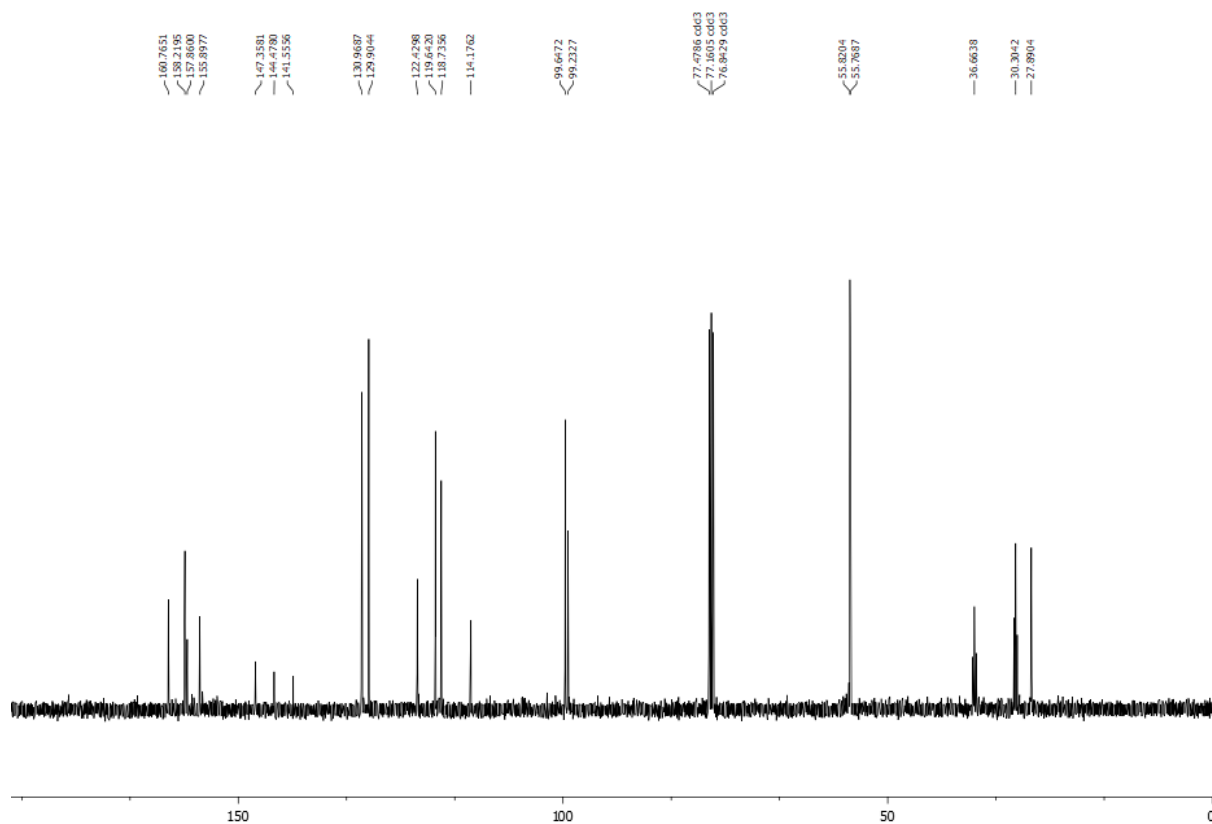

**$^{19}\text{F}$  NMR of 3h (376 MHz,  $\text{CDCl}_3$ )**

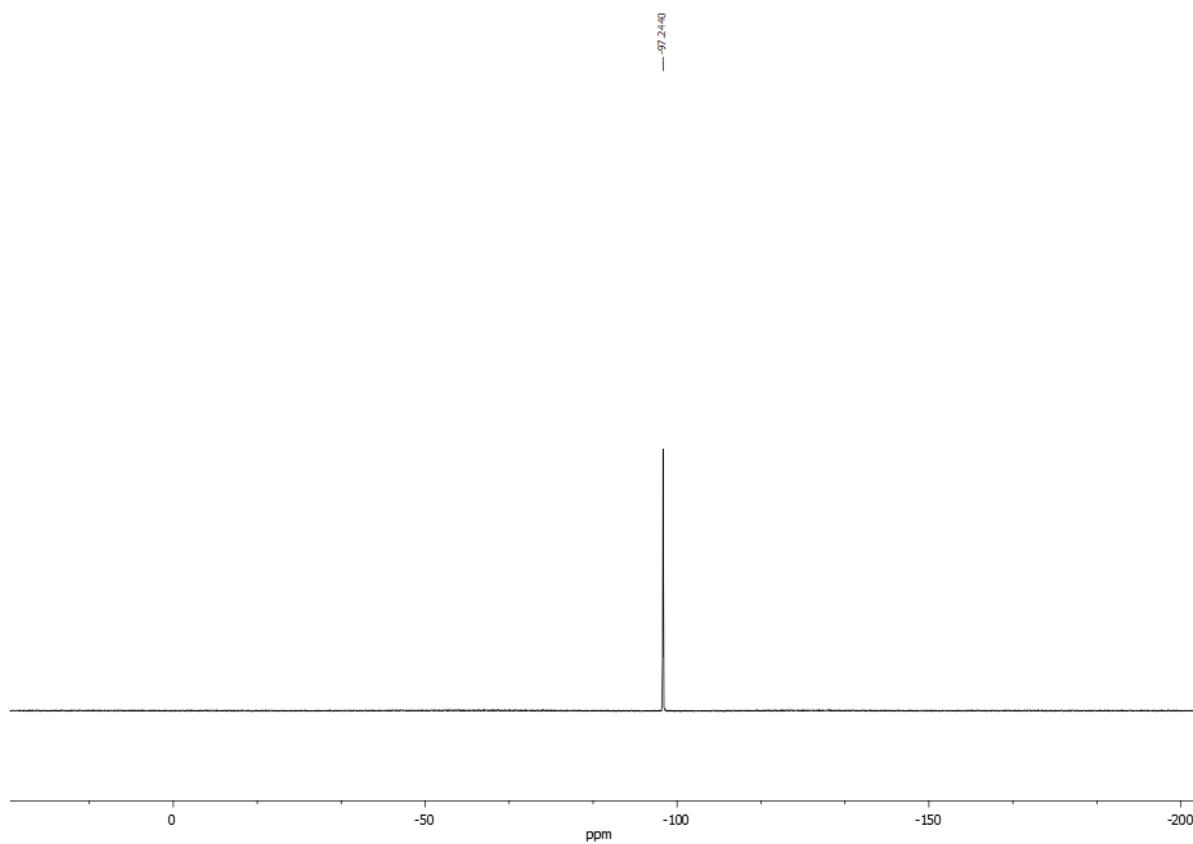

### $^1\text{H}$ NMR of **3i** (400 MHz, $\text{CDCl}_3$ )

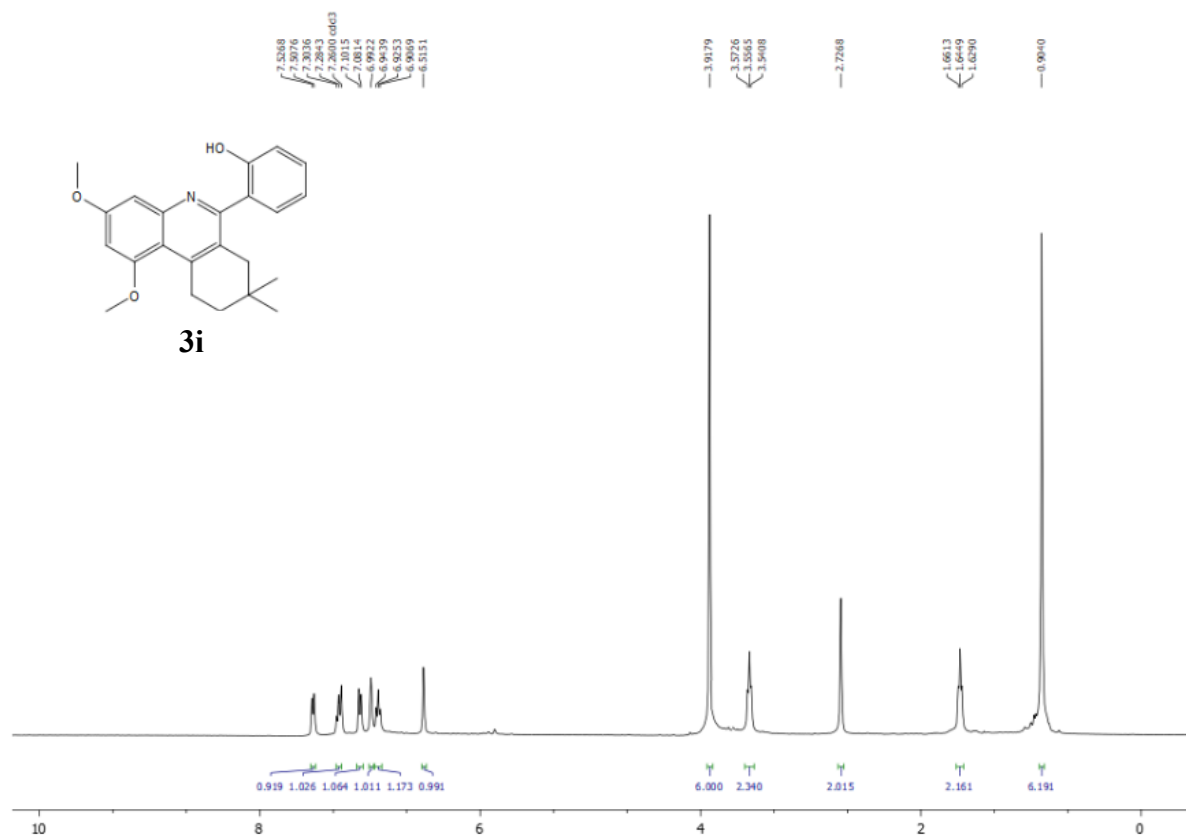

### $^{13}\text{C}\{^1\text{H}\}$ NMR of **3i** (101 MHz, $\text{CDCl}_3$ )

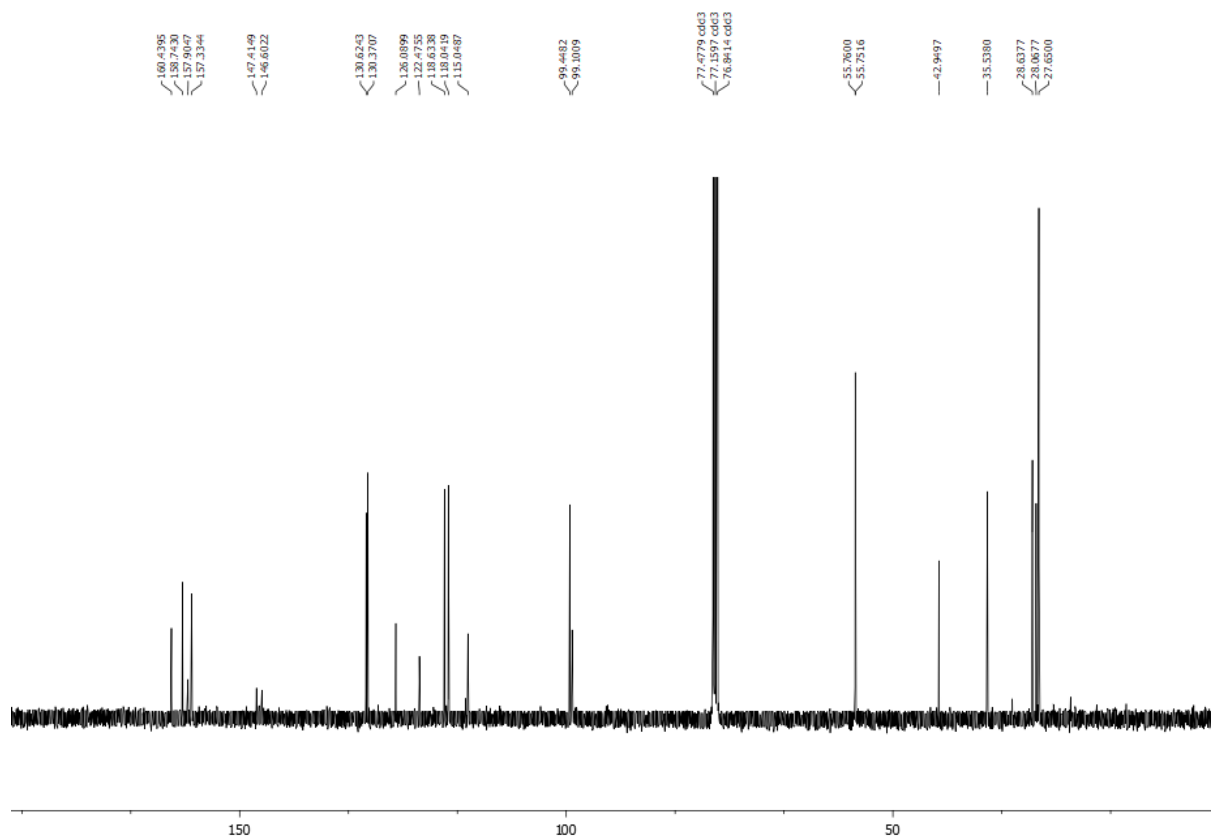

### $^1\text{H}$ NMR of **3j** (400 MHz, $\text{CDCl}_3$ )

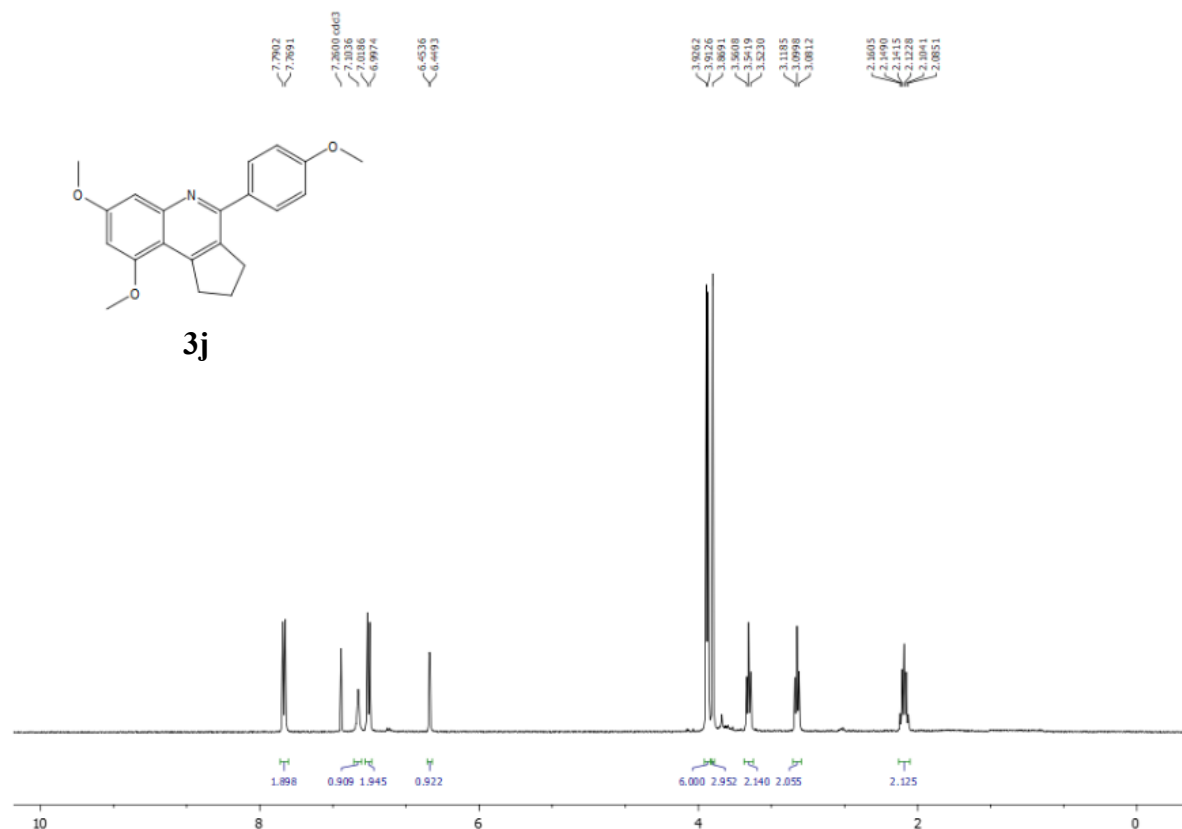

### $^{13}\text{C}\{^1\text{H}\}$ NMR of **3j** (101 MHz, $\text{CDCl}_3$ )

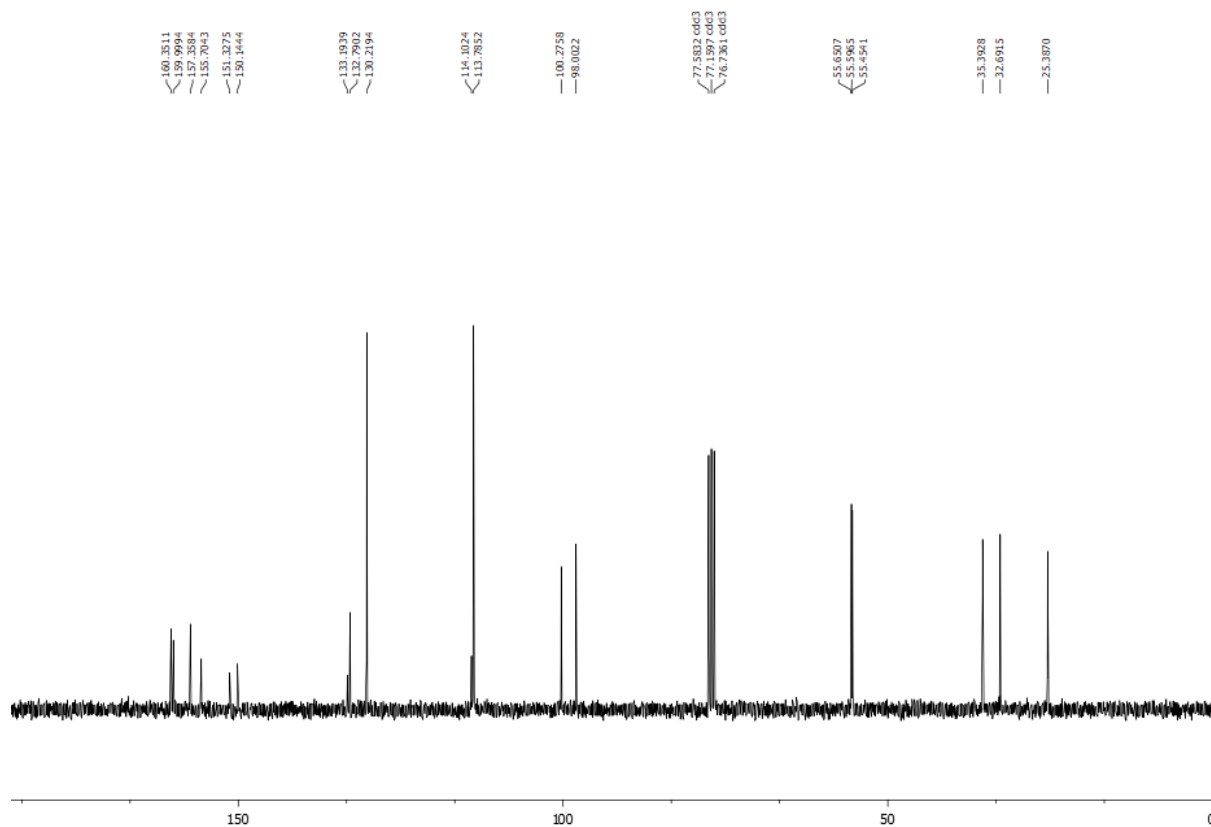

### $^1\text{H}$ NMR of 3k (400 MHz, $\text{CDCl}_3$ )

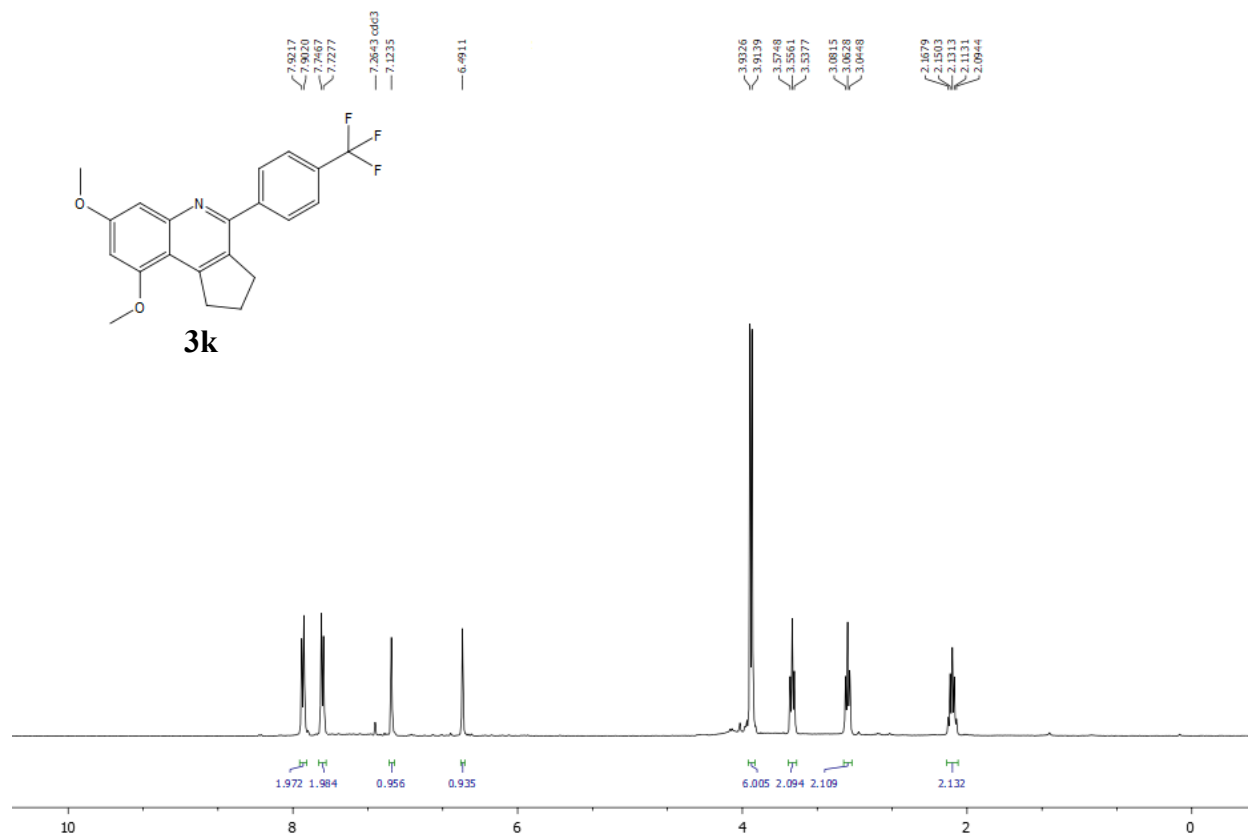

### $^{13}\text{C}\{^1\text{H}\}$ NMR of 3k (101 MHz, $\text{CDCl}_3$ )

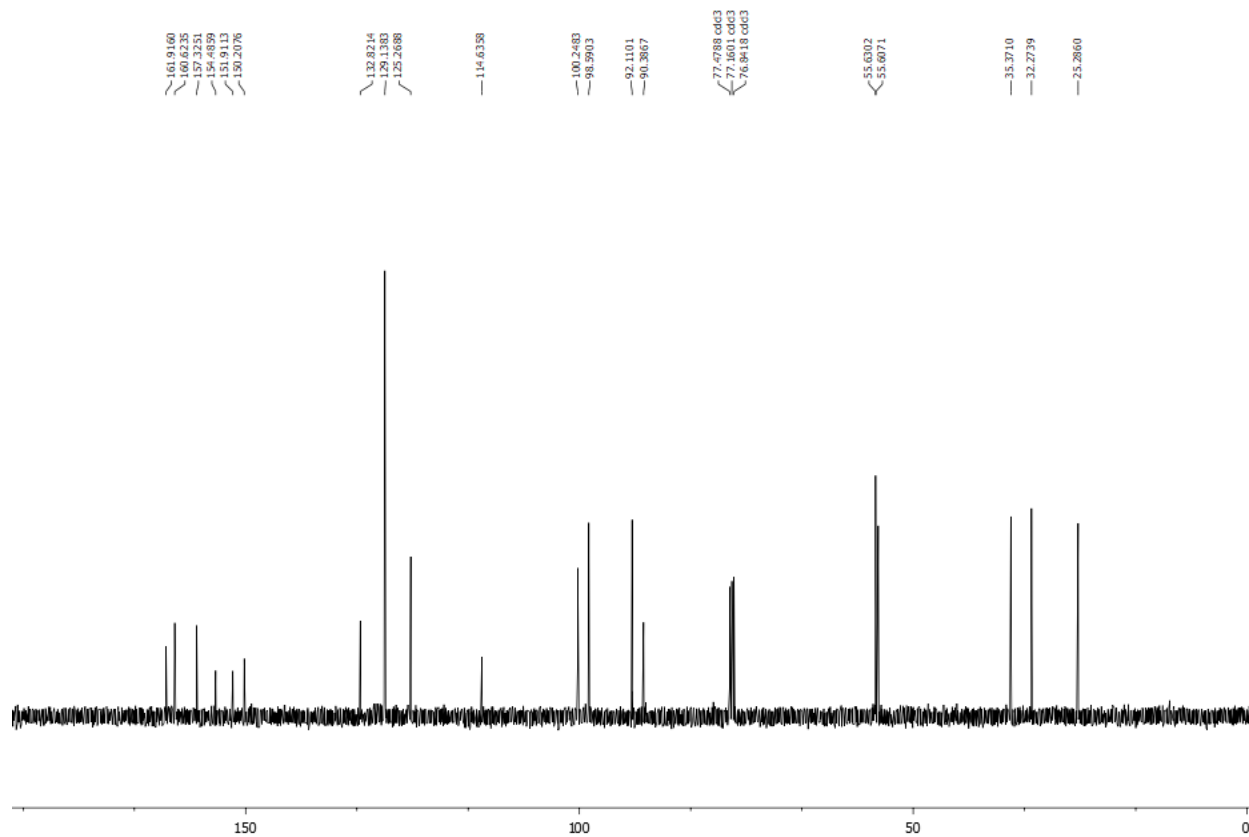

**$^{19}\text{F}$  NMR of 3k (376 MHz,  $\text{CDCl}_3$ )**

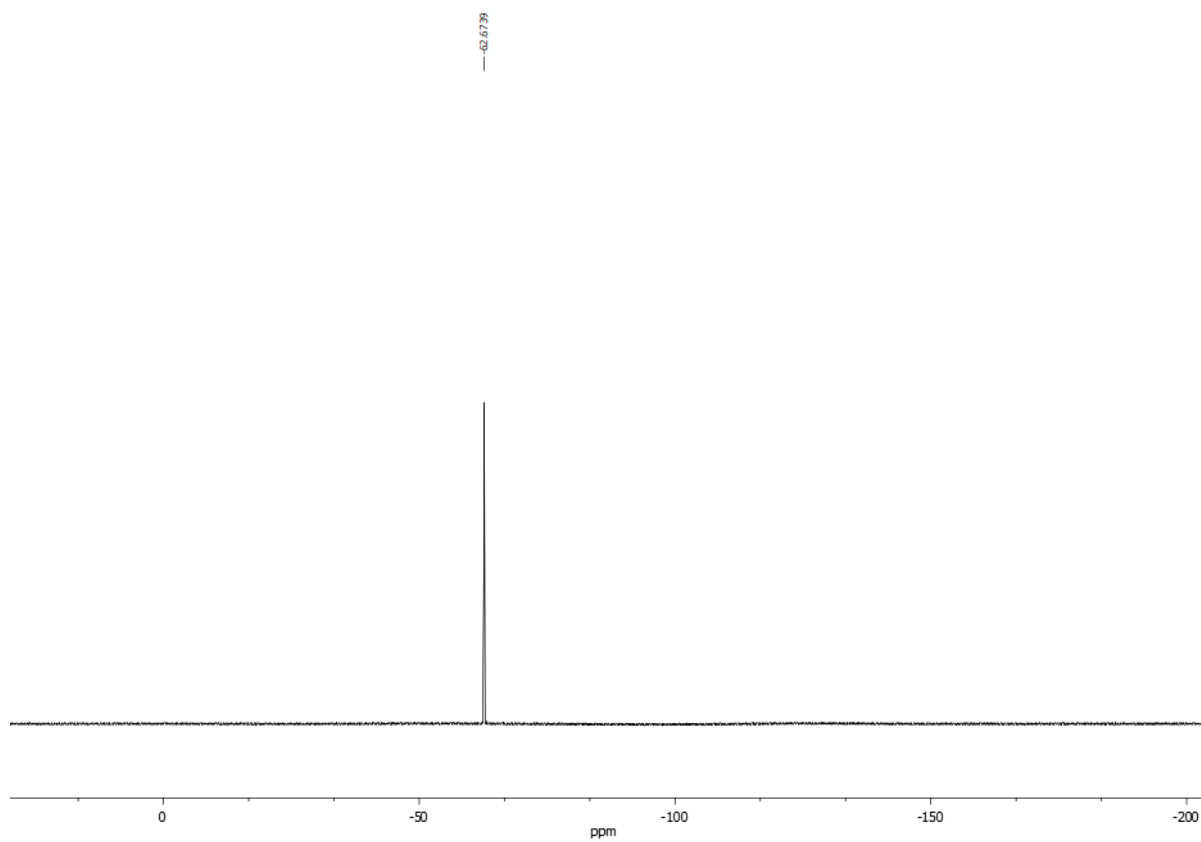

# $^1\text{H}$ NMR of 31 (400 MHz, $\text{CDCl}_3$ )

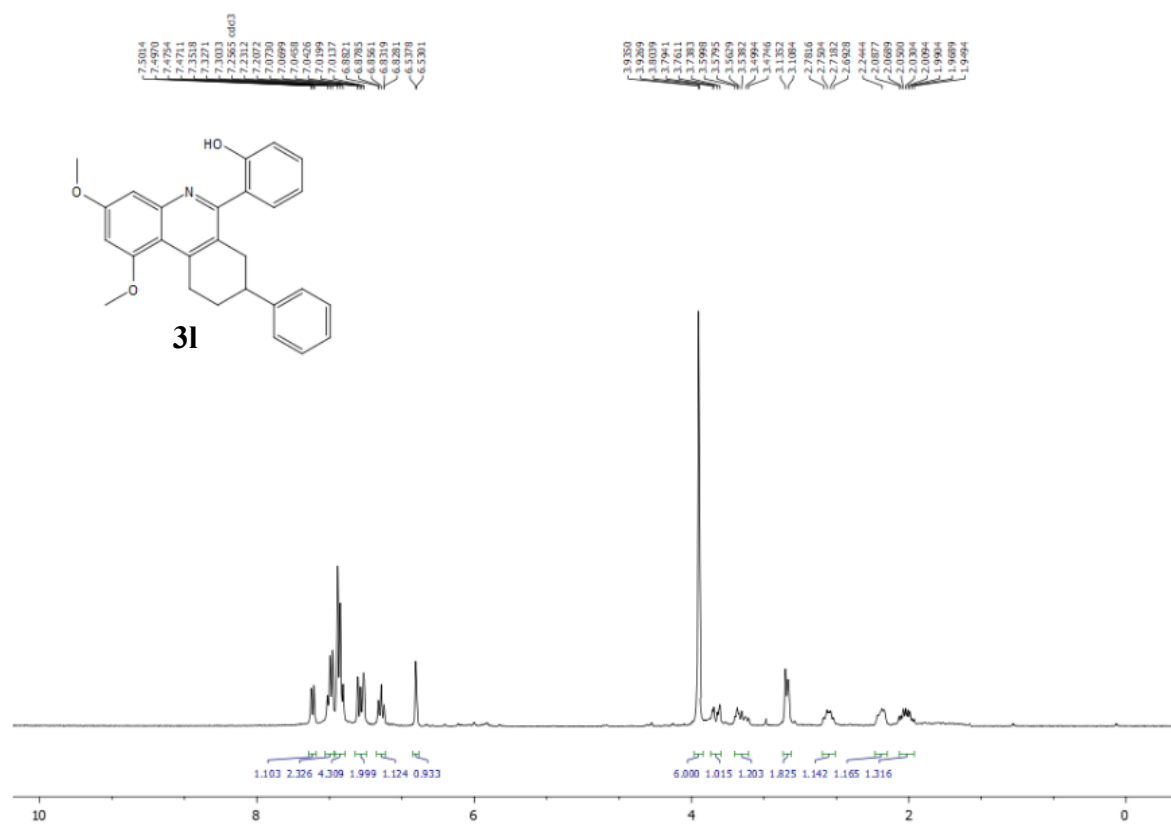

# $^{13}\text{C}\{^1\text{H}\}$ NMR of 31 (101 MHz, $\text{CDCl}_3$ )

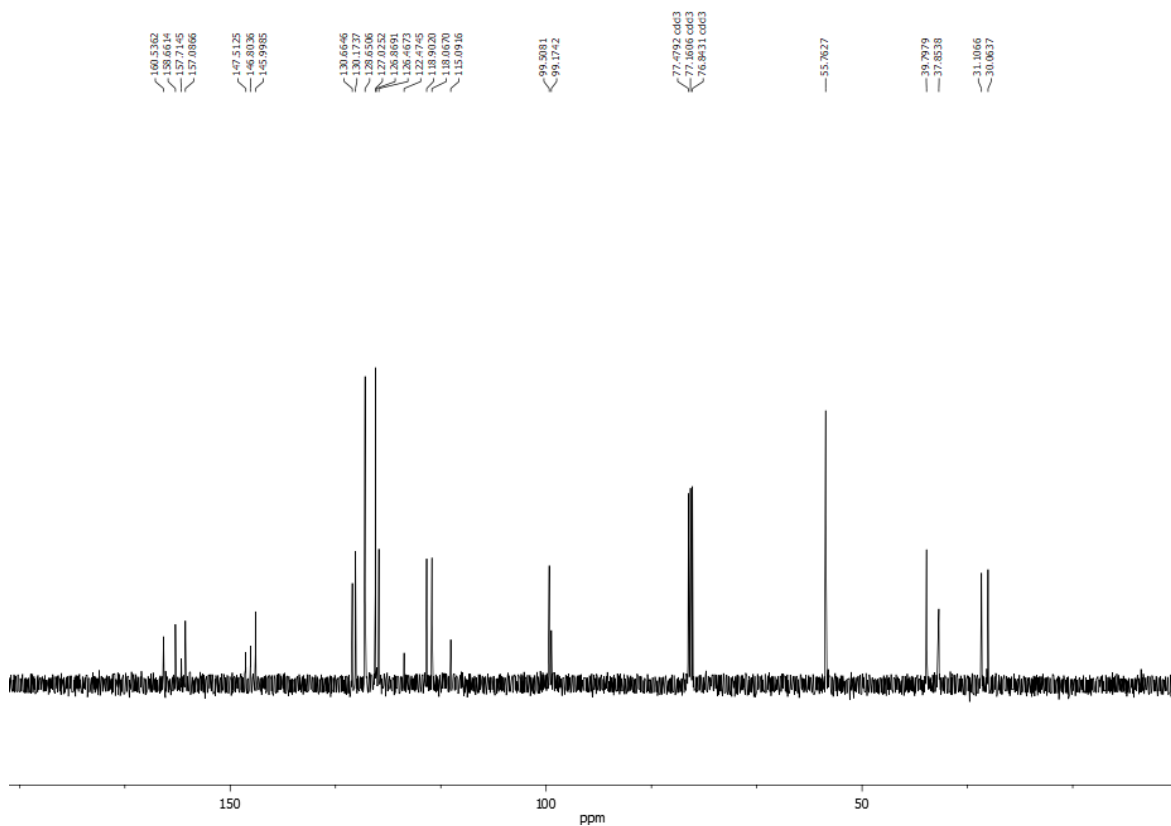



## 10. References

- S1. (a) Singleton, D. A.; Thomas, A. A. High-Precision Simultaneous Determination of Multiple Small Kinetic Isotope Effects at Natural Abundance. *J. Am. Chem. Soc.* **1995**, *117*, 9357-9358. (b) Frantz, D. E.; Singleton, D. A.; Snyder, J. P. <sup>13</sup>C Kinetic Isotope Effects for the Addition of Lithium Dibutylcuprate to Cyclohexenone. Reductive Elimination is Rate-Determining. *J. Am. Chem. Soc.* **1997**, *119*, 3383-3384.
- S2. Dolomanov, O. V.; Bourhis, L. J.; Gildea, R. J.; Howard, J. A. K.; Puschmann, H. J. OLEX2: A Complete Structure Solution, Refinement and Analysis Program. *Appl. Cryst.* **2009**, *42*, 339-341.
- S3. Bourhis, L. J.; Dolomanov, O. V.; Gildea, R. J.; Howard, J. A. K.; Puschmann, H. The Anatomy of a Comprehensive Constrained, Restrained Refinement Program for the Modern Computing Environment-Olex2 Dissected. *Acta Cryst.* **2015**, *A71*, 59-75.
- S4. Sheldrick, G. M. SHELXT-Integrated Space-Group and Crystal-Structure Determination. *Acta Cryst.* **2015**, *C71*, 3-8.
- S5. Zheng, Z.; Deng, G.; Liang, Y. Synthesis Of Quinolines Through Copper-Catalyzed Intermolecular Cyclization Reaction from Anilines and Terminal Acetylene Esters. *RSC Adv.* **2016**, *6*, 103478-103481.
- S6. Narasimhamurthy, K.; Chandrappa, S.; Kumar, K.; Swaroop, T.; Rangappa, K. Synthetic Utility of Propylphosphonic Anhydride-DMSO Media: an Efficient One-Pot Three-Component Synthesis of 2-Arylquinolines. *Chem. Lett.* **2013**, *42*, 1073-1075.
